# Supplementary material for: Programming Skeletal Muscle Metabolic Flexibility in Offspring of Male Rats in Response to Maternal Consumption of Slow Digesting Carbohydrates during Pregnancy
Source: PubMed Central journal article supplement (PMC7071425; doi:10.3390/nu12020528), 2020-02-19
Supplement: nutrients-12-00528-s001.pdf [file nutrients-12-00528-s001.pdf]

# Programming skeletal muscle metabolic flexibility in offspring of male rats in response to maternal consumption of slow digesting carbohydrates during pregnancy

Rafael Salto<sup>1#\*</sup>, María D Girón<sup>1#</sup>, Manuel Manzano<sup>2</sup>, María J Martín<sup>2</sup>, Jose D Vílchez<sup>1</sup>, Pilar Bueno-Vargas<sup>2</sup>, Elena Cabrera<sup>1</sup>, Mónica Pérez-Alegre<sup>3</sup>, Eloisa Andujar<sup>3</sup>, Ricardo Rueda<sup>2</sup>, Jose M Lopez-Pedrosa<sup>2</sup>

<sup>1</sup> Department of Biochemistry and Molecular Biology II, School of Pharmacy, University of Granada, Campus de Cartuja, 18071 Granada, Spain; rsalto@ugr.es (RS), mgiron@ugr.es (MDG), e.damaso@go.ugr.es (JDV), elenacc\_20@hotmail.com (EC)

<sup>2</sup> Abbott Nutrition R&D, Abbott Laboratories, 18004 Granada, Spain; manuel.manzano@abbott.com (MM), chmmmj@yahoo.com (MJM), pilar.bueno@abbott.com (PB-V), ricardo.rueda@abbott.com (RR), jose.m.lopez@abbott.com (JMLP)

<sup>3</sup> Centro Andaluz de Biología Molecular y Medicina Regenerativa-CABIMER, Universidad de Sevilla-CSIC-Universidad Pablo de Olavide, Seville, Spain; monica.perez@cabimer.es (MP-A), eloisa.andujar@cabimer.es (EA)

# These authors contributed equally to this work.

\* Correspondence: rsalto@ugr.es; Tel.: +34-958-246363 (RS)

## SUPPLEMENTARY MATERIAL

- Supplementary Figure S1
- Supplementary Figure S2
- Supplementary Table S1
- Supplementary Table S2
- Supplementary Table S3
- Supplementary Table S4
- Supplementary Table S5

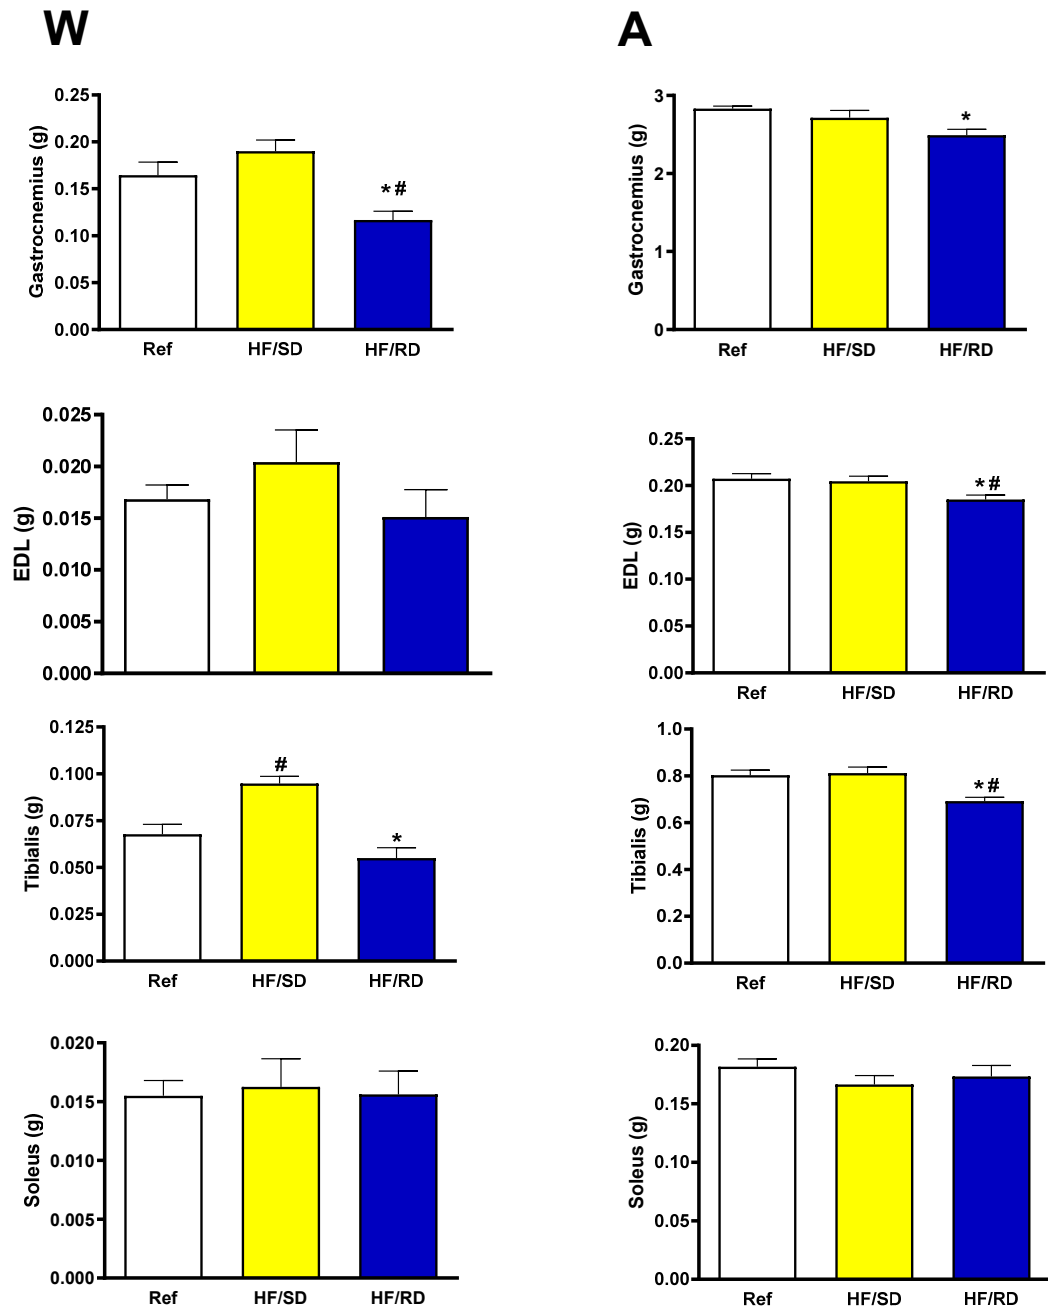

**Figure S1.** Muscle weight in the offspring. The muscle weight has been measured at weaning (W) and adolescence (A). Values are means  $\pm$  SEM (n=8 for each experimental group). HF/SD: offspring from mothers on high fat diet containing slow digesting carbohydrates; HF/RD: offspring from mothers on high fat diet containing rapid digesting carbohydrates; Ref: offspring from mothers on AIN93G diet. \* Significant difference with HF/SD group,  $p < 0.05$ . # Significant difference with reference group,  $p < 0.05$ . EDL: extensor digitorum longus.

**W**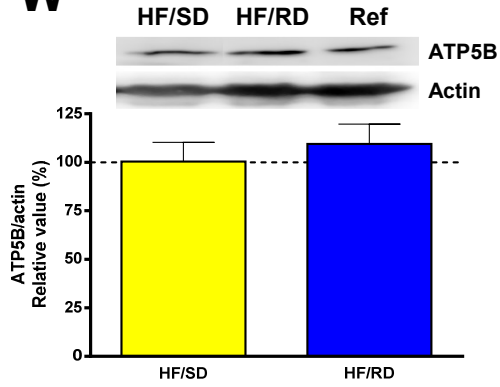**A**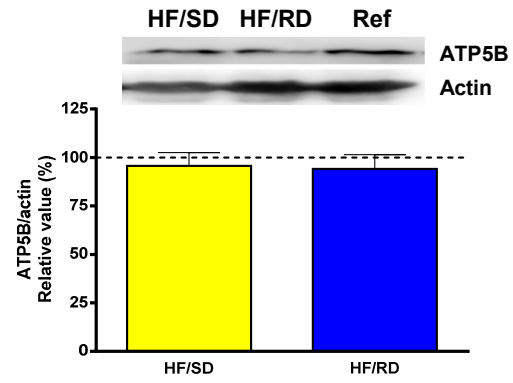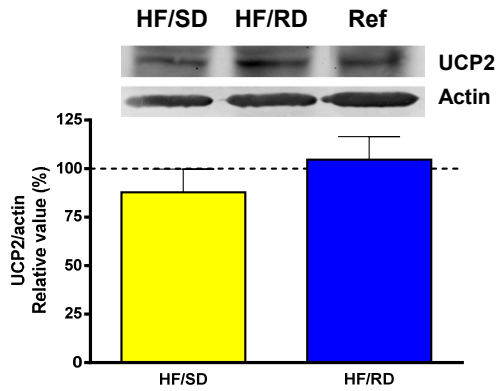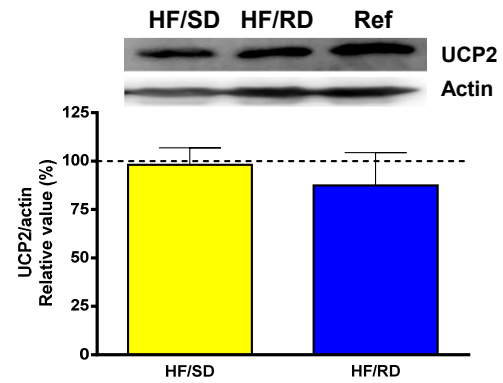

**Supplementary Figure S2.** Muscle ATPase subunit 5B (ATP5B) and the mitochondrial uncoupling protein 2 (UCP2) expression. Expression was assayed by Western blot in gastrocnemius muscle at weaning (W) and adolescence (A). Values are means  $\pm$  SEM (n=8 for each experimental group). HF/SD: offspring from mothers on high fat diet containing slow digesting carbohydrates; HF/RD: offspring from mothers on high fat diet containing rapid digesting carbohydrates; Ref: offspring from mothers on AIN93G diet. Line in all graphs shows reference group mean value. No significant differences were found.

Supplementary Materials Table S1. Composition of experimental diets

|                                                    | Reference diets |        | Obesogenic diet | Experimental diets |       |
|----------------------------------------------------|-----------------|--------|-----------------|--------------------|-------|
|                                                    | AIN93G          | AIN93M | HF              | HF/RD              | HF/SD |
| <b>Total Protein</b> <sup>a</sup><br>(g/100g diet) | 18.3            | 12.6   | 24.2            | 24.2               | 24.2  |
| Calcium caseinate (%)                              | 100             | 100    | 100             | 100                | 100   |
| <b>Total fat</b> <sup>b</sup><br>(g/100g diet)     | 7.0             | 4.0    | 20.5            | 20.5               | 20.5  |
| Plant oil (%)                                      | 100             | 100    |                 |                    |       |
| Lard fat (%)                                       |                 |        | 100             | 100                | 100   |
| <b>Total CHO</b><br>(g/100g diet)                  | 64.6            | 75.7   | 49.4            | 49.4               | 49.1  |
| Sugar <sup>c</sup>                                 |                 |        |                 |                    |       |
| Isomaltulose (%)                                   | -               | -      | -               | -                  | 67.9  |
| Sucrose (%)                                        | 14.4            | 13.5   | 56.0            | 81.9               | 5.5   |
| Rapid-digesting complex CHO <sup>c</sup>           |                 |        |                 |                    |       |
| Maltodextrin/Corn starch (%)                       | 78.4            | 79.7   | -               | -                  | 7.7   |
| Resistant maltodextrin (%)                         | -               | -      | 7.9             | -                  | 15.4  |
| Indigestible fiber <sup>c</sup>                    |                 |        |                 |                    |       |
| Fructooligosaccharides (%)                         | -               | -      | -               | 18.1               | 3.5   |
| Cellulose (%)                                      | 7.2             | 6.8    | -               | -                  | -     |

Individual (a) protein, (b) fat and (c) CHO composition is expressed as percentage of total protein, fat and CHO, respectively

## Supplementary Table S2. Biochemical Serum Parameters.

### Weaning

|                   | HF/SD Group | HF/RD Group  | Reference   |
|-------------------|-------------|--------------|-------------|
| Glycaemia (mg/dL) | 169.4 ± 4.7 | 163.1 ± 7.7  | 170.6 ± 4.2 |
| TG (mg/dL)        | 49.1 ± 4.5  | 85.8 ± 14.8* | 55.6 ± 7.7  |

### Adolescence

|                   | HF/SD Group | HF/RD Group  | Reference    |
|-------------------|-------------|--------------|--------------|
| Glycaemia (mg/dL) | 104.6 ± 5.0 | 119.0 ± 6.4  | 117.3 ± 12.8 |
| TG (mg/dL)        | 62.3 ± 5.2  | 123.2 ± 30.5 | 59.4 ± 5.9   |

(n=8) \* Significant difference with HF/SD group.

### Homeostasis model assessment (HOMA) at Adolescence

|                            | HF/SD Group    | HF/RD Group    | Reference      |
|----------------------------|----------------|----------------|----------------|
| AUC glycaemia (mg·min/dL)  | 25415 ± 857.8  | 28112 ± 1351   | 27391 ± 524.3  |
| AUC insulinemia (µg·min/L) | 341066 ± 25027 | 393824 ± 53570 | 359118 ± 30052 |
| HOMA (index)               | 5.72 ± 1.093   | 9.83 ± 2.425   | 9.875 ± 2.748  |

We have measured in the offspring of the different experimental groups a homeostasis model assessment (HOMA) as an index of insulin resistance, a meal tolerance test and during the test the plasma glucose and insulin levels have been quantitated (Martin, *et al. The Journal of nutritional biochemistry* **2018**, 61, 183-196). The results expressed as Area under the Curve (AUC) for the different groups (n=8). Proinsulinemic peak and total glycemic response were significantly lower in the HF/SD group compared with HF/RD group.

**Supplementary Material Table S3.** Expression arrays of mRNA samples from HF/SD and HF/RD animals at adolescence. A total of 1363 genes with higher than 1.5 fold change and  $p < 0.05$  were detected and from those, a subgroup of 507 well annotated genes were selected.

| M (log2 fold change) | Linear Fold Change | Increase/Decrease | Statistic | p-value    | Adjusted p-value | GeneName                                                                                   | Description                                                                                                                                        | Genbank Accession |
|----------------------|--------------------|-------------------|-----------|------------|------------------|--------------------------------------------------------------------------------------------|----------------------------------------------------------------------------------------------------------------------------------------------------|-------------------|
| 2.88                 | 7.34               | Increase          | 7.38      | 4.6793E-07 | 0.0121           | similar to alkaline phosphatase (EC 3.1.3.1) precursor, placental-like - human (predicted) | Rattus norvegicus similar to alkaline phosphatase precursor (LOC367308), mRNA [XM_346070]                                                          | XM_346070         |
| 2.11                 | 4.31               | Increase          | 7.25      | 6.0042E-07 | 0.0121           | ubiquitously transcribed tetratricopeptide repeat gene, X chromosome (predicted)           | PREDICTED: Rattus norvegicus ubiquitously transcribed tetratricopeptide repeat gene, X chromosome (predicted) (Utx_predicted), mRNA [XM_001055391] | XM_001055391      |
| 1.16                 | 2.23               | Increase          | 7.06      | 8.8496E-07 | 0.0121           | AI237189                                                                                   | AI237189 EST233751 Normalized rat ovary, Bento Soares Rattus sp. cDNA clone ROVDP71 3' end, mRNA sequence [AI237189]                               | AI237189          |
| 1.22                 | 2.33               | Increase          | 6.52      | 2.6988E-06 | 0.0184           | AA859053                                                                                   | AA859053 UI-R-A0-ak-e-04-0-UI.s1 UI-R-A0 Rattus norvegicus cDNA clone UI-R-A0-ak-e-04-0-UI 3', mRNA sequence [AA859053]                            | AA859053          |
| 2.01                 | 4.04               | Increase          | 6.51      | 2.758E-06  | 0.0184           | similar to Protein C6orf78 homolog                                                         | PREDICTED: Rattus norvegicus similar to Protein C6orf78 homolog (LOC499445), mRNA [XM_574768]                                                      | XM_574768         |
| -1.43                | 2.70               | Decrease          | -6.22     | 5.0911E-06 | 0.0184           | RGD1308297                                                                                 | Rattus norvegicus similar to CG10084-PA (LOC306137), mRNA [XM_224510]                                                                              | XM_224510         |
| -1.22                | 2.32               | Decrease          | -6.03     | 7.527E-06  | 0.0184           | BF556301                                                                                   | BF556301 UI-R-A1-en-d-10-0-UI.r1 UI-R-A1 Rattus norvegicus cDNA                                                                                    | BF556301          |

|              |      |          |       |            |        |                                                                |                                                                                                                                 |              |
|--------------|------|----------|-------|------------|--------|----------------------------------------------------------------|---------------------------------------------------------------------------------------------------------------------------------|--------------|
|              |      |          |       |            |        |                                                                | clone UI-R-A1-en-d-10-0-UI 5', mRNA sequence [BF556301]                                                                         |              |
| <b>-1.02</b> | 2.03 | Decrease | -5.91 | 9.9477E-06 | 0.0207 | TC552847                                                       | APC_RAT (P70478) Adenomatous polyposis coli protein (APC protein), complete [TC552847]                                          |              |
| <b>1.78</b>  | 3.44 | Increase | 5.88  | 1.0397E-05 | 0.0207 | hypothetical protein LOC685924                                 | PREDICTED: Rattus norvegicus hypothetical protein LOC685924 (LOC685924), mRNA [XM_001065777]                                    | XM_001065777 |
| <b>1.04</b>  | 2.05 | Increase | 5.84  | 1.1437E-05 | 0.0207 | BE106074                                                       | BE106074 UI-R-BO1-ask-f-04-0-UI.s1 UI-R-BO1 Rattus norvegicus cDNA clone UI-R-BO1-ask-f-04-0-UI 3', mRNA sequence [BE106074]    | BE106074     |
| <b>-1.21</b> | 2.32 | Decrease | -5.78 | 1.3075E-05 | 0.0207 | AA998118                                                       | AA998118 UI-R-C0-hx-c-06-0-UI.s1 UI-R-C0 Rattus norvegicus cDNA clone UI-R-C0-hx-c-06-0-UI 3', mRNA sequence [AA998118]         | AA998118     |
| <b>1.19</b>  | 2.29 | Increase | 5.73  | 1.4431E-05 | 0.0207 | similar to Der1-like domain family, member 1                   | PREDICTED: Rattus norvegicus similar to Der1-like domain family, member 1 (LOC689741), mRNA [XM_001071836]                      | XM_001071836 |
| <b>2.30</b>  | 4.93 | Increase | 5.73  | 1.4671E-05 | 0.0207 | tryptase alpha/beta 1                                          | Rattus norvegicus tryptase alpha/beta 1 (Tpsab1), mRNA [NM_019322]                                                              | NM_019322    |
| <b>1.83</b>  | 3.56 | Increase | 5.72  | 1.4887E-05 | 0.0207 | SH2 domain containing phosphatase anchor protein 1 (predicted) | PREDICTED: Rattus norvegicus SH2 domain containing phosphatase anchor protein 1 (predicted) (Spap1_predicted), mRNA [XM_227483] | XM_227483    |
| <b>2.06</b>  | 4.18 | Increase | 5.55  | 2.182E-05  | 0.0263 | olfactory receptor 567 (predicted)                             | Rattus norvegicus olfactory receptor 567 (predicted) (Olr567_predicted), mRNA [NM_001000326]                                    | NM_001000326 |
| <b>-1.82</b> | 3.54 | Decrease | -5.52 | 2.3065E-05 | 0.0263 | BF523141                                                       | BF523141 UI-R-C3-sl-b-09-0-UI.r1 UI-R-C3 Rattus norvegicus cDNA clone                                                           | BF523141     |

|              |      |                 |       |            |        |                                               |                                                                                                                                                   |           |
|--------------|------|-----------------|-------|------------|--------|-----------------------------------------------|---------------------------------------------------------------------------------------------------------------------------------------------------|-----------|
|              |      |                 |       |            |        |                                               | UI-R-C3-sl-b-09-0-UI 5', mRNA sequence [BF523141]                                                                                                 |           |
| <b>1.63</b>  | 3.09 | <b>Increase</b> | 5.42  | 2.8987E-05 | 0.0290 | AI171355                                      | AI171355 EST217310 Normalized rat muscle, Bento Soares Rattus sp. cDNA clone RMUBJ63 3' end, mRNA sequence [AI171355]                             | AI171355  |
| <b>1.46</b>  | 2.75 | <b>Increase</b> | 5.39  | 3.0771E-05 | 0.0300 | cyclin-dependent kinase inhibitor 1C (P57)    | Rattus norvegicus cyclin-dependent kinase inhibitor 1C (P57) (Cdkn1c), transcript variant 3, mRNA [NM_182735]                                     | NM_182735 |
| <b>-1.07</b> | 2.10 | <b>Decrease</b> | -5.36 | 3.274E-05  | 0.0312 | AW144111                                      | AW144111 EST294407 Normalized rat embryo, Bento Soares Rattus sp. cDNA clone RGIC134 5' end, mRNA sequence [AW144111]                             | AW144111  |
| <b>-1.22</b> | 2.32 | <b>Decrease</b> | -5.31 | 3.6921E-05 | 0.0329 | AW916157                                      | AW916157 EST347461 Rat gene index, normalized rat, norvegicus, Bento Soares Rattus norvegicus cDNA clone RGIDI75 5' end, mRNA sequence [AW916157] | AW916157  |
| <b>-1.02</b> | 2.02 | <b>Decrease</b> | -5.27 | 4.0501E-05 | 0.0339 | AI102821                                      | AI102821 EST212110 Normalized rat embryo, Bento Soares Rattus sp. cDNA clone REMBT30 3' end, mRNA sequence [AI102821]                             | AI102821  |
| <b>-1.12</b> | 2.17 | <b>Decrease</b> | -5.24 | 4.289E-05  | 0.0339 | TC520328                                      | Unknown                                                                                                                                           |           |
| <b>1.96</b>  | 3.89 | <b>Increase</b> | 5.20  | 4.7236E-05 | 0.0339 | calcium/calmodulin-dependent protein kinase I | Rattus norvegicus calcium/calmodulin-dependent protein kinase I (Camk1), mRNA [NM_134468]                                                         | NM_134468 |
| <b>1.69</b>  | 3.22 | <b>Increase</b> | 5.19  | 4.8002E-05 | 0.0339 | sialic acid acetyltransferase (predicted)     | PREDICTED: Rattus norvegicus sialic acid acetyltransferase (predicted) (Siae_predicted), mRNA [XM_343373]                                         | XM_343373 |



|              |      |                 |       |            |        |                                                          |                                                                                                                   |              |
|--------------|------|-----------------|-------|------------|--------|----------------------------------------------------------|-------------------------------------------------------------------------------------------------------------------|--------------|
| <b>1.93</b>  | 3.82 | <b>Increase</b> | 5.11  | 5.7646E-05 | 0.0347 | matrix metallopeptidase 2                                | Rattus norvegicus matrix metallopeptidase 2 (Mmp2), mRNA [NM_031054]                                              | NM_031054    |
| <b>1.49</b>  | 2.82 | <b>Increase</b> | 5.10  | 5.86E-05   | 0.0347 | G-protein signalling modulator 1 (AGS3-like, C. elegans) | Rattus norvegicus G-protein signalling modulator 1 (AGS3-like, C. elegans) (Gpsm1), mRNA [NM_144745]              | NM_144745    |
| <b>1.24</b>  | 2.36 | <b>Increase</b> | 5.09  | 6.0282E-05 | 0.0347 | protein phosphatase 4, catalytic subunit                 | Rattus norvegicus protein phosphatase 4, catalytic subunit (Ppp4c), mRNA [NM_134359]                              | NM_134359    |
| <b>1.27</b>  | 2.41 | <b>Increase</b> | 5.04  | 6.7496E-05 | 0.0360 | CXXC finger 5                                            | PREDICTED: Rattus norvegicus similar to CXXC finger 5 (LOC681300), mRNA [XM_001061130]                            | XM_001061130 |
| <b>-1.45</b> | 2.73 | <b>Decrease</b> | -5.04 | 6.8405E-05 | 0.0360 | centrosome-associated protein 350                        | PREDICTED: Rattus norvegicus centrosome-associated protein 350 (Cap350), mRNA [XM_001067472]                      | XM_001067472 |
| <b>2.23</b>  | 4.69 | <b>Increase</b> | 5.00  | 7.3874E-05 | 0.0379 | XM_216797                                                | Rattus norvegicus hypothetical LOC299350 (LOC299350), mRNA [XM_216797]                                            | XM_216797    |
| <b>1.56</b>  | 2.95 | <b>Increase</b> | 4.96  | 8.0953E-05 | 0.0394 | Hist1h2an_predicted                                      | PREDICTED: Rattus norvegicus histone 1, H2an (predicted) (Hist1h2an_predicted), mRNA [XM_225386]                  | XM_225386    |
| <b>1.48</b>  | 2.80 | <b>Increase</b> | 4.96  | 8.1351E-05 | 0.0394 | AF010441                                                 | Rattus norvegicus MARRLC6A mRNA, partial cds. [AF010441]                                                          | AF010441     |
| <b>-1.77</b> | 3.42 | <b>Decrease</b> | -4.84 | 0.00010713 | 0.0448 | DY472414                                                 | RVL23737 Wackym-Soares normalized rat vestibular cDNA library Rattus norvegicus cDNA 5', mRNA sequence [DY472414] | DY472414     |
| <b>1.06</b>  | 2.09 | <b>Increase</b> | 4.81  | 0.00011444 | 0.0454 | zinc finger, DHHC domain containing 18                   | Rattus norvegicus zinc finger, DHHC domain containing 18 (Zdhhc18), mRNA [NM_001039339]                           | NM_001039339 |

|              |       |                 |       |            |        |                                                     |                                                                                                                             |              |
|--------------|-------|-----------------|-------|------------|--------|-----------------------------------------------------|-----------------------------------------------------------------------------------------------------------------------------|--------------|
| <b>2.76</b>  | 6.77  | <b>Increase</b> | 4.79  | 0.00012011 | 0.0456 | FBJ osteosarcoma oncogene B                         | PREDICTED: Rattus norvegicus FBJ osteosarcoma oncogene B (Fosb), mRNA [XM_001057199]                                        | XM_001057199 |
| <b>-2.35</b> | 5.09  | <b>Decrease</b> | -4.77 | 0.00012372 | 0.0464 | mutL homolog 1 (E. coli)                            | Rattus norvegicus mutL homolog 1 (E. coli) (Mlh1), mRNA [NM_031053]                                                         | NM_031053    |
| <b>2.29</b>  | 4.91  | <b>Increase</b> | 4.76  | 0.00012677 | 0.0464 | actin, gamma 2                                      | Rattus norvegicus actin, gamma 2 (Actg2), mRNA [NM_012893]                                                                  | NM_012893    |
| <b>1.57</b>  | 2.97  | <b>Increase</b> | 4.73  | 0.00013583 | 0.0470 | XM_345216                                           | Rattus norvegicus similar to Ab2-162 (LOC365803), mRNA [XM_345216]                                                          | XM_345216    |
| <b>4.30</b>  | 19.69 | <b>Increase</b> | 4.73  | 0.00013646 | 0.0470 | Myh11                                               | PREDICTED: Rattus norvegicus myosin, heavy polypeptide 11, smooth muscle, transcript variant 1 (Myh11), mRNA [XM_001053321] | XM_001053321 |
| <b>1.23</b>  | 2.35  | <b>Increase</b> | 4.72  | 0.00014086 | 0.0470 | similar to ribosomal protein L13                    | PREDICTED: Rattus norvegicus similar to ribosomal protein L13 (LOC680938), mRNA [XM_001059551]                              | XM_001059551 |
| <b>-1.08</b> | 2.11  | <b>Decrease</b> | -4.71 | 0.00014341 | 0.0470 | BF550737                                            | BF550737 UI-R-C0-jk-c-04-0-UI.r1 UI-R-C0 Rattus norvegicus cDNA clone UI-R-C0-jk-c-04-0-UI 5', mRNA sequence [BF550737]     | BF550737     |
| <b>-1.67</b> | 3.18  | <b>Decrease</b> | -4.70 | 0.00014738 | 0.0470 | TC548806                                            | S79979 ribosomal protein L37 {Homo sapiens;}, partial (85%) [TC548806]                                                      |              |
| <b>1.53</b>  | 2.89  | <b>Increase</b> | 4.68  | 0.00015479 | 0.0478 | Hermansky-Pudlak syndrome 1 homolog (human)         | Rattus norvegicus Hermansky-Pudlak syndrome 1 homolog (human) (Hps1), mRNA [NM_040669]                                      | NM_040669    |
| <b>-1.48</b> | 2.79  | <b>Decrease</b> | -4.64 | 0.00016679 | 0.0496 | ATP-binding cassette, sub-family A (ABC1), member 7 | Rattus norvegicus ATP-binding cassette, sub-family A (ABC1), member 7 (Abca7), mRNA [NM_207598]                             | NM_207598    |
| <b>-2.11</b> | 4.32  | <b>Decrease</b> | -4.62 | 0.00017752 | 0.0509 | Sh3bp1                                              | PREDICTED: Rattus norvegicus reg I binding protein I (Rbp1), mRNA [XM_235500]                                               | XM_235500    |

|              |      |                 |       |            |        |                                                                                      |                                                                                                                                                                                       |              |
|--------------|------|-----------------|-------|------------|--------|--------------------------------------------------------------------------------------|---------------------------------------------------------------------------------------------------------------------------------------------------------------------------------------|--------------|
| <b>1.47</b>  | 2.77 | <b>Increase</b> | 4.61  | 0.00018103 | 0.0516 | AI233279                                                                             | AI233279 EST229967 Normalized rat kidney, Bento Soares Rattus sp. cDNA clone RKIDD12 3' end, mRNA sequence [AI233279]                                                                 | AI233279     |
| <b>3.05</b>  | 8.31 | <b>Increase</b> | 4.60  | 0.00018317 | 0.0518 | claudin 23                                                                           | Rattus norvegicus claudin 23 (Cldn23), mRNA [NM_001033062]                                                                                                                            | NM_001033062 |
| <b>1.36</b>  | 2.57 | <b>Increase</b> | 4.59  | 0.00019031 | 0.0531 | similar to Williams-Beuren syndrome critical region protein 28 isoform A (predicted) | PREDICTED: Rattus norvegicus similar to Williams-Beuren syndrome critical region protein 28 isoform A (predicted) (RGD1561903_predicted), mRNA [XM_213758]                            | XM_213758    |
| <b>1.56</b>  | 2.95 | <b>Increase</b> | 4.58  | 0.00019306 | 0.0531 | XM_214608                                                                            | Rattus norvegicus similar to FH1/FH2 domains-containing protein (Formin homolog overexpressed in spleen) (FHOS) (Formin homology 2 domain containing 1) (LOC291731), mRNA [XM_214608] | XM_214608    |
| <b>-1.06</b> | 2.09 | <b>Decrease</b> | -4.52 | 0.00022176 | 0.0576 | TC563522                                                                             | Q6XKT3 (Q6XKT3) Long-wavelength rhodopsin (Fragment), partial (6%) [TC563522]                                                                                                         |              |
| <b>2.00</b>  | 3.99 | <b>Increase</b> | 4.49  | 0.00023953 | 0.0585 | similar to histone 2a                                                                | PREDICTED: Rattus norvegicus similar to histone 2a (LOC682543), mRNA [XM_001061959]                                                                                                   | XM_001061959 |
| <b>2.49</b>  | 5.60 | <b>Increase</b> | 4.48  | 0.0002458  | 0.0590 | guanylate cyclase 2g                                                                 | Rattus norvegicus guanylate cyclase 2g (Gucy2g), mRNA [NM_139042]                                                                                                                     | NM_139042    |
| <b>1.51</b>  | 2.85 | <b>Increase</b> | 4.47  | 0.00024737 | 0.0590 | PEF protein with a long N-terminal hydrophobic domain                                | Rattus norvegicus PEF protein with a long N-terminal hydrophobic domain (Peflin), mRNA [NM_001007651]                                                                                 | NM_001007651 |
| <b>1.00</b>  | 2.00 | <b>Increase</b> | 4.47  | 0.00025114 | 0.0595 | cleavage and polyadenylation specific factor 5                                       | Rattus norvegicus cleavage and polyadenylation specific factor 5 (Cpsf5), mRNA [NM_001039004]                                                                                         | NM_001039004 |
| <b>-1.11</b> | 2.16 | <b>Decrease</b> | -4.45 | 0.00026288 | 0.0608 | Smarca4                                                                              | PREDICTED: Rattus norvegicus SWI/SNF related, matrix associated,                                                                                                                      | XM_343358    |

|              |      |          |       |            |        |                                                                            |                                                                                                                                                  |           |
|--------------|------|----------|-------|------------|--------|----------------------------------------------------------------------------|--------------------------------------------------------------------------------------------------------------------------------------------------|-----------|
|              |      |          |       |            |        |                                                                            | actin dependent regulator of chromatin, subfamily a, member 4 (Smarca4), mRNA [XM_343358]                                                        |           |
| <b>-1.46</b> | 2.75 | Decrease | -4.43 | 0.00027021 | 0.0618 | similar to MYST histone acetyltransferase monocytic leukemia 4 (predicted) | PREDICTED: Rattus norvegicus similar to MYST histone acetyltransferase monocytic leukemia 4 (predicted) (RGD1566399_predicted), mRNA [XR_008228] | XR_008228 |
| <b>1.45</b>  | 2.72 | Increase | 4.43  | 0.0002722  | 0.0618 | similar to mast cell protease 1-like 3 precursor (predicted)               | PREDICTED: Rattus norvegicus similar to mast cell protease 1-like 3 precursor (predicted) (RGD1562035_predicted), mRNA [XM_224209]               | XM_224209 |
| <b>-2.17</b> | 4.51 | Decrease | -4.41 | 0.00028266 | 0.0627 | TC549700                                                                   | Q9ERK2 (Q9ERK2) Neprilysin-like peptidase gamma, partial (5%) [TC549700]                                                                         |           |
| <b>-1.22</b> | 2.34 | Decrease | -4.34 | 0.00033574 | 0.0679 | TC550497                                                                   | Q8R4C3 (Q8R4C3) Csr1, partial (40%) [TC550497]                                                                                                   |           |
| <b>1.16</b>  | 2.24 | Increase | 4.32  | 0.00034971 | 0.0690 | M16349                                                                     | Rat asialoglycoprotein receptor RHL1 mRNA, 5' end. [M16349]                                                                                      | M16349    |
| <b>-1.73</b> | 3.31 | Decrease | -4.32 | 0.00035276 | 0.0692 | BF564899                                                                   | BF564899 UI-R-BU0-ana-b-07-0-UI.r1 UI-R-BU0 Rattus norvegicus cDNA clone UI-R-BU0-ana-b-07-0-UI 5', mRNA sequence [BF564899]                     | BF564899  |
| <b>-2.06</b> | 4.16 | Decrease | -4.31 | 0.00035858 | 0.0693 | DV719627                                                                   | RVL10432 Wackym-Soares normalized rat vestibular cDNA library Rattus norvegicus cDNA 5', mRNA sequence [DV719627]                                | DV719627  |
| <b>-1.05</b> | 2.07 | Decrease | -4.30 | 0.00036884 | 0.0696 | similar to CG3064-PB (predicted)                                           | PREDICTED: Rattus norvegicus similar to CG3064-PB (predicted) (RGD1564844_predicted), mRNA [XM_236851]                                           | XM_236851 |

|       |      |          |       |            |        |                                                                                 |                                                                                                                                                     |              |
|-------|------|----------|-------|------------|--------|---------------------------------------------------------------------------------|-----------------------------------------------------------------------------------------------------------------------------------------------------|--------------|
| -1.73 | 3.31 | Decrease | -4.30 | 0.00037217 | 0.0696 | BF558804                                                                        | BF558804 UI-R-A1-du-a-12-0-UI.r1 UI-R-A1 Rattus norvegicus cDNA clone UI-R-A1-du-a-12-0-UI 5', mRNA sequence [BF558804]                             | BF558804     |
| -1.41 | 2.65 | Decrease | -4.29 | 0.00037713 | 0.0697 | hypothetical protein LOC690208                                                  | PREDICTED: Rattus norvegicus hypothetical protein LOC690208 (LOC690208), mRNA [XM_001073671]                                                        | XM_001073671 |
| -1.39 | 2.63 | Decrease | -4.28 | 0.00038644 | 0.0708 | procollagen, type IV, alpha 3 (Goodpasture antigen) binding protein (predicted) | PREDICTED: Rattus norvegicus procollagen, type IV, alpha 3 (Goodpasture antigen) binding protein (predicted) (Col4a3bp_predicted), mRNA [XM_345143] | XM_345143    |
| 1.56  | 2.95 | Increase | 4.26  | 0.00039962 | 0.0718 | ectonucleotide pyrophosphatase/phosphodiesterase 2                              | Rattus norvegicus ectonucleotide pyrophosphatase/phosphodiesterase 2 (Enpp2), mRNA [NM_057104]                                                      | NM_057104    |
| -1.96 | 3.90 | Decrease | -4.26 | 0.00040093 | 0.0718 | similar to RIKEN cDNA 4931426K16 gene                                           | Rattus norvegicus similar to RIKEN cDNA 4931426K16 gene (RGD1311267), mRNA [NM_001039024]                                                           | NM_001039024 |
| 1.21  | 2.32 | Increase | 4.26  | 0.0004038  | 0.0720 | cholecystokinin                                                                 | Rattus norvegicus cholecystokinin (Cck), mRNA [NM_012829]                                                                                           | NM_012829    |
| 1.21  | 2.32 | Increase | 4.25  | 0.00041561 | 0.0732 | gamma-aminobutyric acid (GABA) B receptor 1                                     | Rattus norvegicus gamma-aminobutyric acid (GABA) B receptor 1 (Gabbr1), mRNA [NM_031028]                                                            | NM_031028    |
| 1.48  | 2.80 | Increase | 4.22  | 0.00044035 | 0.0738 | PHD finger protein 7                                                            | Rattus norvegicus PHD finger protein 7 (Phf7), mRNA [NM_001012211]                                                                                  | NM_001012211 |
| -1.18 | 2.26 | Decrease | -4.21 | 0.00045725 | 0.0759 | TC520546                                                                        | K13A_MOUSE (Q9EQW7) Kinesin-like protein KIF13A, partial (3%) [TC520546]                                                                            |              |
| 1.38  | 2.60 | Increase | 4.20  | 0.00046518 | 0.0759 | BG671620                                                                        | DRNBVF01 Rat DRG Library Rattus norvegicus cDNA clone DRNBVF01 5', mRNA sequence [BG671620]                                                         | BG671620     |

|              |      |                 |       |            |        |                                                   |                                                                                                                            |              |
|--------------|------|-----------------|-------|------------|--------|---------------------------------------------------|----------------------------------------------------------------------------------------------------------------------------|--------------|
| <b>1.24</b>  | 2.36 | <b>Increase</b> | 4.16  | 0.00050398 | 0.0801 | ADP-ribosylation factor 6                         | Rattus norvegicus ADP-ribosylation factor 6 (Arf6), mRNA [NM_024152]                                                       | NM_024152    |
| <b>1.49</b>  | 2.81 | <b>Increase</b> | 4.15  | 0.00051937 | 0.0814 | adaptor protein complex AP-1, sigma 1 (predicted) | PREDICTED: Rattus norvegicus adaptor protein complex AP-1, sigma 1 (predicted) (Ap1s1_predicted), mRNA [XM_341052]         | XM_341052    |
| <b>-1.73</b> | 3.31 | <b>Decrease</b> | -4.14 | 0.00053057 | 0.0817 | cadmium-inducible gene 1L                         | Rattus norvegicus cadmium-inducible gene 1L (Cdig1l), mRNA [NM_153623]                                                     | NM_153623    |
| <b>1.38</b>  | 2.61 | <b>Increase</b> | 4.13  | 0.00054924 | 0.0823 | aquaporin 2                                       | Rattus norvegicus aquaporin 2 (Aqp2), mRNA [NM_012909]                                                                     | NM_012909    |
| <b>3.06</b>  | 8.32 | <b>Increase</b> | 4.10  | 0.00058874 | 0.0840 | plasticity-related protein PRG-2                  | Rattus norvegicus plasticity-related protein PRG-2 (Prg-2), mRNA [NM_181634]                                               | NM_181634    |
| <b>1.91</b>  | 3.75 | <b>Increase</b> | 4.09  | 0.00059779 | 0.0848 | similar to JM11 protein (predicted)               | PREDICTED: Rattus norvegicus similar to JM11 protein (predicted) (RGD1561596_predicted), mRNA [XM_228761]                  | XM_228761    |
| <b>-1.35</b> | 2.55 | <b>Decrease</b> | -4.05 | 0.00065577 | 0.0898 | PHD finger protein 17 (predicted)                 | PREDICTED: Rattus norvegicus PHD finger protein 17 (predicted) (Phf17_predicted), mRNA [XM_227074]                         | XM_227074    |
| <b>-1.33</b> | 2.52 | <b>Decrease</b> | -4.05 | 0.00066161 | 0.0898 | speedy homolog 1 (Drosophila)                     | Rattus norvegicus speedy homolog 1 (Drosophila) (Spdy1), mRNA [NM_138855]                                                  | NM_138855    |
| <b>-2.30</b> | 4.93 | <b>Decrease</b> | -4.04 | 0.00066878 | 0.0898 | LOC682316                                         | PREDICTED: Rattus norvegicus similar to dystrophin, muscular dystrophy (LOC682316), mRNA [XM_001060977]                    | XM_001060977 |
| <b>2.58</b>  | 5.98 | <b>Increase</b> | 4.03  | 0.00069304 | 0.0920 | AI145447                                          | AI145447 UI-R-BT0-pv-d-09-0-UI.s1 UI-R-BT0 Rattus norvegicus cDNA clone UI-R-BT0-pv-d-09-0-UI 3', mRNA sequence [AI145447] | AI145447     |

|       |       |          |       |            |        |                                                         |                                                                                                                                         |              |
|-------|-------|----------|-------|------------|--------|---------------------------------------------------------|-----------------------------------------------------------------------------------------------------------------------------------------|--------------|
| -1.18 | 2.27  | Decrease | -4.02 | 0.00070638 | 0.0935 | Obscn                                                   | PREDICTED: Rattus norvegicus obscurin, cytoskeletal calmodulin and titin-interacting RhoGEF (Obscn), mRNA [XM_001076876]                | XM_001076876 |
| -1.18 | 2.27  | Decrease | -4.00 | 0.00073898 | 0.0959 | zinc and ring finger 1 (predicted)                      | PREDICTED: Rattus norvegicus zinc and ring finger 1 (predicted) (Znrf1_predicted), mRNA [XM_342692]                                     | XM_342692    |
| 1.07  | 2.10  | Increase | 3.98  | 0.00076446 | 0.0973 | hairy and enhancer of split 7 (Drosophila) (predicted)  | PREDICTED: Rattus norvegicus hairy and enhancer of split 7 (Drosophila) (predicted) (Hes7_predicted), mRNA [XM_220597]                  | XM_220597    |
| -1.45 | 2.73  | Decrease | -3.98 | 0.00076636 | 0.0973 | synaptojanin 1                                          | PREDICTED: Rattus norvegicus synaptojanin 1 (Synj1), mRNA [XM_573256]                                                                   | XM_573256    |
| -1.27 | 2.41  | Decrease | -3.96 | 0.00080322 | 0.0998 | chromodomain helicase DNA binding protein 1 (predicted) | PREDICTED: Rattus norvegicus chromodomain helicase DNA binding protein 1 (predicted) (Chd1_predicted), mRNA [XM_001056703]              | XM_001056703 |
| 4.28  | 19.38 | Increase | 3.96  | 0.00080346 | 0.0998 | RGD1562348_predicted                                    | PREDICTED: Rattus norvegicus similar to ankyrin repeat domain protein 17 isoform b (predicted) (RGD1562348_predicted), mRNA [XM_214012] | XM_214012    |
| -1.65 | 3.14  | Decrease | -3.95 | 0.00081997 | 0.1002 | G protein-coupled receptor associated sorting protein 1 | Rattus norvegicus G protein-coupled receptor associated sorting protein 1 (Gprasp1), mRNA [NM_134386]                                   | NM_134386    |
| 2.52  | 5.74  | Increase | 3.94  | 0.00084378 | 0.1003 | cell division cycle 20 homolog (S. cerevisiae)          | Rattus norvegicus cell division cycle 20 homolog (S. cerevisiae) (Cdc20), mRNA [NM_171993]                                              | NM_171993    |
| 2.12  | 4.35  | Increase | 3.93  | 0.0008566  | 0.1010 | TC522745                                                | Q7S3E7 (Q7S3E7) Predicted protein, partial (3%) [TC522745]                                                                              |              |

|              |      |          |       |            |        |                                                      |                                                                                                                                     |              |
|--------------|------|----------|-------|------------|--------|------------------------------------------------------|-------------------------------------------------------------------------------------------------------------------------------------|--------------|
| <b>-1.10</b> | 2.15 | Decrease | -3.92 | 0.00088171 | 0.1024 | XM_223541                                            | Rattus norvegicus similar to leucine zipper-EF-hand containing transmembrane protein 1 (LOC305457), mRNA [XM_223541]                | XM_223541    |
| <b>1.33</b>  | 2.52 | Increase | 3.91  | 0.00090969 | 0.1039 | procollagen, type 1, alpha 1                         | PREDICTED: Rattus norvegicus procollagen, type 1, alpha 1 (Col1a1), mRNA [XM_213440]                                                | XM_213440    |
| <b>1.04</b>  | 2.06 | Increase | 3.91  | 0.00091381 | 0.1041 | CF110073                                             | Shultzomica03324 Rat lung airway and parenchyma cDNA libraries Rattus norvegicus cDNA clone Contig2930 5', mRNA sequence [CF110073] | CF110073     |
| <b>1.58</b>  | 2.98 | Increase | 3.90  | 0.00091995 | 0.1045 | receptor (calcitonin) activity modifying protein 2   | Rattus norvegicus receptor (calcitonin) activity modifying protein 2 (Ramp2), mRNA [NM_031646]                                      | NM_031646    |
| <b>1.27</b>  | 2.41 | Increase | 3.90  | 0.00092814 | 0.1046 | mitochondrial tumor suppressor 1                     | Rattus norvegicus mitochondrial tumor suppressor 1, mRNA (cDNA clone IMAGE:7104732), complete cds. [BC072537]                       | BC072537     |
| <b>-2.50</b> | 5.64 | Decrease | -3.88 | 0.00098027 | 0.1066 | homeodomain interacting protein kinase 2 (predicted) | Rattus norvegicus similar to nuclear body associated kinase 1a (LOC362342), mRNA [XM_342662]                                        | XM_342662    |
| <b>-1.47</b> | 2.77 | Decrease | -3.87 | 0.00099969 | 0.1074 | stonin 2 (predicted)                                 | PREDICTED: Rattus norvegicus stonin 2 (predicted) (Ston2_predicted), mRNA [XM_234454]                                               | XM_234454    |
| <b>-1.61</b> | 3.05 | Decrease | -3.86 | 0.00101486 | 0.1080 | putative aminopeptidase Fxna                         | Rattus norvegicus putative aminopeptidase Fxna (Fxna), mRNA [NM_184050]                                                             | NM_184050    |
| <b>-1.16</b> | 2.24 | Decrease | -3.84 | 0.00105296 | 0.1082 | similar to NFkB interacting protein 1                | PREDICTED: Rattus norvegicus similar to NFkB interacting protein 1 (LOC686781), mRNA [XM_001075705]                                 | XM_001075705 |



|              |      |          |       |            |        |                                                            |                                                                                                                                                   |              |
|--------------|------|----------|-------|------------|--------|------------------------------------------------------------|---------------------------------------------------------------------------------------------------------------------------------------------------|--------------|
| <b>-1.01</b> | 2.02 | Decrease | -3.84 | 0.00105614 | 0.1083 | LOC682690                                                  | PREDICTED: Rattus norvegicus similar to chromodomain helicase DNA binding protein 9, transcript variant 1 (LOC682690), mRNA [XM_001062637]        | XM_001062637 |
| <b>1.23</b>  | 2.34 | Increase | 3.84  | 0.00107011 | 0.1089 | AW530281                                                   | UI-R-BU0-amu-g-07-0-UI.s1 UI-R-BU0 Rattus norvegicus cDNA clone UI-R-BU0-amu-g-07-0-UI 3', mRNA sequence [AW530281]                               | AW530281     |
| <b>-1.04</b> | 2.05 | Decrease | -3.82 | 0.0011046  | 0.1092 | Arsk                                                       | PREDICTED: Rattus norvegicus arylsulfatase K (Arsk), mRNA [XM_001059083]                                                                          | XM_001059083 |
| <b>2.11</b>  | 4.33 | Increase | 3.82  | 0.00110929 | 0.1094 | similar to HOX11L2 (predicted)                             | PREDICTED: Rattus norvegicus similar to HOX11L2 (predicted) (RGD1564190_predicted), mRNA [XM_573065]                                              | XM_573065    |
| <b>1.02</b>  | 2.03 | Increase | 3.82  | 0.00111461 | 0.1094 | similar to Dynamin-binding protein (Scaffold protein Tuba) | PREDICTED: Rattus norvegicus similar to Dynamin-binding protein (Scaffold protein Tuba) (LOC309362), mRNA [XM_219860]                             | XM_219860    |
| <b>-1.12</b> | 2.17 | Decrease | -3.82 | 0.00111814 | 0.1094 | AW921244                                                   | AW921244 EST352548 Rat gene index, normalized rat, norvegicus, Bento Soares Rattus norvegicus cDNA clone RGIHQ07 5' end, mRNA sequence [AW921244] | AW921244     |
| <b>-1.20</b> | 2.30 | Decrease | -3.81 | 0.00112796 | 0.1094 | XM_215481                                                  | Rattus norvegicus similar to DEAH (Asp-Glu-Ala-His) box polypeptide 29; nucleic acid helicase DDXx (LOC294741), mRNA [XM_215481]                  | XM_215481    |
| <b>-1.39</b> | 2.62 | Decrease | -3.80 | 0.00115426 | 0.1103 | CASP8 and FADD-like apoptosis regulator                    | Rattus norvegicus CASP8 and FADD-like apoptosis regulator (Cflar), transcript variant 2, mRNA [NM_057138]                                         | NM_057138    |

|              |      |          |       |            |        |                                                   |                                                                                                                                                   |              |
|--------------|------|----------|-------|------------|--------|---------------------------------------------------|---------------------------------------------------------------------------------------------------------------------------------------------------|--------------|
| <b>-1.44</b> | 2.71 | Decrease | -3.79 | 0.00120723 | 0.1121 | AA997849                                          | UI-R-C0-hu-b-07-0-UI.s1 UI-R-C0 Rattus norvegicus cDNA clone UI-R-C0-hu-b-07-0-UI 3', mRNA sequence [AA997849]                                    | AA997849     |
| <b>-1.62</b> | 3.08 | Decrease | -3.78 | 0.00120978 | 0.1121 | DV725773                                          | RVL17751 Wackym-Soares normalized rat vestibular cDNA library Rattus norvegicus cDNA 5', mRNA sequence [DV725773]                                 | DV725773     |
| <b>-1.50</b> | 2.84 | Decrease | -3.76 | 0.00127446 | 0.1153 | AW917250                                          | AW917250 EST348554 Rat gene index, normalized rat, norvegicus, Bento Soares Rattus norvegicus cDNA clone RGIEB30 5' end, mRNA sequence [AW917250] | AW917250     |
| <b>1.65</b>  | 3.14 | Increase | 3.76  | 0.00128684 | 0.1153 | forkhead-like 18 (Drosophila)                     | Rattus norvegicus forkhead-like 18 (Drosophila) (Fkhl18), mRNA [NM_001012091]                                                                     | NM_001012091 |
| <b>1.14</b>  | 2.21 | Increase | 3.75  | 0.00131277 | 0.1163 | similar to RIKEN cDNA 1300007B12; clone MNCb-2755 | Rattus norvegicus similar to RIKEN cDNA 1300007B12; clone MNCb-2755 (RGD1309892), mRNA [NM_001013871]                                             | NM_001013871 |
| <b>-1.22</b> | 2.33 | Decrease | -3.75 | 0.00132285 | 0.1165 | BE117514                                          | BE117514 UI-R-BS1-ayo-f-11-0-UI.s1 UI-R-BS1 Rattus norvegicus cDNA clone UI-R-BS1-ayo-f-11-0-UI 3', mRNA sequence [BE117514]                      | BE117514     |
| <b>1.22</b>  | 2.33 | Increase | 3.74  | 0.00135517 | 0.1179 | serologically defined colon cancer antigen 3      | Rattus norvegicus serologically defined colon cancer antigen 3 (Sdccag3), mRNA [NM_001013135]                                                     | NM_001013135 |
| <b>1.22</b>  | 2.33 | Increase | 3.73  | 0.00138391 | 0.1191 | Poldip3_predicted                                 | PREDICTED: Rattus norvegicus polymerase (DNA-directed), delta interacting protein 3 (predicted) (Poldip3_predicted), mRNA [XM_001077668]          | XM_001077668 |

|              |      |                 |       |            |        |                                                          |                                                                                                                              |              |
|--------------|------|-----------------|-------|------------|--------|----------------------------------------------------------|------------------------------------------------------------------------------------------------------------------------------|--------------|
| <b>1.34</b>  | 2.54 | <b>Increase</b> | 3.72  | 0.00139849 | 0.1191 | procollagen, type I, alpha 2                             | Rattus norvegicus procollagen, type I, alpha 2 (Col1a2), mRNA [NM_053356]                                                    | NM_053356    |
| <b>-1.04</b> | 2.06 | <b>Decrease</b> | -3.70 | 0.00145321 | 0.1213 | ankyrin 3, epithelial                                    | Rattus norvegicus ankyrin 3, epithelial (Ank3), transcript variant 1, mRNA [NM_031805]                                       | NM_031805    |
| <b>1.31</b>  | 2.48 | <b>Increase</b> | 3.70  | 0.00146522 | 0.1216 | AI548160                                                 | AI548160 UI-R-C3-su-a-08-0-UI.s1 UI-R-C3 Rattus norvegicus cDNA clone UI-R-C3-su-a-08-0-UI 3', mRNA sequence [AI548160]      | AI548160     |
| <b>1.38</b>  | 2.60 | <b>Increase</b> | 3.70  | 0.00147101 | 0.1219 | similar to Antxr2 protein                                | PREDICTED: Rattus norvegicus similar to Antxr2 protein (LOC305633), mRNA [XM_223745]                                         | XM_223745    |
| <b>2.23</b>  | 4.69 | <b>Increase</b> | 3.69  | 0.00148803 | 0.1224 | BI294724                                                 | BI294724 UI-R-DK0-ceb-d-01-0-UI.s1 UI-R-DK0 Rattus norvegicus cDNA clone UI-R-DK0-ceb-d-01-0-UI 3', mRNA sequence [BI294724] | BI294724     |
| <b>-1.12</b> | 2.17 | <b>Decrease</b> | -3.69 | 0.0014957  | 0.1227 | similar to thyroid hormone receptor interactor 11        | PREDICTED: Rattus norvegicus similar to thyroid hormone receptor interactor 11 (LOC314393), mRNA [XM_001065684]              | XM_001065684 |
| <b>-2.44</b> | 5.44 | <b>Decrease</b> | -3.66 | 0.00162166 | 0.1269 | epoxide hydrolase 1, microsomal                          | Rattus norvegicus epoxide hydrolase 1, microsomal (Ephx1), transcript variant 2, mRNA [NM_012844]                            | NM_012844    |
| <b>2.01</b>  | 4.04 | <b>Increase</b> | 3.66  | 0.00162452 | 0.1269 | plakophilin 1 (predicted)                                | PREDICTED: Rattus norvegicus plakophilin 1 (predicted) (Pkp1_predicted), mRNA [XM_222666]                                    | XM_222666    |
| <b>1.46</b>  | 2.75 | <b>Increase</b> | 3.63  | 0.00172234 | 0.1301 | putative small membrane protein NID67                    | Rattus norvegicus putative small membrane protein NID67 (Nid67), mRNA [NM_173126]                                            | NM_173126    |
| <b>1.40</b>  | 2.65 | <b>Increase</b> | 3.62  | 0.00174717 | 0.1308 | actin related protein 2/3 complex, subunit 4 (predicted) | PREDICTED: Rattus norvegicus actin related protein 2/3 complex, subunit                                                      | XM_238365    |

|              |      |          |       |            |        |                                                        |                                                                                                                                                   |           |
|--------------|------|----------|-------|------------|--------|--------------------------------------------------------|---------------------------------------------------------------------------------------------------------------------------------------------------|-----------|
|              |      |          |       |            |        |                                                        | 4 (predicted) (Arpc4_predicted), mRNA [XM_238365]                                                                                                 |           |
| <b>-1.13</b> | 2.18 | Decrease | -3.62 | 0.00175214 | 0.1309 | short form of beta II spectrin                         | Rattus norvegicus beta II spectrin-short isoform mRNA, partial cds. [AF218849]                                                                    | AF218849  |
| <b>-1.42</b> | 2.67 | Decrease | -3.62 | 0.00176135 | 0.1309 | AW914836                                               | AW914836 EST346140 Normalized rat ovary, Bento Soares Rattus sp. cDNA clone RGIBH87 5' end, mRNA sequence [AW914836]                              | AW914836  |
| <b>-1.22</b> | 2.32 | Decrease | -3.62 | 0.00178164 | 0.1319 | AA926021                                               | AA926021 UI-R-A1-es-d-09-0-UI.s1 UI-R-A1 Rattus norvegicus cDNA clone UI-R-A1-es-d-09-0-UI 3' similar to gi [AA926021]                            | AA926021  |
| <b>1.26</b>  | 2.40 | Increase | 3.61  | 0.00179104 | 0.1319 | TC539961                                               | Q986H9 (Q986H9) ABC transporter binding protein, partial (5%) [TC539961]                                                                          |           |
| <b>-1.19</b> | 2.29 | Decrease | -3.61 | 0.00180987 | 0.1323 | DV727624                                               | RVL20147 Wackym-Soares normalized rat vestibular cDNA library Rattus norvegicus cDNA 5', mRNA sequence [DV727624]                                 | DV727624  |
| <b>-2.39</b> | 5.26 | Decrease | -3.59 | 0.00188425 | 0.1358 | TC522919                                               | Q6WZ94 (Q6WZ94) Transcriptional regulator, partial (6%) [TC522919]                                                                                |           |
| <b>-1.07</b> | 2.09 | Decrease | -3.59 | 0.00190887 | 0.1363 | CF107847                                               | Shultzomica01098 Rat lung airway and parenchyma cDNA libraries Rattus norvegicus cDNA clone NA8658 5', mRNA sequence [CF107847]                   | CF107847  |
| <b>-1.26</b> | 2.39 | Decrease | -3.59 | 0.00191382 | 0.1363 | AW918229                                               | AW918229 EST349533 Rat gene index, normalized rat, norvegicus, Bento Soares Rattus norvegicus cDNA clone RGIEO12 5' end, mRNA sequence [AW918229] | AW918229  |
| <b>-1.18</b> | 2.27 | Decrease | -3.56 | 0.0020184  | 0.1395 | similar to RNA polymerase III subunit RPC2 (predicted) | PREDICTED: Rattus norvegicus similar to RNA polymerase III subunit                                                                                | XM_343188 |

|              |      |          |       |            |        |                                                     |                                                                                                                                  |              |
|--------------|------|----------|-------|------------|--------|-----------------------------------------------------|----------------------------------------------------------------------------------------------------------------------------------|--------------|
|              |      |          |       |            |        |                                                     | RPC2 (predicted)<br>(RGD1565311_predicted), mRNA<br>[XM_343188]                                                                  |              |
| <b>-1.74</b> | 3.34 | Decrease | -3.56 | 0.00202929 | 0.1396 | F-box only protein 17                               | Rattus norvegicus F-box only protein 17 (Fbxo17), mRNA<br>[NM_001013064]                                                         | NM_001013064 |
| <b>2.74</b>  | 6.66 | Increase | 3.56  | 0.00203544 | 0.1398 | naked cuticle 1 homolog (Drosophila)<br>(predicted) | PREDICTED: Rattus norvegicus naked cuticle 1 homolog (Drosophila)<br>(predicted) (Nkd1_predicted), mRNA<br>[XM_344728]           | XM_344728    |
| <b>-1.76</b> | 3.38 | Decrease | -3.55 | 0.00206199 | 0.1401 | BF559590                                            | BF559590 UI-R-A1-dz-b-11-0-UI.r1<br>UI-R-A1 Rattus norvegicus cDNA<br>clone UI-R-A1-dz-b-11-0-UI 5', mRNA<br>sequence [BF559590] | BF559590     |
| <b>-2.02</b> | 4.06 | Decrease | -3.55 | 0.00206452 | 0.1401 | TC544106                                            | Q7PN93 (Q7PN93)<br>ENSANGP00000023986 (Fragment),<br>partial (17%) [TC544106]                                                    |              |
| <b>-2.52</b> | 5.73 | Decrease | -3.54 | 0.00210711 | 0.1410 | transformed mouse 3T3 cell double<br>minute 4       | Rattus norvegicus transformed<br>mouse 3T3 cell double minute 4<br>(Mdm4), mRNA [NM_001012026]                                   | NM_001012026 |
| <b>1.44</b>  | 2.72 | Increase | 3.53  | 0.00217264 | 0.1426 | AI180270                                            | AI180270 EST224013 Normalized rat<br>spleen, Bento Soares Rattus sp.<br>cDNA clone RSPCS66 3' end, mRNA<br>sequence [AI180270]   | AI180270     |
| <b>3.15</b>  | 8.86 | Increase | 3.52  | 0.00220238 | 0.1432 | XM_230900                                           | Rattus norvegicus similar to nuclear<br>DNA binding factor (LOC296420),<br>mRNA [XM_230900]                                      | XM_230900    |
| <b>-1.38</b> | 2.60 | Decrease | -3.52 | 0.00221443 | 0.1432 | kinesin family member 1B                            | Rattus norvegicus kinesin family<br>member 1B (Kif1b), mRNA<br>[NM_057200]                                                       | NM_057200    |
| <b>-1.46</b> | 2.75 | Decrease | -3.52 | 0.00221887 | 0.1432 | REX4, RNA exonuclease 4 homolog<br>(S. cerevisiae)  | Rattus norvegicus REX4, RNA<br>exonuclease 4 homolog (S.<br>cerevisiae) (Rexo4), mRNA<br>[NM_001033884]                          | NM_001033884 |

|       |      |          |       |            |        |                                                    |                                                                                                                                               |              |
|-------|------|----------|-------|------------|--------|----------------------------------------------------|-----------------------------------------------------------------------------------------------------------------------------------------------|--------------|
| -1.17 | 2.25 | Decrease | -3.52 | 0.00224096 | 0.1438 | AY623033                                           | Rattus norvegicus clone S33-A glycosyltransferase family 8-related mRNA, 3' UTR. [AY623033]                                                   | AY623033     |
| 1.50  | 2.84 | Increase | 3.50  | 0.00232474 | 0.1465 | LOC681211                                          | PREDICTED: Rattus norvegicus similar to monoacylglycerol O-acyltransferase 2 (LOC681211), mRNA [XM_001060766]                                 | XM_001060766 |
| -1.51 | 2.85 | Decrease | -3.50 | 0.0023524  | 0.1477 | TC530091                                           | Q7WGV9 (Q7WGV9) Sulfate transport system permease protein, partial (6%) [TC530091]                                                            |              |
| 1.36  | 2.56 | Increase | 3.49  | 0.00237681 | 0.1486 | similar to hypothetical gene supported by BC007071 | Rattus norvegicus similar to hypothetical gene supported by BC007071 (RGD1311868), mRNA [NM_001033061]                                        | NM_001033061 |
| 1.37  | 2.59 | Increase | 3.47  | 0.00249998 | 0.1498 | XM_222160                                          | Rattus norvegicus similar to endothelial monocyte-activating polypeptide (LOC288662), mRNA [XM_222160]                                        | XM_222160    |
| 1.16  | 2.23 | Increase | 3.47  | 0.00250552 | 0.1498 | RGD1562717_predicted                               | PREDICTED: Rattus norvegicus similar to ABI gene family, member 3 (NESH) binding protein (predicted) (RGD1562717_predicted), mRNA [XM_344015] | XM_344015    |
| -1.29 | 2.44 | Decrease | -3.46 | 0.0025342  | 0.1506 | pam, highwire, rpm 1 (predicted)                   | PREDICTED: Rattus norvegicus pam, highwire, rpm 1 (predicted) (Phr1_predicted), mRNA [XM_214245]                                              | XM_214245    |
| -1.01 | 2.01 | Decrease | -3.46 | 0.00257538 | 0.1518 | carbaryl phosphatase synthetase 2 (mapped)         | PREDICTED: Rattus norvegicus carbaryl phosphatase synthetase 2 (mapped) (Cad_mapped), mRNA [XM_343027]                                        | XM_343027    |
| -1.47 | 2.77 | Decrease | -3.45 | 0.00258624 | 0.1520 | zinc and ring finger 1 (predicted)                 | PREDICTED: Rattus norvegicus zinc and ring finger 1 (predicted)                                                                               | XM_342692    |

|              |       |                 |       |            |        |                                                                                                                |                                                                                                                                                              |              |
|--------------|-------|-----------------|-------|------------|--------|----------------------------------------------------------------------------------------------------------------|--------------------------------------------------------------------------------------------------------------------------------------------------------------|--------------|
|              |       |                 |       |            |        |                                                                                                                | (Znrf1_predicted), mRNA<br>[XM_342692]                                                                                                                       |              |
| <b>3.57</b>  | 11.85 | <b>Increase</b> | 3.45  | 0.00259159 | 0.1521 | a disintegrin-like and metalloproteinase (reprolysin type) with thrombospondin type 1 motif, 5 (aggrecanase-2) | Rattus norvegicus a disintegrin-like and metalloproteinase (reprolysin type) with thrombospondin type 1 motif, 5 (aggrecanase-2) (Adamts5), mRNA [NM_198761] | NM_198761    |
| <b>-2.34</b> | 5.08  | <b>Decrease</b> | -3.45 | 0.00261467 | 0.1528 | citron                                                                                                         | Rattus norvegicus postsynaptic density protein (citron) mRNA, complete cds. [AF039218]                                                                       | AF039218     |
| <b>1.62</b>  | 3.07  | <b>Increase</b> | 3.45  | 0.00262671 | 0.1528 | TC543377                                                                                                       | P97374 (P97374) Serum amyloid A protein isoform 1, partial (51%) [TC543377]                                                                                  |              |
| <b>1.09</b>  | 2.13  | <b>Increase</b> | 3.44  | 0.00269206 | 0.1544 | D-serine modulator-1                                                                                           | Rattus norvegicus D-serine modulator-1 (Dsm-1), mRNA [NM_001037215]                                                                                          | NM_001037215 |
| <b>1.88</b>  | 3.68  | <b>Increase</b> | 3.43  | 0.00271635 | 0.1549 | guanylate cyclase 2g                                                                                           | Rattus norvegicus ksGC mRNA, complete cds. [U33847]                                                                                                          | U33847       |
| <b>-1.35</b> | 2.55  | <b>Decrease</b> | -3.43 | 0.00272039 | 0.1549 | non imprinted in Prader-Willi/Angelman syndrome 2 homolog (human) (predicted)                                  | PREDICTED: Rattus norvegicus non imprinted in Prader-Willi/Angelman syndrome 2 homolog (human) (predicted) (Nipa2_predicted), mRNA [XM_218718]               | XM_218718    |
| <b>-1.39</b> | 2.62  | <b>Decrease</b> | -3.43 | 0.00276211 | 0.1549 | DV727231                                                                                                       | RVL19689 Wackym-Soares normalized rat vestibular cDNA library Rattus norvegicus cDNA 5', mRNA sequence [DV727231]                                            | DV727231     |
| <b>1.07</b>  | 2.09  | <b>Increase</b> | 3.42  | 0.00276402 | 0.1549 | XM_230113                                                                                                      | Rattus norvegicus similar to olfactory receptor GA_x6K02T2Q125-48226321-48225386 (LOC295766), mRNA [XM_230113]                                               | XM_230113    |
| <b>1.03</b>  | 2.05  | <b>Increase</b> | 3.42  | 0.00276469 | 0.1549 | hypothetical protein LOC687595                                                                                 | PREDICTED: Rattus norvegicus hypothetical protein LOC687594,                                                                                                 | XM_001078994 |

|              |      |                 |       |            |        |                                                          |                                                                                                                                       |              |
|--------------|------|-----------------|-------|------------|--------|----------------------------------------------------------|---------------------------------------------------------------------------------------------------------------------------------------|--------------|
|              |      |                 |       |            |        |                                                          | transcript variant 3 (LOC687595), mRNA [XM_001078994]                                                                                 |              |
| <b>1.25</b>  | 2.38 | <b>Increase</b> | 3.42  | 0.00278419 | 0.1552 | capping protein (actin filament), gelsolin-like          | Rattus norvegicus capping protein (actin filament), gelsolin-like (Capg), mRNA [NM_001013086]                                         | NM_001013086 |
| <b>1.07</b>  | 2.09 | <b>Increase</b> | 3.42  | 0.00279197 | 0.1552 | RAB13, member RAS oncogene family                        | Rattus norvegicus RAB13, member RAS oncogene family (Rab13), mRNA [NM_031092]                                                         | NM_031092    |
| <b>-1.57</b> | 2.97 | <b>Decrease</b> | -3.42 | 0.00279685 | 0.1552 | similar to KIAA1582 protein (predicted)                  | AA956352 UI-R-E1-fj-d-03-0-UI.s1 UI-R-E1 Rattus norvegicus cDNA clone UI-R-E1-fj-d-03-0-UI 3' similar to gi [AA956352]                | AA956352     |
| <b>1.97</b>  | 3.91 | <b>Increase</b> | 3.42  | 0.0028009  | 0.1552 | oligodendrocyte transcription factor 3 (predicted)       | Rattus norvegicus similar to Olig3 bHLH protein (LOC293012), mRNA [XM_218772]                                                         | XM_218772    |
| <b>-1.96</b> | 3.90 | <b>Decrease</b> | -3.41 | 0.00286925 | 0.1573 | gap junction membrane channel protein alpha 5            | Rattus norvegicus gap junction membrane channel protein alpha 5 (Gja5), mRNA [NM_019280]                                              | NM_019280    |
| <b>1.43</b>  | 2.69 | <b>Increase</b> | 3.40  | 0.00289194 | 0.1583 | AW507178                                                 | AW507178 EST00605 Plasmid Subtractive Library of Rat Cerebrum (stroke) Rattus norvegicus cDNA clone 1stB1, mRNA sequence [AW507178]   | AW507178     |
| <b>2.42</b>  | 5.35 | <b>Increase</b> | 3.40  | 0.00290391 | 0.1586 | mitochondrial ribosomal protein S10                      | Rattus norvegicus mitochondrial ribosomal protein S10 (Mrps10), mRNA [NM_001008859]                                                   | NM_001008859 |
| <b>-1.79</b> | 3.46 | <b>Decrease</b> | -3.40 | 0.00291347 | 0.1589 | Mediterranean fever                                      | Rattus norvegicus Mediterranean fever (Mefv), mRNA [NM_031634]                                                                        | NM_031634    |
| <b>1.43</b>  | 2.69 | <b>Increase</b> | 3.40  | 0.00291694 | 0.1589 | G-protein signalling modulator 1 (AGS3-like, C. elegans) | Rattus norvegicus G-protein signalling modulator 1 (AGS3-like, C. elegans), mRNA (cDNA clone IMAGE:7104788), complete cds. [BC086535] | BC086535     |



|       |      |          |       |            |        |                                                          |                                                                                                                                                                   |              |
|-------|------|----------|-------|------------|--------|----------------------------------------------------------|-------------------------------------------------------------------------------------------------------------------------------------------------------------------|--------------|
| 1.59  | 3.00 | Increase | 3.39  | 0.00299458 | 0.1599 | olfactory receptor 1294 (predicted)                      | Rattus norvegicus olfactory receptor 1294 (predicted) (Olr1294_predicted), mRNA [NM_001000597]                                                                    | NM_001000597 |
| -2.14 | 4.40 | Decrease | -3.39 | 0.00299963 | 0.1600 | zinc finger protein 365                                  | Rattus norvegicus zinc finger protein 365 (Zfp365), mRNA [NM_001025145]                                                                                           | NM_001025145 |
| -1.96 | 3.89 | Decrease | -3.39 | 0.0030178  | 0.1603 | transferrin receptor                                     | PREDICTED: Rattus norvegicus transferrin receptor (Tfrc), mRNA [XM_001072774]                                                                                     | XM_001072774 |
| 1.42  | 2.68 | Increase | 3.38  | 0.00303493 | 0.1606 | G protein pathway suppressor 2 (predicted)               | PREDICTED: Rattus norvegicus G protein pathway suppressor 2 (predicted) (Gps2_predicted), mRNA [XM_220615]                                                        | XM_220615    |
| -1.46 | 2.75 | Decrease | -3.38 | 0.00306101 | 0.1610 | similar to hypothetical protein (predicted)              | PREDICTED: Rattus norvegicus similar to hypothetical protein (predicted) (RGD1305269_predicted), mRNA [XM_223397]                                                 | XM_223397    |
| -2.40 | 5.30 | Decrease | -3.37 | 0.00309934 | 0.1611 | ryanodine receptor 1, skeletal muscle                    | PREDICTED: Rattus norvegicus similar to ryanodine receptor 1 (skeletal) (LOC686059), mRNA [XM_574411]                                                             | XM_574411    |
| 1.12  | 2.18 | Increase | 3.37  | 0.00310347 | 0.1611 | insulin-like growth factor binding protein 5             | Rattus norvegicus cDNA clone IMAGE:7110383 [BC087030]                                                                                                             | BC087030     |
| 1.27  | 2.41 | Increase | 3.37  | 0.00314157 | 0.1621 | BM986267                                                 | BM986267 EST531721 Rat gene index, normalized rat, norvegicus Rattus norvegicus cDNA clone RGIAD36 3' end similar to CaM kinase IV beta, mRNA sequence [BM986267] | BM986267     |
| -1.31 | 2.48 | Decrease | -3.37 | 0.00315777 | 0.1621 | ubiquitin specific peptidase 9, X chromosome (predicted) | PREDICTED: Rattus norvegicus ubiquitin specific peptidase 9, X chromosome (predicted)                                                                             | XM_343766    |

|              |      |                 |       |            |        |                                                                          |                                                                                                                                        |              |
|--------------|------|-----------------|-------|------------|--------|--------------------------------------------------------------------------|----------------------------------------------------------------------------------------------------------------------------------------|--------------|
|              |      |                 |       |            |        |                                                                          | (Usp9x_predicted), mRNA [XM_343766]                                                                                                    |              |
| <b>1.80</b>  | 3.48 | <b>Increase</b> | 3.37  | 0.00316515 | 0.1621 | similar to glyceraldehyde-3-phosphate dehydrogenase (predicted)          | PREDICTED: Rattus norvegicus similar to glyceraldehyde-3-phosphate dehydrogenase (predicted) (RGD1565190_predicted), mRNA [XM_344998]  | XM_344998    |
| <b>-2.20</b> | 4.58 | <b>Decrease</b> | -3.36 | 0.00317576 | 0.1621 | DY471722                                                                 | RVL22932 Wackym-Soares normalized rat vestibular cDNA library Rattus norvegicus cDNA 5', mRNA sequence [DY471722]                      | DY471722     |
| <b>-1.14</b> | 2.20 | <b>Decrease</b> | -3.36 | 0.00322584 | 0.1627 | hypothetical protein LOC304743                                           | Rattus norvegicus hypothetical protein LOC304743 (LOC304743), mRNA [NM_001024997]                                                      | NM_001024997 |
| <b>1.50</b>  | 2.82 | <b>Increase</b> | 3.36  | 0.00324062 | 0.1631 | lysyl oxidase-like 2 (predicted)                                         | PREDICTED: Rattus norvegicus lysyl oxidase-like 2 (predicted) (Loxl2_predicted), mRNA [XM_214225]                                      | XM_214225    |
| <b>-1.33</b> | 2.52 | <b>Decrease</b> | -3.35 | 0.00330146 | 0.1645 | S-adenosylhomocysteine hydrolase-like 1 (predicted)                      | PREDICTED: Rattus norvegicus S-adenosylhomocysteine hydrolase-like 1 (predicted) (Ahcyl1_predicted), mRNA [XM_001068488]               | XM_001068488 |
| <b>1.08</b>  | 2.11 | <b>Increase</b> | 3.34  | 0.00332289 | 0.1649 | similar to Chromobox protein homolog 4 (Polycomb 2 homolog) (Pc2) (MPc2) | PREDICTED: Rattus norvegicus similar to Chromobox protein homolog 4 (Polycomb 2 homolog) (Pc2) (MPc2) (LOC501403), mRNA [XM_001081757] | XM_001081757 |
| <b>-1.50</b> | 2.83 | <b>Decrease</b> | -3.34 | 0.00334268 | 0.1649 | similar to neurobeachin (predicted)                                      | PREDICTED: Rattus norvegicus similar to neurobeachin (predicted) (RGD1562629_predicted), mRNA [XM_001059612]                           | XM_001059612 |
| <b>1.62</b>  | 3.08 | <b>Increase</b> | 3.34  | 0.00334331 | 0.1649 | peripherin 1                                                             | Rattus norvegicus peripherin 1 (Prph1), mRNA [NM_012633]                                                                               | NM_012633    |

|              |       |          |       |            |        |                                                      |                                                                                                                         |              |
|--------------|-------|----------|-------|------------|--------|------------------------------------------------------|-------------------------------------------------------------------------------------------------------------------------|--------------|
| <b>-5.24</b> | 37.82 | Decrease | -3.34 | 0.00336991 | 0.1657 | AA956504                                             | AA956504 UI-R-E1-fk-g-05-0-UI.s1 UI-R-E1 Rattus norvegicus cDNA clone UI-R-E1-fk-g-05-0-UI 3' similar to gi [AA956504]  | AA956504     |
| <b>-1.39</b> | 2.62  | Decrease | -3.34 | 0.00338578 | 0.1657 | DEAH (Asp-Glu-Ala-His) box polypeptide 9 (predicted) | PREDICTED: Rattus norvegicus DEAH (Asp-Glu-Ala-His) box polypeptide 9 (predicted) (Dhx9_predicted), mRNA [XM_239780]    | XM_239780    |
| <b>-1.08</b> | 2.11  | Decrease | -3.33 | 0.00339987 | 0.1657 | BC089934                                             | Rattus norvegicus cDNA clone IMAGE:7309127 [BC089934]                                                                   | BC089934     |
| <b>-1.02</b> | 2.03  | Decrease | -3.33 | 0.00342911 | 0.1659 | HtrA serine peptidase 4 (predicted)                  | Rattus norvegicus similar to Probable serine protease HTRA4 precursor (LOC306564), mRNA [XM_224963]                     | XM_224963    |
| <b>1.06</b>  | 2.08  | Increase | 3.33  | 0.00345874 | 0.1663 | 3-alpha-hydroxysteroid dehydrogenase                 | Rattus norvegicus 3-alpha-hydroxysteroid dehydrogenase (LOC191574), mRNA [NM_138547]                                    | NM_138547    |
| <b>1.22</b>  | 2.32  | Increase | 3.32  | 0.00348943 | 0.1667 | RGD1564450 (predicted)                               | PREDICTED: Rattus norvegicus RGD1564450 (predicted) (RGD1564450_predicted), mRNA [XM_215355]                            | XM_215355    |
| <b>-1.01</b> | 2.02  | Decrease | -3.32 | 0.00354795 | 0.1679 | TC521816                                             | D87060 cerebral protein-1 {Homo sapiens;}, partial (17%) [TC521816]                                                     |              |
| <b>1.21</b>  | 2.31  | Increase | 3.30  | 0.00365531 | 0.1703 | BF555594                                             | BF555594 UI-R-E0-cz-b-01-0-UI.r1 UI-R-E0 Rattus norvegicus cDNA clone UI-R-E0-cz-b-01-0-UI 5', mRNA sequence [BF555594] | BF555594     |
| <b>1.04</b>  | 2.06  | Increase | 3.30  | 0.00366227 | 0.1703 | similar to Hypothetical protein MGC59076             | Rattus norvegicus similar to Hypothetical protein MGC59076 (RGD1309144), mRNA [NM_001009658]                            | NM_001009658 |
| <b>2.19</b>  | 4.57  | Increase | 3.30  | 0.00369731 | 0.1711 | mitochondrial ribosomal protein L52 (predicted)      | PREDICTED: Rattus norvegicus mitochondrial ribosomal protein L52 (predicted), transcript variant 2                      | XM_341312    |

|              |       |          |       |            |        |                                                               |                                                                                                                            |              |
|--------------|-------|----------|-------|------------|--------|---------------------------------------------------------------|----------------------------------------------------------------------------------------------------------------------------|--------------|
|              |       |          |       |            |        |                                                               | (Mrpl52_predicted), mRNA [XM_341312]                                                                                       |              |
| <b>-1.39</b> | 2.62  | Decrease | -3.30 | 0.00370888 | 0.1713 | potassium inwardly-rectifying channel, subfamily J, member 13 | Rattus norvegicus potassium inwardly-rectifying channel, subfamily J, member 13 (Kcnj13), mRNA [NM_053608]                 | NM_053608    |
| <b>-5.55</b> | 46.95 | Decrease | -3.29 | 0.00371585 | 0.1713 | tachykinin 4                                                  | Rattus norvegicus tachykinin 4 (Tac4), mRNA [NM_172328]                                                                    | NM_172328    |
| <b>-3.70</b> | 13.02 | Decrease | -3.29 | 0.0037495  | 0.1716 | discs, large (Drosophila) homolog-associated protein 3        | Rattus norvegicus discs, large (Drosophila) homolog-associated protein 3 (Dlgap3), mRNA [NM_173138]                        | NM_173138    |
| <b>1.13</b>  | 2.19  | Increase | 3.29  | 0.00379421 | 0.1725 | AI599392                                                      | AI599392 EST251095 Normalized rat embryo, Bento Soares Rattus sp. cDNA clone REMEO50 3' end, mRNA sequence [AI599392]      | AI599392     |
| <b>1.02</b>  | 2.03  | Increase | 3.29  | 0.00379446 | 0.1725 | endothelial cell adhesion molecule                            | Rattus norvegicus endothelial cell adhesion molecule (Esam), mRNA [NM_001004245]                                           | NM_001004245 |
| <b>1.16</b>  | 2.23  | Increase | 3.27  | 0.00390879 | 0.1737 | procollagen, type 1, alpha 1                                  | Rat alpha-1 type I collagen mRNA, segment 3. [M12199]                                                                      | M12199       |
| <b>-1.62</b> | 3.07  | Decrease | -3.27 | 0.0039246  | 0.1737 | Syncrip                                                       | PREDICTED: Rattus norvegicus synaptotagmin binding, cytoplasmic RNA interacting protein (Syncrip), mRNA [XM_001065902]     | XM_001065902 |
| <b>1.03</b>  | 2.04  | Increase | 3.26  | 0.00404379 | 0.1759 | hypothetical protein LOC690113                                | PREDICTED: Rattus norvegicus similar to hypothetical protein FLJ14800 (predicted) (RGD1561500_predicted), mRNA [XM_235711] | XM_235711    |
| <b>-1.64</b> | 3.12  | Decrease | -3.26 | 0.00404615 | 0.1759 | hypothetical LOC288978                                        | PREDICTED: Rattus norvegicus hypothetical LOC288978 (LOC288978), mRNA [XM_213864]                                          | XM_213864    |

|              |      |                 |       |            |        |                                                                                     |                                                                                                                                                                                     |              |
|--------------|------|-----------------|-------|------------|--------|-------------------------------------------------------------------------------------|-------------------------------------------------------------------------------------------------------------------------------------------------------------------------------------|--------------|
| <b>1.02</b>  | 2.02 | <b>Increase</b> | 3.26  | 0.00406073 | 0.1759 | CTD (carboxy-terminal domain, RNA polymerase II, polypeptide A) small phosphatase 1 | PREDICTED: Rattus norvegicus CTD (carboxy-terminal domain, RNA polymerase II, polypeptide A) small phosphatase 1 (Ctdsp1), mRNA [XM_343588]                                         | XM_343588    |
| <b>-1.88</b> | 3.68 | <b>Decrease</b> | -3.25 | 0.00409773 | 0.1765 | BM986233                                                                            | BM986233 EST531687 Rat gene index, normalized rat, norvegicus Rattus norvegicus cDNA clone RGIAB50 3' end similar to 57-KDa calcium-binding protein MCaBP, mRNA sequence [BM986233] | BM986233     |
| <b>-2.02</b> | 4.07 | <b>Decrease</b> | -3.25 | 0.00410651 | 0.1765 | Ttn                                                                                 | PREDICTED: Rattus norvegicus titin (Ttn), mRNA [XM_001065955]                                                                                                                       | XM_001065955 |
| <b>1.95</b>  | 3.86 | <b>Increase</b> | 3.25  | 0.00415592 | 0.1771 | ChaC, cation transport regulator-like 1 (E. coli) (predicted)                       | PREDICTED: Rattus norvegicus ChaC, cation transport regulator-like 1 (E. coli) (predicted) (Chac1_predicted), mRNA [XM_342497]                                                      | XM_342497    |
| <b>-1.07</b> | 2.10 | <b>Decrease</b> | -3.24 | 0.00418276 | 0.1778 | similar to RIKEN cDNA E230015L20 gene (predicted)                                   | PREDICTED: Rattus norvegicus similar to RIKEN cDNA E230015L20 gene (predicted) (RGD1560873_predicted), mRNA [XM_001058121]                                                          | XM_001058121 |
| <b>1.58</b>  | 2.99 | <b>Increase</b> | 3.24  | 0.00418398 | 0.1778 | olfactory receptor 384 (predicted)                                                  | Rattus norvegicus olfactory receptor 384 (predicted) (Olr384_predicted), mRNA [NM_001000263]                                                                                        | NM_001000263 |
| <b>1.42</b>  | 2.68 | <b>Increase</b> | 3.24  | 0.00424019 | 0.1789 | cytochrome b-245, alpha polypeptide                                                 | Rattus norvegicus cytochrome b-245, alpha polypeptide (Cyba), mRNA [NM_024160]                                                                                                      | NM_024160    |
| <b>-1.68</b> | 3.20 | <b>Decrease</b> | -3.22 | 0.00439272 | 0.1823 | oxidative-stress responsive 1 (predicted)                                           | PREDICTED: Rattus norvegicus oxidative-stress responsive 1 (predicted) (Oxsr1_predicted), mRNA [XM_001078098]                                                                       | XM_001078098 |
| <b>-1.13</b> | 2.19 | <b>Decrease</b> | -3.22 | 0.00440058 | 0.1823 | tenascin R                                                                          | Rattus norvegicus tenascin R (Tnr), mRNA [NM_013045]                                                                                                                                | NM_013045    |

|              |       |          |       |            |        |                                                               |                                                                                                                                                             |              |
|--------------|-------|----------|-------|------------|--------|---------------------------------------------------------------|-------------------------------------------------------------------------------------------------------------------------------------------------------------|--------------|
| <b>-1.15</b> | 2.22  | Decrease | -3.22 | 0.00445323 | 0.1823 | AW141160                                                      | AW141160 EST291196 Normalized rat brain, Bento Soares Rattus sp. cDNA clone RGIBE24 5' end similar to Ki-ras cellular oncogene 4B, mRNA sequence [AW141160] | AW141160     |
| <b>-1.11</b> | 2.16  | Decrease | -3.22 | 0.00445436 | 0.1823 | similar to RIKEN cDNA 3110052N05                              | Rattus norvegicus similar to RIKEN cDNA 3110052N05 (RGD1308579), mRNA [NM_001014151]                                                                        | NM_001014151 |
| <b>-2.63</b> | 6.18  | Decrease | -3.21 | 0.00455128 | 0.1837 | dystrophin, muscular dystrophy                                | Rattus norvegicus dystrophin, muscular dystrophy (Dmd), transcript variant Dp71ab, mRNA [NM_001005244]                                                      | NM_001005244 |
| <b>1.53</b>  | 2.89  | Increase | 3.20  | 0.00456528 | 0.1837 | BI282748                                                      | BI282748 UI-R-CW0s-cce-g-02-0-UI.s1 UI-R-CW0s Rattus norvegicus cDNA clone UI-R-CW0s-cce-g-02-0-UI 3', mRNA sequence [BI282748]                             | BI282748     |
| <b>1.80</b>  | 3.47  | Increase | 3.20  | 0.00457862 | 0.1839 | signal sequence receptor, gamma                               | Rattus norvegicus signal sequence receptor, gamma (Ssr3), mRNA [NM_031120]                                                                                  | NM_031120    |
| <b>-4.62</b> | 24.52 | Decrease | -3.20 | 0.00460328 | 0.1844 | similar to apolipoprotein L2; apolipoprotein L-II (predicted) | PREDICTED: Rattus norvegicus similar to apolipoprotein L2; apolipoprotein L-II (predicted) (RGD1309808_predicted), mRNA [XM_343282]                         | XM_343282    |
| <b>-1.07</b> | 2.10  | Decrease | -3.20 | 0.00460798 | 0.1844 | similar to KIAA0614 protein (predicted)                       | PREDICTED: Rattus norvegicus similar to KIAA0614 protein (predicted) (RGD1309762_predicted), mRNA [XM_222205]                                               | XM_222205    |
| <b>-1.50</b> | 2.82  | Decrease | -3.20 | 0.00464147 | 0.1853 | cyclin G1                                                     | Rattus norvegicus cyclin G1 (Ccng1), mRNA [NM_012923]                                                                                                       | NM_012923    |
| <b>-1.04</b> | 2.05  | Decrease | -3.19 | 0.00466874 | 0.1853 | Arid2_predicted                                               | PREDICTED: Rattus norvegicus AT rich interactive domain 2 (Arid-rfx                                                                                         | XM_001059099 |

|              |      |                 |       |            |        |                                                             |                                                                                                                              |              |
|--------------|------|-----------------|-------|------------|--------|-------------------------------------------------------------|------------------------------------------------------------------------------------------------------------------------------|--------------|
|              |      |                 |       |            |        |                                                             | like) (predicted) (Arid2_predicted), mRNA [XM_001059099]                                                                     |              |
| <b>1.77</b>  | 3.42 | <b>Increase</b> | 3.19  | 0.00470476 | 0.1855 | similar to Protein C10orf11 homolog                         | PREDICTED: Rattus norvegicus similar to Protein C10orf11 homolog (LOC681383), mRNA [XM_001059639]                            | XM_001059639 |
| <b>3.31</b>  | 9.95 | <b>Increase</b> | 3.19  | 0.00471651 | 0.1857 | AA924846                                                    | AA924846 UI-R-A1-eb-a-03-0-UI.s1 UI-R-A1 Rattus norvegicus cDNA clone UI-R-A1-eb-a-03-0-UI 3' similar to gi [AA924846]       | AA924846     |
| <b>-1.87</b> | 3.66 | <b>Decrease</b> | -3.19 | 0.00476375 | 0.1873 | ribonuclease, RNase A family, 10 (non-active) (predicted)   | Rattus norvegicus ribonuclease, RNase A family, 10 (non-active) (predicted) (Rnase10_predicted), mRNA [NM_001012467]         | NM_001012467 |
| <b>1.14</b>  | 2.20 | <b>Increase</b> | 3.18  | 0.00480234 | 0.1885 | BE108178                                                    | BE108178 UI-R-BS1-ayw-g-07-0-UI.s1 UI-R-BS1 Rattus norvegicus cDNA clone UI-R-BS1-ayw-g-07-0-UI 3', mRNA sequence [BE108178] | BE108178     |
| <b>1.03</b>  | 2.04 | <b>Increase</b> | 3.16  | 0.00501616 | 0.1900 | similar to 60S ribosomal protein L29 (P23) (predicted)      | PREDICTED: Rattus norvegicus similar to 60S ribosomal protein L29 (P23) (predicted) (RGD1562489_predicted), mRNA [XM_220370] | XM_220370    |
| <b>1.06</b>  | 2.09 | <b>Increase</b> | 3.15  | 0.00511205 | 0.1909 | similar to RIKEN cDNA 2610003J06                            | Rattus norvegicus similar to RIKEN cDNA 2610003J06 (RGD1307381), mRNA [NM_001014116]                                         | NM_001014116 |
| <b>1.54</b>  | 2.91 | <b>Increase</b> | 3.15  | 0.00517716 | 0.1914 | myosin, light polypeptide 2                                 | AGENCOURT_28626027 NIH_MGC_250 Rattus norvegicus cDNA clone IMAGE:7384149 5', mRNA sequence [CO563307]                       | CO563307     |
| <b>1.16</b>  | 2.23 | <b>Increase</b> | 3.14  | 0.00528347 | 0.1933 | similar to Heparan-sulfate 6-O-sulfotransferase 2 (HS6ST-2) | PREDICTED: Rattus norvegicus similar to heparan sulfate 6-O-sulfotransferase 2 isoform S (predicted)                         | XM_228681    |

|              |       |                 |       |            |        |                                                                                         |                                                                                                                                                          |              |
|--------------|-------|-----------------|-------|------------|--------|-----------------------------------------------------------------------------------------|----------------------------------------------------------------------------------------------------------------------------------------------------------|--------------|
|              |       |                 |       |            |        |                                                                                         | (RGD1564397_predicted), mRNA [XM_228681]                                                                                                                 |              |
| <b>-3.80</b> | 13.90 | <b>Decrease</b> | -3.14 | 0.00528409 | 0.1933 | cell death-inducing DNA fragmentation factor, alpha subunit-like effector A (predicted) | PREDICTED: Rattus norvegicus cell death-inducing DNA fragmentation factor, alpha subunit-like effector A (predicted) (Cidea_predicted), mRNA [XM_214551] | XM_214551    |
| <b>1.12</b>  | 2.17  | <b>Increase</b> | 3.14  | 0.00530708 | 0.1937 | transmembrane protein 53 (predicted)                                                    | PREDICTED: Rattus norvegicus transmembrane protein 53 (predicted) (Tmem53_predicted), mRNA [XM_233431]                                                   | XM_233431    |
| <b>1.35</b>  | 2.55  | <b>Increase</b> | 3.13  | 0.00544723 | 0.1960 | similar to scaffolding protein SLIPR (predicted)                                        | Rattus norvegicus similar to scaffolding protein SLIPR (predicted) (RGD1306155_predicted), mRNA [NM_001037218]                                           | NM_001037218 |
| <b>-1.18</b> | 2.27  | <b>Decrease</b> | -3.12 | 0.00554888 | 0.1970 | ENSRNOT00000051958                                                                      | Q9NQW1 (Q9NQW1) Secretory pathway component Sec31B-1, partial (10%) [TC548694]                                                                           |              |
| <b>-2.24</b> | 4.72  | <b>Decrease</b> | -3.11 | 0.00559753 | 0.1976 | titin                                                                                   | PREDICTED: Rattus norvegicus titin (Ttn), mRNA [XM_001065955]                                                                                            | XM_001065955 |
| <b>-1.24</b> | 2.36  | <b>Decrease</b> | -3.11 | 0.00567896 | 0.1982 | solute carrier family 30 (zinc transporter), member 4                                   | Rattus norvegicus solute carrier family 30 (zinc transporter), member 4 (Slc30a4), mRNA [NM_172066]                                                      | NM_172066    |
| <b>1.23</b>  | 2.35  | <b>Increase</b> | 3.10  | 0.00573878 | 0.1983 | olfactory receptor 283 (predicted)                                                      | Rattus norvegicus olfactory receptor 283 (predicted) (Olr283_predicted), mRNA [NM_001001010]                                                             | NM_001001010 |
| <b>-1.34</b> | 2.54  | <b>Decrease</b> | -3.10 | 0.00581127 | 0.1989 | lipin 1                                                                                 | Rattus norvegicus lipin 1 (Lpin1), mRNA [NM_001012111]                                                                                                   | NM_001012111 |
| <b>1.33</b>  | 2.52  | <b>Increase</b> | 3.09  | 0.00587023 | 0.1998 | follistatin                                                                             | Rattus norvegicus follistatin (Fst), mRNA [NM_012561]                                                                                                    | NM_012561    |
| <b>1.48</b>  | 2.78  | <b>Increase</b> | 3.08  | 0.00602683 | 0.2011 | spastic paraplegia 21 homolog (human)                                                   | Rattus norvegicus spastic paraplegia 21 homolog (human) (Spg21), mRNA [NM_001006987]                                                                     | NM_001006987 |



|              |      |                 |       |            |        |                                                                 |                                                                                                                                       |              |
|--------------|------|-----------------|-------|------------|--------|-----------------------------------------------------------------|---------------------------------------------------------------------------------------------------------------------------------------|--------------|
| <b>1.49</b>  | 2.81 | <b>Increase</b> | 3.08  | 0.0060366  | 0.2012 | carbohydrate sulfotransferase 12                                | Rattus norvegicus carbohydrate sulfotransferase 12 (Chst12), mRNA [NM_001037775]                                                      | NM_001037775 |
| <b>-1.48</b> | 2.79 | <b>Decrease</b> | -3.08 | 0.00604993 | 0.2012 | HCR (a-helix coiled-coil rod homolog)                           | Rattus norvegicus HCR (a-helix coiled-coil rod homolog) (Hcr), mRNA [NM_001002822]                                                    | NM_001002822 |
| <b>-1.51</b> | 2.85 | <b>Decrease</b> | -3.08 | 0.00605562 | 0.2012 | similar to Dynamin-binding protein (Scaffold protein Tuba)      | PREDICTED: Rattus norvegicus similar to Dynamin-binding protein (Scaffold protein Tuba) (LOC309362), mRNA [XM_219860]                 | XM_219860    |
| <b>2.37</b>  | 5.16 | <b>Increase</b> | 3.08  | 0.00606736 | 0.2012 | similar to RIKEN cDNA 633040615 (predicted)                     | PREDICTED: Rattus norvegicus similar to RIKEN cDNA 633040615 (predicted) (RGD1307396_predicted), mRNA [XM_341029]                     | XM_341029    |
| <b>-1.09</b> | 2.13 | <b>Decrease</b> | -3.08 | 0.00610332 | 0.2019 | similar to high mobility group protein homolog HMG4 (predicted) | PREDICTED: Rattus norvegicus similar to high mobility group protein homolog HMG4 (predicted) (RGD1564407_predicted), mRNA [XM_223440] | XM_223440    |
| <b>-2.14</b> | 4.41 | <b>Decrease</b> | -3.07 | 0.00613449 | 0.2024 | AA892994                                                        | AA892994 EST196797 Normalized rat kidney, Bento Soares Rattus sp. cDNA clone RKIBA84 3' end, mRNA sequence [AA892994]                 | AA892994     |
| <b>-1.07</b> | 2.10 | <b>Decrease</b> | -3.07 | 0.00621519 | 0.2030 | chromosome segregation 1-like (S. cerevisiae) (predicted)       | PREDICTED: Rattus norvegicus chromosome segregation 1-like (S. cerevisiae) (predicted) (Cse1l_predicted), mRNA [XM_342581]            | XM_342581    |
| <b>-1.40</b> | 2.64 | <b>Decrease</b> | -3.07 | 0.00621729 | 0.2030 | Ttn                                                             | PREDICTED: Rattus norvegicus titin (Ttn), mRNA [XM_001065955]                                                                         | XM_001065955 |
| <b>-2.17</b> | 4.49 | <b>Decrease</b> | -3.06 | 0.00630278 | 0.2045 | X52757                                                          | R.norvegicus mitochondrial D-loop region. [X52757]                                                                                    | X52757       |

|              |       |                 |       |            |        |                                             |                                                                                                                              |              |
|--------------|-------|-----------------|-------|------------|--------|---------------------------------------------|------------------------------------------------------------------------------------------------------------------------------|--------------|
| <b>1.38</b>  | 2.60  | <b>Increase</b> | 3.06  | 0.00637428 | 0.2050 | cofilin 1, non-muscle                       | Rattus norvegicus cofilin 1, non-muscle (Cfl1), mRNA [NM_017147]                                                             | NM_017147    |
| <b>-1.17</b> | 2.25  | <b>Decrease</b> | -3.05 | 0.00644075 | 0.2055 | programmed cell death 6 interacting protein | PREDICTED: Rattus norvegicus programmed cell death 6 interacting protein (Pcd6ip), mRNA [XM_001076624]                       | XM_001076624 |
| <b>1.75</b>  | 3.36  | <b>Increase</b> | 3.05  | 0.0065314  | 0.2070 | BF564217                                    | BF564217 UI-R-C4-alk-b-02-0-UI.r1 UI-R-C4 Rattus norvegicus cDNA clone UI-R-C4-alk-b-02-0-UI 5', mRNA sequence [BF564217]    | BF564217     |
| <b>2.11</b>  | 4.32  | <b>Increase</b> | 3.04  | 0.00662729 | 0.2085 | BM392202                                    | BM392202 UI-R-DO1-ckp-o-12-0-UI.s1 UI-R-DO1 Rattus norvegicus cDNA clone UI-R-DO1-ckp-o-12-0-UI 3', mRNA sequence [BM392202] | BM392202     |
| <b>1.09</b>  | 2.13  | <b>Increase</b> | 3.04  | 0.00664561 | 0.2087 | pituitary tumor-transforming 1              | Rattus norvegicus pituitary tumor-transforming 1 (Pttg1), mRNA [NM_022391]                                                   | NM_022391    |
| <b>1.98</b>  | 3.94  | <b>Increase</b> | 3.03  | 0.00669231 | 0.2094 | follistatin                                 | Rattus norvegicus follistatin (Fst), mRNA [NM_012561]                                                                        | NM_012561    |
| <b>1.78</b>  | 3.44  | <b>Increase</b> | 3.03  | 0.00674725 | 0.2101 | growth arrest specific 7                    | Rattus norvegicus growth arrest specific 7 (Gas7), mRNA [NM_053484]                                                          | NM_053484    |
| <b>-4.10</b> | 17.18 | <b>Decrease</b> | -3.03 | 0.00682525 | 0.2113 | similar to RIKEN cDNA C530028O21 gene       | Rattus norvegicus similar to RIKEN cDNA C530028O21 gene (RGD1304952), mRNA [NM_001014059]                                    | NM_001014059 |
| <b>1.09</b>  | 2.13  | <b>Increase</b> | 3.02  | 0.00691209 | 0.2120 | similar to KIAA0974 protein                 | Rattus norvegicus similar to KIAA0974 protein (RGD1359592), mRNA [NM_001013878]                                              | NM_001013878 |
| <b>2.83</b>  | 7.13  | <b>Increase</b> | 3.02  | 0.00696461 | 0.2121 | AA944569                                    | AA944569 EST200068 Normalized rat embryo, Bento Soares Rattus sp. cDNA clone REMAL22 3' end, mRNA sequence [AA944569]        | AA944569     |

|       |      |          |       |            |        |                                                          |                                                                                                                                                   |              |
|-------|------|----------|-------|------------|--------|----------------------------------------------------------|---------------------------------------------------------------------------------------------------------------------------------------------------|--------------|
| -2.12 | 4.33 | Decrease | -3.01 | 0.00703652 | 0.2134 | AI233993                                                 | AI233993 EST230681 Normalized rat lung, Bento Soares Rattus sp. cDNA clone RLUCT82 3' end, mRNA sequence [AI233993]                               | AI233993     |
| 1.04  | 2.05 | Increase | 3.01  | 0.00704273 | 0.2135 | bcl2-associated death promoter                           | Rattus norvegicus bcl2-associated death promoter (Bad), mRNA [NM_022698]                                                                          | NM_022698    |
| 1.52  | 2.87 | Increase | 3.00  | 0.00729822 | 0.2171 | AW917664                                                 | AW917664 EST348968 Rat gene index, normalized rat, norvegicus, Bento Soares Rattus norvegicus cDNA clone RGIEG58 5' end, mRNA sequence [AW917664] | AW917664     |
| -1.18 | 2.26 | Decrease | -2.99 | 0.00731168 | 0.2171 | ring finger protein 135                                  | Rattus norvegicus ring finger protein 135 (Rnf135), mRNA [NM_001012010]                                                                           | NM_001012010 |
| -1.22 | 2.33 | Decrease | -2.98 | 0.00746977 | 0.2188 | TC530939                                                 | Q9ERK2 (Q9ERK2) Neprilysin-like peptidase gamma, partial (4%) [TC530939]                                                                          |              |
| 1.19  | 2.28 | Increase | 2.97  | 0.00767044 | 0.2210 | XM_342889                                                | Rattus norvegicus similar to hypothetical protein (LOC362570), mRNA [XM_342889]                                                                   | XM_342889    |
| 1.13  | 2.18 | Increase | 2.96  | 0.00791288 | 0.2246 | reversion induced LIM gene                               | Rattus norvegicus reversion induced LIM gene (Ril), mRNA [NM_017062]                                                                              | NM_017062    |
| 1.25  | 2.38 | Increase | 2.96  | 0.00795908 | 0.2256 | nicotinamide N-methyltransferase (predicted)             | PREDICTED: Rattus norvegicus nicotinamide N-methyltransferase (predicted) (Nnmt_predicted), mRNA [XM_217138]                                      | XM_217138    |
| 1.00  | 2.00 | Increase | 2.95  | 0.00811882 | 0.2268 | Dnaj (Hsp40) homolog, subfamily C, member 17 (predicted) | PREDICTED: Rattus norvegicus Dnaj (Hsp40) homolog, subfamily C, member 17 (predicted) (Dnajc17_predicted), mRNA [XM_230468]                       | XM_230468    |
| 2.10  | 4.29 | Increase | 2.95  | 0.00812464 | 0.2268 | Senp5_predicted                                          | PREDICTED: Rattus norvegicus SUMO/sentrin specific protease 5                                                                                     | XM_221369    |

|              |      |                 |       |            |        |                                                                                                           |                                                                                                                                                                                 |              |
|--------------|------|-----------------|-------|------------|--------|-----------------------------------------------------------------------------------------------------------|---------------------------------------------------------------------------------------------------------------------------------------------------------------------------------|--------------|
|              |      |                 |       |            |        |                                                                                                           | (predicted) (Senp5_predicted), mRNA [XM_221369]                                                                                                                                 |              |
| <b>1.12</b>  | 2.18 | <b>Increase</b> | 2.94  | 0.00817349 | 0.2270 | AW523375                                                                                                  | AW523375 UI-R-BO0-aif-e-07-0-UI.s1 UI-R-BO0 Rattus norvegicus cDNA clone UI-R-BO0-aif-e-07-0-UI 3', mRNA sequence [AW523375]                                                    | AW523375     |
| <b>1.12</b>  | 2.17 | <b>Increase</b> | 2.94  | 0.0082098  | 0.2275 | DiGeorge syndrome critical region gene 14 homolog (human)                                                 | Rattus norvegicus DiGeorge syndrome critical region gene 14 homolog (human) (Dgcr14), mRNA [NM_001012472]                                                                       | NM_001012472 |
| <b>-1.01</b> | 2.02 | <b>Decrease</b> | -2.94 | 0.00827712 | 0.2284 | XM_225436                                                                                                 | Rattus norvegicus similar to hypothetical protein MGC39558 (LOC291212), mRNA [XM_225436]                                                                                        | XM_225436    |
| <b>-1.01</b> | 2.02 | <b>Decrease</b> | -2.94 | 0.00829809 | 0.2284 | similar to 5-aminoimidazole-4-carboxamide ribonucleotide formyltransferase/IMP cyclohydrolase (predicted) | PREDICTED: Rattus norvegicus similar to 5-aminoimidazole-4-carboxamide ribonucleotide formyltransferase/IMP cyclohydrolase (predicted) (RGD1559750_predicted), mRNA [XM_227632] | XM_227632    |
| <b>1.35</b>  | 2.55 | <b>Increase</b> | 2.94  | 0.00831477 | 0.2284 | glutathione peroxidase 3                                                                                  | Rattus norvegicus glutathione peroxidase 3 (Gpx3), mRNA [NM_022525]                                                                                                             | NM_022525    |
| <b>1.31</b>  | 2.48 | <b>Increase</b> | 2.94  | 0.00833605 | 0.2284 | AI145976                                                                                                  | AI145976 UI-R-BT0-qc-g-05-0-UI.s1 UI-R-BT0 Rattus norvegicus cDNA clone UI-R-BT0-qc-g-05-0-UI 3', mRNA sequence [AI145976]                                                      | AI145976     |
| <b>1.25</b>  | 2.38 | <b>Increase</b> | 2.93  | 0.00837806 | 0.2291 | similar to RIKEN cDNA 1500015010 (predicted)                                                              | PREDICTED: Rattus norvegicus similar to RIKEN cDNA 1500015010 (predicted) (RGD1305645_predicted), mRNA [XM_343562]                                                              | XM_343562    |
| <b>-1.66</b> | 3.16 | <b>Decrease</b> | -2.93 | 0.00842478 | 0.2297 | Ttn                                                                                                       | PREDICTED: Rattus norvegicus titin (Ttn), mRNA [XM_001065955]                                                                                                                   | XM_001065955 |

|              |      |          |       |            |        |                                                                                  |                                                                                                                                                                        |              |
|--------------|------|----------|-------|------------|--------|----------------------------------------------------------------------------------|------------------------------------------------------------------------------------------------------------------------------------------------------------------------|--------------|
| <b>-1.34</b> | 2.53 | Decrease | -2.92 | 0.00854064 | 0.2312 | splicing factor 3b, subunit 1                                                    | BF523561 UI-R-C0-jr-d-05-0-UI.r1 UI-R-C0 Rattus norvegicus cDNA clone UI-R-C0-jr-d-05-0-UI 5', mRNA sequence [BF523561]                                                | BF523561     |
| <b>-2.82</b> | 7.05 | Decrease | -2.92 | 0.00856814 | 0.2316 | U08214                                                                           | RSU08214 Rattus sp. DNA binding protein (URE-B1) mRNA, complete cds [U08214]                                                                                           | U08214       |
| <b>-1.15</b> | 2.22 | Decrease | -2.92 | 0.00861781 | 0.2321 | nebulin (predicted)                                                              | PREDICTED: Rattus norvegicus nebulin (predicted) (Neb_predicted), mRNA [XM_229925]                                                                                     | XM_229925    |
| <b>1.85</b>  | 3.60 | Increase | 2.92  | 0.00870115 | 0.2326 | similar to guanine nucleotide binding protein, alpha stimulating, olfactory type | PREDICTED: Rattus norvegicus similar to guanine nucleotide binding protein, alpha stimulating, olfactory type (LOC682950), mRNA [XM_001060921]                         | XM_001060921 |
| <b>1.71</b>  | 3.26 | Increase | 2.91  | 0.00874872 | 0.2331 | chymase 1, mast cell                                                             | Rattus norvegicus chymase 1, mast cell (Cma1), mRNA [NM_013092]                                                                                                        | NM_013092    |
| <b>1.08</b>  | 2.12 | Increase | 2.91  | 0.00880843 | 0.2343 | STARD3 N-terminal like                                                           | Rattus norvegicus STARD3 N-terminal like (Stard3nl), mRNA [NM_001008298]                                                                                               | NM_001008298 |
| <b>1.07</b>  | 2.10 | Increase | 2.91  | 0.00882726 | 0.2345 | nuclear transcription factor-Y gamma                                             | Rattus norvegicus nuclear transcription factor-Y gamma (Nfyc), mRNA [NM_012866]                                                                                        | NM_012866    |
| <b>1.95</b>  | 3.86 | Increase | 2.91  | 0.00885347 | 0.2349 | similar to Antxr2 protein                                                        | PREDICTED: Rattus norvegicus similar to Antxr2 protein (LOC305633), mRNA [XM_223745]                                                                                   | XM_223745    |
| <b>-1.76</b> | 3.39 | Decrease | -2.90 | 0.00898534 | 0.2371 | AW141373                                                                         | AW141373 EST291414 Normalized rat brain, Bento Soares Rattus sp. cDNA clone RGIBP89 5' end similar to neural cell adhesion molecule NCAM-120, mRNA sequence [AW141373] | AW141373     |
| <b>1.77</b>  | 3.41 | Increase | 2.88  | 0.00952512 | 0.2448 | histone cluster 1, H2bm (predicted)                                              | PREDICTED: Rattus norvegicus histone 1, H2bm (predicted)                                                                                                               | XM_341530    |

|              |      |                 |       |            |        |                                               |                                                                                                                         |              |
|--------------|------|-----------------|-------|------------|--------|-----------------------------------------------|-------------------------------------------------------------------------------------------------------------------------|--------------|
|              |      |                 |       |            |        |                                               | (Hist1h2bm_predicted), mRNA [XM_341530]                                                                                 |              |
| <b>-1.55</b> | 2.92 | <b>Decrease</b> | -2.88 | 0.00952634 | 0.2448 | titin                                         | PREDICTED: Rattus norvegicus titin (Ttn), mRNA [XM_001065955]                                                           | XM_001065955 |
| <b>1.05</b>  | 2.07 | <b>Increase</b> | 2.88  | 0.0095292  | 0.2448 | TPA regulated locus                           | Rattus norvegicus TPA regulated locus (Tparl), mRNA [NM_001024802]                                                      | NM_001024802 |
| <b>-2.96</b> | 7.80 | <b>Decrease</b> | -2.87 | 0.0096271  | 0.2454 | XM_239603                                     | Rattus norvegicus similar to RIKEN cDNA 1300006M19 (LOC304282), mRNA [XM_239603]                                        | XM_239603    |
| <b>1.66</b>  | 3.17 | <b>Increase</b> | 2.86  | 0.00984004 | 0.2471 | Uap1_predicted                                | PREDICTED: Rattus norvegicus UDP-N-acetylglucosamine pyrophosphorylase 1 (predicted) (Uap1_predicted), mRNA [XM_222863] | XM_222863    |
| <b>1.55</b>  | 2.94 | <b>Increase</b> | 2.86  | 0.00990568 | 0.2482 | zinc finger protein 579 (predicted)           | PREDICTED: Rattus norvegicus zinc finger protein 579 (predicted) (Znf579_predicted), mRNA [XM_218200]                   | XM_218200    |
| <b>2.23</b>  | 4.69 | <b>Increase</b> | 2.86  | 0.0099432  | 0.2486 | leucine rich repeat containing 30 (predicted) | PREDICTED: Rattus norvegicus leucine rich repeat containing 30 (predicted) (Lrrc30_predicted), mRNA [XM_237538]         | XM_237538    |
| <b>-1.46</b> | 2.76 | <b>Decrease</b> | -2.85 | 0.00996867 | 0.2486 | netrin 2-like (chicken)                       | PREDICTED: Rattus norvegicus netrin 2-like (chicken) (Ntn2l), mRNA [XM_343867]                                          | XM_343867    |
| <b>1.23</b>  | 2.35 | <b>Increase</b> | 2.85  | 0.01001135 | 0.2486 | procollagen, type VI, alpha 2                 | PREDICTED: Rattus norvegicus procollagen, type VI, alpha 2 (Col6a2), mRNA [XM_342115]                                   | XM_342115    |
| <b>-1.37</b> | 2.59 | <b>Decrease</b> | -2.85 | 0.01011066 | 0.2493 | RGD1565416_predicted                          | PREDICTED: Rattus norvegicus similar to talin 2 (predicted) (RGD1565416_predicted), mRNA [XM_236367]                    | XM_236367    |

|              |      |                 |       |            |        |                                                                                                                 |                                                                                                                                                                                  |           |
|--------------|------|-----------------|-------|------------|--------|-----------------------------------------------------------------------------------------------------------------|----------------------------------------------------------------------------------------------------------------------------------------------------------------------------------|-----------|
| <b>2.35</b>  | 5.10 | <b>Increase</b> | 2.84  | 0.01022892 | 0.2505 | TC536217                                                                                                        | Q800A3 (Q800A3) Ddx49-A-prov protein (Fragment), partial (23%) [TC536217]                                                                                                        |           |
| <b>-1.27</b> | 2.40 | <b>Decrease</b> | -2.84 | 0.01026295 | 0.2510 | acyl-Coenzyme A dehydrogenase family, member 11 (predicted)                                                     | PREDICTED: Rattus norvegicus acyl-Coenzyme A dehydrogenase family, member 11 (predicted) (Acad11_predicted), mRNA [XM_236582]                                                    | XM_236582 |
| <b>-1.03</b> | 2.04 | <b>Decrease</b> | -2.84 | 0.01034504 | 0.2519 | hect (homologous to the E6-AP (UBE3A) carboxyl terminus) domain and RCC1 (CHC1)-like domain (RLD) 2 (predicted) | PREDICTED: Rattus norvegicus hect (homologous to the E6-AP (UBE3A) carboxyl terminus) domain and RCC1 (CHC1)-like domain (RLD) 2 (predicted) (Herc2_predicted), mRNA [XM_218720] | XM_218720 |
| <b>-1.14</b> | 2.21 | <b>Decrease</b> | -2.84 | 0.01036428 | 0.2521 | zinc finger and BTB domain containing 25                                                                        | Rattus norvegicus zinc finger and BTB domain containing 25 (Zbtb25), mRNA [NM_199496]                                                                                            | NM_199496 |
| <b>-1.59</b> | 3.00 | <b>Decrease</b> | -2.83 | 0.01046023 | 0.2536 | doublesex and mab-3 related transcription factor like family A2 (predicted)                                     | PREDICTED: Rattus norvegicus doublesex and mab-3 related transcription factor like family A2 (predicted) (Dmrta2_predicted), mRNA [XM_233363]                                    | XM_233363 |
| <b>1.26</b>  | 2.40 | <b>Increase</b> | 2.82  | 0.01067749 | 0.2553 | similar to protein phosphatase 1, regulatory (inhibitor) subunit 1C (predicted)                                 | BG670819 DRNBGB03 Rat DRG Library Rattus norvegicus cDNA clone DRNBGB03 5', mRNA sequence [BG670819]                                                                             | BG670819  |
| <b>1.83</b>  | 3.56 | <b>Increase</b> | 2.82  | 0.01074371 | 0.2554 | BF407382                                                                                                        | BF407382 UI-R-BJ2-bqd-d-06-0-UI.s1 UI-R-BJ2 Rattus norvegicus cDNA clone UI-R-BJ2-bqd-d-06-0-UI 3', mRNA sequence [BF407382]                                                     | BF407382  |
| <b>1.54</b>  | 2.90 | <b>Increase</b> | 2.81  | 0.01088406 | 0.2577 | angiotensin II receptor, type 1 (AT1A)                                                                          | Rattus norvegicus angiotensin II receptor, type 1 (AT1A) (Agtr1a), mRNA [NM_030985]                                                                                              | NM_030985 |

|              |      |                 |       |            |        |                                                                               |                                                                                                                                                                   |              |
|--------------|------|-----------------|-------|------------|--------|-------------------------------------------------------------------------------|-------------------------------------------------------------------------------------------------------------------------------------------------------------------|--------------|
| <b>1.62</b>  | 3.07 | <b>Increase</b> | 2.81  | 0.01092323 | 0.2579 | death effector domain-containing                                              | Rattus norvegicus death effector domain-containing (Dedd), mRNA [NM_031800]                                                                                       | NM_031800    |
| <b>-1.32</b> | 2.49 | <b>Decrease</b> | -2.81 | 0.01095405 | 0.2583 | USP6 N-terminal like (predicted)                                              | Rattus norvegicus similar to Expressed sequence AI316785 (LOC291309), mRNA [XM_214508]                                                                            | XM_214508    |
| <b>1.01</b>  | 2.01 | <b>Increase</b> | 2.81  | 0.01097683 | 0.2587 | transmembrane protein 87A (predicted)                                         | PREDICTED: Rattus norvegicus transmembrane protein 87A (predicted) (Tmem87a_predicted), mRNA [XM_345422]                                                          | XM_345422    |
| <b>-1.41</b> | 2.65 | <b>Decrease</b> | -2.81 | 0.01098555 | 0.2587 | diamine oxidase-like protein 1                                                | Rattus norvegicus diamine oxidase-like protein 1 (Doxl1), mRNA [NM_199233]                                                                                        | NM_199233    |
| <b>-2.37</b> | 5.16 | <b>Decrease</b> | -2.81 | 0.01108028 | 0.2595 | similar to HTGN29 protein; keratinocytes associated transmembrane protein 2   | PREDICTED: Rattus norvegicus similar to HTGN29 protein; keratinocytes associated transmembrane protein 2 (RGD1310352), mRNA [XM_220404]                           | XM_220404    |
| <b>-1.31</b> | 2.48 | <b>Decrease</b> | -2.81 | 0.01108456 | 0.2595 | similar to RNA binding motif, single stranded interacting protein 3 isoform 1 | PREDICTED: Rattus norvegicus similar to RNA binding motif, single stranded interacting protein 3 isoform 1, transcript variant 5 (LOC680726), mRNA [XM_001061391] | XM_001061391 |
| <b>-1.01</b> | 2.02 | <b>Decrease</b> | -2.80 | 0.01122104 | 0.2606 | phospholipase C, beta 4                                                       | Rattus norvegicus phospholipase C, beta 4 (Plcb4), mRNA [NM_024353]                                                                                               | NM_024353    |
| <b>-1.24</b> | 2.36 | <b>Decrease</b> | -2.80 | 0.01127263 | 0.2612 | similar to RIKEN cDNA 1700081O22                                              | Rattus norvegicus similar to RIKEN cDNA 1700081O22 (LOC367515), mRNA [NM_001014271]                                                                               | NM_001014271 |
| <b>-1.04</b> | 2.05 | <b>Decrease</b> | -2.79 | 0.01151578 | 0.2641 | ryanodine receptor 1, skeletal muscle                                         | PREDICTED: Rattus norvegicus ryanodine receptor 1, skeletal muscle (Ryr1), mRNA [XM_341818]                                                                       | XM_341818    |



|       |       |          |       |            |        |                                               |                                                                                                                         |              |
|-------|-------|----------|-------|------------|--------|-----------------------------------------------|-------------------------------------------------------------------------------------------------------------------------|--------------|
| -1.89 | 3.71  | Decrease | -2.79 | 0.01161151 | 0.2644 | M33313                                        | RATCYP2A21 Rat hepatic steroid hydroxylase IIA2 (CYP2A2) gene, exons 1 and 2 [M33313]                                   | M33313       |
| 1.08  | 2.11  | Increase | 2.78  | 0.01166414 | 0.2647 | serine/threonine kinase 16                    | Rattus norvegicus serine/threonine kinase 16 (Stk16), mRNA [NM_173142]                                                  | NM_173142    |
| 1.55  | 2.92  | Increase | 2.78  | 0.01186883 | 0.2667 | choline/ethanolamine phosphotransferase 1     | Rattus norvegicus choline/ethanolamine phosphotransferase 1 (Cept1), mRNA [NM_001007699]                                | NM_001007699 |
| -1.18 | 2.27  | Decrease | -2.78 | 0.01186922 | 0.2667 | ENSRNOT00000027501                            | Rattus norvegicus LRRGT00043 mRNA, complete cds. [AY383698]                                                             | AY383698     |
| 1.70  | 3.25  | Increase | 2.77  | 0.01200626 | 0.2667 | Ac1258                                        | Rattus norvegicus Ac1258 mRNA, complete cds. [AY310151]                                                                 | AY310151     |
| -2.84 | 7.18  | Decrease | -2.77 | 0.01203121 | 0.2668 | Ttn                                           | PREDICTED: Rattus norvegicus titin (Ttn), mRNA [XM_001065955]                                                           | XM_001065955 |
| 1.27  | 2.42  | Increase | 2.76  | 0.01222808 | 0.2689 | gap junction membrane channel protein alpha 7 | PREDICTED: Rattus norvegicus gap junction membrane channel protein alpha 7 (Gja7), mRNA [XM_001081521]                  | XM_001081521 |
| -4.65 | 25.02 | Decrease | -2.76 | 0.01223386 | 0.2689 | BF550568                                      | BF550568 UI-R-C0-jl-b-08-0-UI.r1 UI-R-C0 Rattus norvegicus cDNA clone UI-R-C0-jl-b-08-0-UI 5', mRNA sequence [BF550568] | BF550568     |
| 1.06  | 2.09  | Increase | 2.76  | 0.01228861 | 0.2692 | Josephin domain containing 2 (predicted)      | PREDICTED: Rattus norvegicus Josephin domain containing 2 (predicted) (Josd2_predicted), mRNA [XM_214929]               | XM_214929    |
| 1.27  | 2.41  | Increase | 2.75  | 0.01260622 | 0.2731 | TC521066                                      | Q49846 (Q49846) B2235_C3_243 (Possible conserved membrane protein), partial (7%) [TC521066]                             |              |
| 1.54  | 2.91  | Increase | 2.75  | 0.0126117  | 0.2731 | non-metastatic cells 7, protein expressed in  | Rattus norvegicus non-metastatic cells 7, protein expressed in (Nme7), mRNA [NM_138532]                                 | NM_138532    |

|              |      |          |       |            |        |                                                          |                                                                                                                              |              |
|--------------|------|----------|-------|------------|--------|----------------------------------------------------------|------------------------------------------------------------------------------------------------------------------------------|--------------|
| <b>-1.48</b> | 2.79 | Decrease | -2.75 | 0.01264704 | 0.2733 | ubiquitin specific peptidase 9, X chromosome (predicted) | PREDICTED: Rattus norvegicus ubiquitin specific peptidase 9, X chromosome (predicted) (Usp9x_predicted), mRNA [XM_343766]    | XM_343766    |
| <b>1.04</b>  | 2.06 | Increase | 2.74  | 0.01292742 | 0.2768 | BI301310                                                 | UI-R-DLO-cio-f-15-0-UI.s1 UI-R-DLO Rattus norvegicus cDNA clone UI-R-DLO-cio-f-15-0-UI 3', mRNA sequence [BI301310]          | BI301310     |
| <b>-2.30</b> | 4.91 | Decrease | -2.73 | 0.0130034  | 0.2773 | MAM domain containing 4                                  | Rattus norvegicus MAM domain containing 4 (Mamdc4), mRNA [NM_145768]                                                         | NM_145768    |
| <b>-2.07</b> | 4.20 | Decrease | -2.73 | 0.0131755  | 0.2786 | myosin Va                                                | Rattus norvegicus myosin Va (Myo5a), mRNA [NM_022178]                                                                        | NM_022178    |
| <b>1.00</b>  | 2.00 | Increase | 2.73  | 0.01320504 | 0.2787 | procollagen, type 1, alpha 1                             | PREDICTED: Rattus norvegicus procollagen, type 1, alpha 1 (Col1a1), mRNA [XM_213440]                                         | XM_213440    |
| <b>1.30</b>  | 2.46 | Increase | 2.72  | 0.01325323 | 0.2790 | LOC683544                                                | PREDICTED: Rattus norvegicus similar to proline rich membrane anchor 1 (LOC683544), mRNA [XM_001066450]                      | XM_001066450 |
| <b>1.07</b>  | 2.10 | Increase | 2.72  | 0.0133098  | 0.2796 | similar to RIKEN cDNA 5830446M03                         | Rattus norvegicus similar to RIKEN cDNA 5830446M03 (RGD1307688), mRNA [NM_001014188]                                         | NM_001014188 |
| <b>1.23</b>  | 2.34 | Increase | 2.71  | 0.01366456 | 0.2832 | tripartite motif-containing 42                           | Rattus norvegicus tripartite motif-containing 42 (Trim42), mRNA [NM_001013955]                                               | NM_001013955 |
| <b>-1.19</b> | 2.29 | Decrease | -2.71 | 0.01375115 | 0.2837 | nischarin                                                | PREDICTED: Rattus norvegicus nischarin (Nisch), mRNA [XM_240330]                                                             | XM_240330    |
| <b>-1.28</b> | 2.42 | Decrease | -2.70 | 0.01386863 | 0.2849 | BF408265                                                 | BF408265 UI-R-BJ2-bqr-c-10-0-UI.s1 UI-R-BJ2 Rattus norvegicus cDNA clone UI-R-BJ2-bqr-c-10-0-UI 3', mRNA sequence [BF408265] | BF408265     |

|              |      |                 |       |            |        |                                                              |                                                                                                                               |              |
|--------------|------|-----------------|-------|------------|--------|--------------------------------------------------------------|-------------------------------------------------------------------------------------------------------------------------------|--------------|
| <b>1.08</b>  | 2.12 | <b>Increase</b> | 2.70  | 0.01390994 | 0.2850 | similar to exosome component 1                               | PREDICTED: Rattus norvegicus similar to exosome component 1 (LOC679140), mRNA [XM_001054866]                                  | XM_001054866 |
| <b>1.25</b>  | 2.37 | <b>Increase</b> | 2.70  | 0.01392796 | 0.2850 | SRY-box containing gene 4 (predicted)                        | PREDICTED: Rattus norvegicus SRY-box containing gene 4 (predicted) (Sox4_predicted), mRNA [XM_344594]                         | XM_344594    |
| <b>-1.44</b> | 2.71 | <b>Decrease</b> | -2.70 | 0.01393741 | 0.2850 | microtubule associated serine/threonine kinase 2 (predicted) | PREDICTED: Rattus norvegicus microtubule associated serine/threonine kinase 2 (predicted) (Mast2_predicted), mRNA [XM_233782] | XM_233782    |
| <b>1.91</b>  | 3.75 | <b>Increase</b> | 2.70  | 0.01394159 | 0.2850 | BF393048                                                     | BF393048 UI-R-CA0-bgp-e-04-0-UI.s1 UI-R-CA0 Rattus norvegicus cDNA clone UI-R-CA0-bgp-e-04-0-UI 3', mRNA sequence [BF393048]  | BF393048     |
| <b>1.23</b>  | 2.34 | <b>Increase</b> | 2.70  | 0.01402709 | 0.2855 | BI277534                                                     | UI-R-CY0-bxs-d-02-0-UI.s1 UI-R-CY0 Rattus norvegicus cDNA clone UI-R-CY0-bxs-d-02-0-UI 3', mRNA sequence [BI277534]           | BI277534     |
| <b>-1.06</b> | 2.09 | <b>Decrease</b> | -2.70 | 0.01408667 | 0.2859 | AW144275                                                     | AW144275 EST294571 Normalized rat ovary, Bento Soares Rattus sp. cDNA clone RGICP06 5' end, mRNA sequence [AW144275]          | AW144275     |
| <b>1.29</b>  | 2.45 | <b>Increase</b> | 2.69  | 0.0141436  | 0.2864 | similar to G2 (predicted)                                    | PREDICTED: Rattus norvegicus similar to G2 (predicted) (RGD1310754_predicted), mRNA [XM_001079537]                            | XM_001079537 |
| <b>1.26</b>  | 2.40 | <b>Increase</b> | 2.69  | 0.01422858 | 0.2869 | XM_214487                                                    | Rattus norvegicus similar to RIKEN cDNA 5730599009 (LOC291188), mRNA [XM_214487]                                              | XM_214487    |
| <b>2.07</b>  | 4.20 | <b>Increase</b> | 2.69  | 0.01426916 | 0.2874 | artemin                                                      | Rattus norvegicus artemin (Artn), mRNA [NM_053397]                                                                            | NM_053397    |

|              |      |                 |       |            |        |                                                                                             |                                                                                                                                                             |              |
|--------------|------|-----------------|-------|------------|--------|---------------------------------------------------------------------------------------------|-------------------------------------------------------------------------------------------------------------------------------------------------------------|--------------|
| <b>1.93</b>  | 3.81 | <b>Increase</b> | 2.68  | 0.01460522 | 0.2893 | brain-specific angiogenesis inhibitor 1-associated protein 2                                | Rattus norvegicus brain-specific angiogenesis inhibitor 1-associated protein 2 (Baia2), mRNA [NM_057196]                                                    | NM_057196    |
| <b>1.40</b>  | 2.65 | <b>Increase</b> | 2.68  | 0.01466533 | 0.2894 | tumor necrosis factor (ligand) superfamily, member 13                                       | Rattus norvegicus tumor necrosis factor (ligand) superfamily, member 13 (Tnfsf13), mRNA [NM_001009623]                                                      | NM_001009623 |
| <b>-1.32</b> | 2.49 | <b>Decrease</b> | -2.68 | 0.01472376 | 0.2896 | AW918233                                                                                    | AW918233 EST349537 Rat gene index, normalized rat, norvegicus, Bento Soares Rattus norvegicus cDNA clone RGIEO19 5' end, mRNA sequence [AW918233]           | AW918233     |
| <b>-1.03</b> | 2.04 | <b>Decrease</b> | -2.67 | 0.01481576 | 0.2904 | AI236318                                                                                    | EST232880 Normalized rat ovary, Bento Soares Rattus sp. cDNA clone ROVDE13 3' end, mRNA sequence [AI236318]                                                 | AI236318     |
| <b>1.08</b>  | 2.12 | <b>Increase</b> | 2.67  | 0.01490865 | 0.2912 | Col11a1                                                                                     | PREDICTED: Rattus norvegicus procollagen, type XI, alpha 1 (Col11a1), mRNA [XM_342325]                                                                      | XM_342325    |
| <b>-1.18</b> | 2.26 | <b>Decrease</b> | -2.67 | 0.01505742 | 0.2923 | CO388689                                                                                    | AGENCOURT_26625193 NIH_MGC_253 Rattus norvegicus cDNA clone IMAGE:7304073 5', mRNA sequence [CO388689]                                                      | CO388689     |
| <b>1.17</b>  | 2.25 | <b>Increase</b> | 2.66  | 0.01519363 | 0.2936 | TAF7 RNA polymerase II, TATA box binding protein (TBP)-associated factor, 55kDa (predicted) | PREDICTED: Rattus norvegicus TAF7 RNA polymerase II, TATA box binding protein (TBP)-associated factor, 55kDa (predicted) (Taf7_predicted), mRNA [XM_226031] | XM_226031    |
| <b>1.24</b>  | 2.36 | <b>Increase</b> | 2.66  | 0.01523302 | 0.2939 | sal-like 3 (Drosophila) (predicted)                                                         | PREDICTED: Rattus norvegicus sal-like 3 (Drosophila) (predicted) (Sall3_predicted), mRNA [XM_344708]                                                        | XM_344708    |

|              |       |          |       |            |        |                                                                                                |                                                                                                                                                              |              |
|--------------|-------|----------|-------|------------|--------|------------------------------------------------------------------------------------------------|--------------------------------------------------------------------------------------------------------------------------------------------------------------|--------------|
| <b>-1.31</b> | 2.48  | Decrease | -2.66 | 0.01533722 | 0.2946 | Dst_predicted                                                                                  | PREDICTED: Rattus norvegicus dystonin (predicted) (Dst_predicted), mRNA [XM_237042]                                                                          | XM_237042    |
| <b>1.07</b>  | 2.09  | Increase | 2.65  | 0.01548465 | 0.2954 | protein phosphatase 1, regulatory (inhibitor) subunit 14A                                      | Rattus norvegicus protein phosphatase 1, regulatory (inhibitor) subunit 14A (Ppp1r14a), mRNA [NM_130403]                                                     | NM_130403    |
| <b>-1.50</b> | 2.84  | Decrease | -2.65 | 0.01551369 | 0.2955 | AW920343                                                                                       | AW920343 EST351647 Rat gene index, normalized rat, norvegicus, Bento Soares Rattus norvegicus cDNA clone RGIGU32 5' end, mRNA sequence [AW920343]            | AW920343     |
| <b>1.05</b>  | 2.07  | Increase | 2.65  | 0.01556498 | 0.2957 | similar to Tetraspanin-15 (Tspan-15) (Transmembrane 4 superfamily member 15) (Tetraspan NET-7) | PREDICTED: Rattus norvegicus similar to Tetraspanin-15 (Tspan-15) (Transmembrane 4 superfamily member 15) (Tetraspan NET-7) (LOC679462), mRNA [XM_001056482] | XM_001056482 |
| <b>1.83</b>  | 3.56  | Increase | 2.65  | 0.01572027 | 0.2964 | LOC679596                                                                                      | PREDICTED: Rattus norvegicus similar to GABA(A) receptor-associated protein like 2 (LOC679596), mRNA [XM_001053633]                                          | XM_001053633 |
| <b>-2.07</b> | 4.21  | Decrease | -2.64 | 0.01577634 | 0.2968 | period homolog 2 (Drosophila)                                                                  | Rattus norvegicus period homolog 2 (Drosophila) (Per2), mRNA [NM_031678]                                                                                     | NM_031678    |
| <b>-3.48</b> | 11.15 | Decrease | -2.64 | 0.01602261 | 0.2994 | AI008646                                                                                       | AI008646 EST203097 Normalized rat embryo, Bento Soares Rattus sp. cDNA clone REMBB18 3' end, mRNA sequence [AI008646]                                        | AI008646     |
| <b>-1.16</b> | 2.24  | Decrease | -2.64 | 0.01604015 | 0.2994 | similar to KIAA0853 protein (predicted)                                                        | PREDICTED: Rattus norvegicus similar to KIAA0853 protein (predicted)                                                                                         | XM_573801    |

|              |      |                 |       |            |        |                                                                                                                                         |                                                                                                                                                                                                       |              |
|--------------|------|-----------------|-------|------------|--------|-----------------------------------------------------------------------------------------------------------------------------------------|-------------------------------------------------------------------------------------------------------------------------------------------------------------------------------------------------------|--------------|
|              |      |                 |       |            |        |                                                                                                                                         | (RGD1563689_predicted), mRNA [XM_573801]                                                                                                                                                              |              |
| <b>1.59</b>  | 3.00 | <b>Increase</b> | 2.64  | 0.01609348 | 0.3001 | schlafen 2 (predicted)                                                                                                                  | PREDICTED: Rattus norvegicus schlafen 2 (predicted) (Slfn2_predicted), mRNA [XM_220779]                                                                                                               | XM_220779    |
| <b>1.38</b>  | 2.60 | <b>Increase</b> | 2.63  | 0.01628676 | 0.3022 | cathepsin K                                                                                                                             | Rattus norvegicus cathepsin K (Ctsk), mRNA [NM_031560]                                                                                                                                                | NM_031560    |
| <b>1.21</b>  | 2.31 | <b>Increase</b> | 2.63  | 0.01643612 | 0.3039 | drebrin 1                                                                                                                               | Rattus norvegicus drebrin 1 (Dbn1), mRNA [NM_031024]                                                                                                                                                  | NM_031024    |
| <b>1.17</b>  | 2.26 | <b>Increase</b> | 2.62  | 0.0165623  | 0.3047 | v-ral simian leukemia viral oncogene homolog B                                                                                          | Rattus norvegicus v-ral simian leukemia viral oncogene homolog B (Ralb), mRNA [NM_053821]                                                                                                             | NM_053821    |
| <b>1.04</b>  | 2.06 | <b>Increase</b> | 2.62  | 0.01657829 | 0.3049 | TC562057                                                                                                                                | Q8R0F4 (Q8R0F4) BC026978 protein (Fragment), partial (20%) [TC562057]                                                                                                                                 |              |
| <b>-1.82</b> | 3.53 | <b>Decrease</b> | -2.62 | 0.01659621 | 0.3051 | protein kinase, cGMP-dependent, type 1 (mapped)                                                                                         | PREDICTED: Rattus norvegicus protein kinase, cGMP-dependent, type 1 (mapped) (Prkg1_mapped), mRNA [XM_219805]                                                                                         | XM_219805    |
| <b>-1.28</b> | 2.44 | <b>Decrease</b> | -2.61 | 0.01681984 | 0.3067 | supervillin (predicted)                                                                                                                 | PREDICTED: Rattus norvegicus supervillin (predicted) (Svil_predicted), mRNA [XM_341540]                                                                                                               | XM_341540    |
| <b>-1.58</b> | 3.00 | <b>Decrease</b> | -2.61 | 0.01689749 | 0.3073 | similar to Myeloid/lymphoid or mixed-lineage leukemia protein 3 homolog (Histone-lysine N-methyltransferase, H3 lysine-4 specific MLL3) | PREDICTED: Rattus norvegicus similar to Myeloid/lymphoid or mixed-lineage leukemia protein 3 homolog (Histone-lysine N-methyltransferase, H3 lysine-4 specific MLL3) (LOC679252), mRNA [XM_001054661] | XM_001054661 |
| <b>-1.43</b> | 2.69 | <b>Decrease</b> | -2.61 | 0.01697028 | 0.3078 | transient receptor potential cation channel, subfamily C, member 1                                                                      | Rattus norvegicus transient receptor potential cation channel, subfamily C, member 1 (Trpc1), mRNA [NM_053558]                                                                                        | NM_053558    |

|              |      |                 |       |            |        |                                                         |                                                                                                                              |              |
|--------------|------|-----------------|-------|------------|--------|---------------------------------------------------------|------------------------------------------------------------------------------------------------------------------------------|--------------|
| <b>1.50</b>  | 2.83 | <b>Increase</b> | 2.61  | 0.01700255 | 0.3078 | thrombospondin 2                                        | PREDICTED: Rattus norvegicus thrombospondin 2 (Thbs2), mRNA [XM_214778]                                                      | XM_214778    |
| <b>1.10</b>  | 2.14 | <b>Increase</b> | 2.61  | 0.01704674 | 0.3079 | TC541278                                                | Q8R4C3 (Q8R4C3) Csr1, partial (33%) [TC541278]                                                                               |              |
| <b>2.81</b>  | 7.03 | <b>Increase</b> | 2.61  | 0.01707904 | 0.3081 | chondroadherin                                          | Rattus norvegicus chondroadherin (Chad), mRNA [NM_019164]                                                                    | NM_019164    |
| <b>-1.11</b> | 2.16 | <b>Decrease</b> | -2.60 | 0.01718253 | 0.3092 | olfactory receptor 157 (predicted)                      | Rattus norvegicus olfactory receptor 157 (predicted) (Olr157_predicted), mRNA [NM_001000169]                                 | NM_001000169 |
| <b>1.68</b>  | 3.21 | <b>Increase</b> | 2.60  | 0.01732919 | 0.3109 | AA955229                                                | AA955229 UI-R-A1-ej-f-11-0-UI.s1 UI-R-A1 Rattus norvegicus cDNA clone UI-R-A1-ej-f-11-0-UI 3' similar to gi [AA955229]       | AA955229     |
| <b>-1.27</b> | 2.42 | <b>Decrease</b> | -2.60 | 0.01743481 | 0.3119 | LOC679811                                               | PREDICTED: Rattus norvegicus similar to RIKEN cDNA D930015E06, transcript variant 3 (LOC679811), mRNA [XM_001054550]         | XM_001054550 |
| <b>1.04</b>  | 2.05 | <b>Increase</b> | 2.60  | 0.01751446 | 0.3123 | XM_346216                                               | Rattus norvegicus similar to Itga6 protein (LOC367576), mRNA [XM_346216]                                                     | XM_346216    |
| <b>1.11</b>  | 2.16 | <b>Increase</b> | 2.60  | 0.0175352  | 0.3124 | AW529005                                                | AW529005 UI-R-BT1-aka-a-11-0-UI.s1 UI-R-BT1 Rattus norvegicus cDNA clone UI-R-BT1-aka-a-11-0-UI 3', mRNA sequence [AW529005] | AW529005     |
| <b>1.33</b>  | 2.52 | <b>Increase</b> | 2.59  | 0.01782956 | 0.3142 | similar to Ext1                                         | PREDICTED: Rattus norvegicus similar to Ext1 (LOC299907), mRNA [XM_216920]                                                   | XM_216920    |
| <b>1.58</b>  | 2.99 | <b>Increase</b> | 2.58  | 0.01793143 | 0.3153 | AA850885                                                | AA850885 EST193653 Normalized rat ovary, Bento Soares Rattus sp. cDNA clone ROVAO01 3' end, mRNA sequence [AA850885]         | AA850885     |
| <b>1.11</b>  | 2.16 | <b>Increase</b> | 2.58  | 0.01830055 | 0.3178 | similar to ADP-ribosylation factor-like 10B (predicted) | PREDICTED: Rattus norvegicus similar to ADP-ribosylation factor-                                                             | XM_573456    |

|              |      |                 |       |            |        |                                                |                                                                                                                                             |              |
|--------------|------|-----------------|-------|------------|--------|------------------------------------------------|---------------------------------------------------------------------------------------------------------------------------------------------|--------------|
|              |      |                 |       |            |        |                                                | like 10B (predicted)<br>(RGD1565940_predicted), mRNA<br>[XM_573456]                                                                         |              |
| <b>-3.12</b> | 8.70 | <b>Decrease</b> | -2.57 | 0.01838832 | 0.3189 | AW144502                                       | AW144502 EST294879 Normalized rat embryo, Bento Soares Rattus sp. cDNA clone RGIAM10 5' end, mRNA sequence [AW144502]                       | AW144502     |
| <b>1.04</b>  | 2.06 | <b>Increase</b> | 2.57  | 0.01841647 | 0.3191 | AW143671                                       | AW143671 EST293967 Normalized rat embryo, Bento Soares Rattus sp. cDNA clone RGBX76 5' end, mRNA sequence [AW143671]                        | AW143671     |
| <b>1.24</b>  | 2.37 | <b>Increase</b> | 2.57  | 0.01842896 | 0.3191 | promethin                                      | Rattus norvegicus promethin (LOC378467), mRNA [NM_194354]                                                                                   | NM_194354    |
| <b>1.19</b>  | 2.27 | <b>Increase</b> | 2.57  | 0.01843961 | 0.3191 | acyl-Coenzyme A binding domain containing 4    | Rattus norvegicus acyl-Coenzyme A binding domain containing 4 (Acbd4), mRNA [NM_001012013]                                                  | NM_001012013 |
| <b>1.35</b>  | 2.54 | <b>Increase</b> | 2.57  | 0.01852726 | 0.3195 | hypothetical protein LOC499856                 | Rattus norvegicus hypothetical protein LOC499856 (LOC499856), mRNA [NM_001025042]                                                           | NM_001025042 |
| <b>-1.04</b> | 2.05 | <b>Decrease</b> | -2.57 | 0.01859502 | 0.3198 | similar to RIKEN cDNA E130308A19 (predicted)   | PREDICTED: Rattus norvegicus similar to RIKEN cDNA E130308A19 (predicted), transcript variant 2 (RGD1310951_predicted), mRNA [XM_001056694] | XM_001056694 |
| <b>2.98</b>  | 7.87 | <b>Increase</b> | 2.57  | 0.01859884 | 0.3198 | TC535418                                       | Q6PD06 (Q6PD06) Cdc23 protein, partial (24%) [TC535418]                                                                                     |              |
| <b>1.24</b>  | 2.37 | <b>Increase</b> | 2.57  | 0.01863681 | 0.3202 | Usher syndrome 1C homolog (human)              | Rattus norvegicus harmonin a1 (Ush1c) mRNA, complete cds; alternatively spliced [AY588414]                                                  | AY588414     |
| <b>1.36</b>  | 2.58 | <b>Increase</b> | 2.57  | 0.01869699 | 0.3205 | CDC23 (cell division cycle 23, yeast, homolog) | Rattus norvegicus similar to cell division cycle protein 23; anaphase-promoting complex subunit 8 (LOC291689), mRNA [XM_214588]             | XM_214588    |



|              |      |                 |       |            |        |                                                       |                                                                                                                                      |              |
|--------------|------|-----------------|-------|------------|--------|-------------------------------------------------------|--------------------------------------------------------------------------------------------------------------------------------------|--------------|
| <b>1.04</b>  | 2.05 | <b>Increase</b> | 2.56  | 0.01900729 | 0.3233 | AA925266                                              | AA925266 UI-R-A1-ee-f-06-0-UI.s1<br>UI-R-A1 Rattus norvegicus cDNA<br>clone UI-R-A1-ee-f-06-0-UI 3', mRNA<br>sequence [AA925266]     | AA925266     |
| <b>1.38</b>  | 2.61 | <b>Increase</b> | 2.56  | 0.01903899 | 0.3233 | pyrimidinerbic receptor P2Y, G-<br>protein coupled, 6 | Rattus norvegicus pyrimidinerbic<br>receptor P2Y, G-protein coupled, 6<br>(P2ry6), mRNA [NM_057124]                                  | NM_057124    |
| <b>1.52</b>  | 2.86 | <b>Increase</b> | 2.56  | 0.01904764 | 0.3233 | cytochrome b5 reductase 3                             | Rattus norvegicus cytochrome b5<br>reductase 3 (Cyb5r3), mRNA<br>[NM_138877]                                                         | NM_138877    |
| <b>1.07</b>  | 2.09 | <b>Increase</b> | 2.56  | 0.01907299 | 0.3233 | prepro-Neuropeptide W polypeptide                     | Rattus norvegicus prepro-<br>Neuropeptide W polypeptide<br>(LOC259224), mRNA [NM_153294]                                             | NM_153294    |
| <b>1.45</b>  | 2.74 | <b>Increase</b> | 2.56  | 0.01908543 | 0.3233 | LOC682841                                             | PREDICTED: Rattus norvegicus<br>similar to H3 histone, family 3B<br>(LOC682841), mRNA<br>[XM_001063350]                              | XM_001063350 |
| <b>-1.13</b> | 2.19 | <b>Decrease</b> | -2.55 | 0.01923209 | 0.3237 | vacuolar protein sorting 13D (yeast)<br>(predicted)   | PREDICTED: Rattus norvegicus<br>vacuolar protein sorting 13D (yeast)<br>(predicted) (Vps13d_predicted),<br>mRNA [XM_233792]          | XM_233792    |
| <b>-1.16</b> | 2.23 | <b>Decrease</b> | -2.55 | 0.01929009 | 0.3238 | Bmpr2                                                 | PREDICTED: Rattus norvegicus bone<br>morphogenic protein receptor, type<br>II (serine/threonine kinase) (Bmpr2),<br>mRNA [XM_217409] | XM_217409    |
| <b>1.59</b>  | 3.01 | <b>Increase</b> | 2.54  | 0.01957363 | 0.3250 | angiopoietin-like 4                                   | Rattus norvegicus angiopoietin-like 4<br>(Angptl4), mRNA [NM_199115]                                                                 | NM_199115    |
| <b>1.26</b>  | 2.39 | <b>Increase</b> | 2.54  | 0.01967334 | 0.3260 | hypothetical protein LOC691995                        | PREDICTED: Rattus norvegicus<br>hypothetical protein LOC691995<br>(LOC691995), mRNA<br>[XM_001080750]                                | XM_001080750 |
| <b>1.71</b>  | 3.27 | <b>Increase</b> | 2.54  | 0.01972914 | 0.3265 | prostaglandin E synthase                              | Rattus norvegicus prostaglandin E<br>synthase (Ptges), mRNA<br>[NM_021583]                                                           | NM_021583    |

|              |      |          |       |            |        |                                              |                                                                                                                              |              |
|--------------|------|----------|-------|------------|--------|----------------------------------------------|------------------------------------------------------------------------------------------------------------------------------|--------------|
| <b>-1.93</b> | 3.82 | Decrease | -2.53 | 0.02010545 | 0.3290 | short form of beta II spectrin               | RNO242018 Rattus norvegicus mRNA for short form of beta II spectrin, partial [AJ242018]                                      | AJ242018     |
| <b>2.05</b>  | 4.15 | Increase | 2.53  | 0.02019218 | 0.3295 | similar to hypothetical protein (predicted)  | PREDICTED: Rattus norvegicus similar to hypothetical protein (predicted) (RGD1565522_predicted), mRNA [XM_237794]            | XM_237794    |
| <b>-1.10</b> | 2.15 | Decrease | -2.53 | 0.02025678 | 0.3297 | LOC688211                                    | PREDICTED: Rattus norvegicus hypothetical protein LOC688211 (LOC688211), mRNA [XM_001081514]                                 | XM_001081514 |
| <b>1.11</b>  | 2.16 | Increase | 2.53  | 0.02036398 | 0.3302 | AI177494                                     | AI177494 EST221126 Normalized rat placenta, Bento Soares Rattus sp. cDNA clone RPLCA67 3' end, mRNA sequence [AI177494]      | AI177494     |
| <b>1.57</b>  | 2.97 | Increase | 2.52  | 0.02038753 | 0.3302 | XM_345436                                    | Rattus norvegicus similar to 40S RIBOSOMAL PROTEIN S3A (V-FOS TRANSFORMATION EFFECTOR PROTEIN) (LOC366193), mRNA [XM_345436] | XM_345436    |
| <b>1.85</b>  | 3.60 | Increase | 2.52  | 0.02040549 | 0.3303 | BQ203347                                     | BQ203347 UI-R-DZ1-cnf-i-24-0-UI.s1 NCI_CGAP_DZ1 Rattus norvegicus cDNA clone IMAGE:7344962 3', mRNA sequence [BQ203347]      | BQ203347     |
| <b>-1.45</b> | 2.74 | Decrease | -2.52 | 0.02042297 | 0.3303 | similar to RIKEN cDNA 2310045A20 (predicted) | PREDICTED: Rattus norvegicus similar to RIKEN cDNA 2310045A20 (predicted) (RGD1562860_predicted), mRNA [XM_341223]           | XM_341223    |
| <b>1.25</b>  | 2.37 | Increase | 2.52  | 0.02060741 | 0.3318 | MUS81 endonuclease homolog (yeast)           | Rattus norvegicus MUS81 endonuclease homolog (yeast) (Mus81), mRNA [NM_001025645]                                            | NM_001025645 |

|              |      |                 |       |            |        |                                                                                                                 |                                                                                                                                                                                  |              |
|--------------|------|-----------------|-------|------------|--------|-----------------------------------------------------------------------------------------------------------------|----------------------------------------------------------------------------------------------------------------------------------------------------------------------------------|--------------|
| <b>1.02</b>  | 2.02 | <b>Increase</b> | 2.52  | 0.02069596 | 0.3328 | leukotriene C4 synthase                                                                                         | Rattus norvegicus leukotriene C4 synthase (Ltc4s), mRNA [NM_053639]                                                                                                              | NM_053639    |
| <b>-1.25</b> | 2.39 | <b>Decrease</b> | -2.52 | 0.0207058  | 0.3328 | hect (homologous to the E6-AP (UBE3A) carboxyl terminus) domain and RCC1 (CHC1)-like domain (RLD) 1 (predicted) | PREDICTED: Rattus norvegicus hect (homologous to the E6-AP (UBE3A) carboxyl terminus) domain and RCC1 (CHC1)-like domain (RLD) 1 (predicted) (Herc1_predicted), mRNA [XM_236362] | XM_236362    |
| <b>-1.76</b> | 3.38 | <b>Decrease</b> | -2.52 | 0.02072519 | 0.3328 | BF413313                                                                                                        | UI-R-BT1-bnw-d-07-0-UI.s1 UI-R-BT1 Rattus norvegicus cDNA clone UI-R-BT1-bnw-d-07-0-UI 3', mRNA sequence [BF413313]                                                              | BF413313     |
| <b>-1.85</b> | 3.61 | <b>Decrease</b> | -2.51 | 0.02086794 | 0.3337 | peptidyl-tRNA hydrolase 1 homolog (S. cerevisiae) (predicted)                                                   | PREDICTED: Rattus norvegicus peptidyl-tRNA hydrolase 1 homolog (S. cerevisiae) (predicted) (Ptrh1_predicted), mRNA [XM_342416]                                                   | XM_342416    |
| <b>1.55</b>  | 2.92 | <b>Increase</b> | 2.50  | 0.02128455 | 0.3377 | AI385133                                                                                                        | AI385133 UI-R-A0-ay-f-02-0-UI.s1 UI-R-A0 Rattus norvegicus cDNA clone UI-R-A0-ay-f-02-0-UI 3', mRNA sequence [AI385133]                                                          | AI385133     |
| <b>1.45</b>  | 2.73 | <b>Increase</b> | 2.50  | 0.02155472 | 0.3389 | ENSRNOT00000052065                                                                                              | PREDICTED: Rattus norvegicus similar to ribosomal protein S10 (LOC364977), mRNA [XM_344746]                                                                                      | XM_344746    |
| <b>-1.41</b> | 2.66 | <b>Decrease</b> | -2.50 | 0.02158464 | 0.3390 | Down syndrome critical region gene 1-like 1                                                                     | Rattus norvegicus Down syndrome critical region gene 1-like 1 (Dscr11), mRNA [NM_175578]                                                                                         | NM_175578    |
| <b>-1.23</b> | 2.34 | <b>Decrease</b> | -2.49 | 0.0217374  | 0.3397 | polymerase (DNA directed), alpha 2                                                                              | Rattus norvegicus polymerase (DNA directed), alpha 2 (Pola2), mRNA [NM_053480]                                                                                                   | NM_053480    |
| <b>1.02</b>  | 2.02 | <b>Increase</b> | 2.49  | 0.0217481  | 0.3397 | CD302 antigen                                                                                                   | Rattus norvegicus CD302 antigen (Cd302), mRNA [NM_001013916]                                                                                                                     | NM_001013916 |

|       |      |          |       |            |        |                                                       |                                                                                                                           |              |
|-------|------|----------|-------|------------|--------|-------------------------------------------------------|---------------------------------------------------------------------------------------------------------------------------|--------------|
| 1.63  | 3.10 | Increase | 2.49  | 0.02175304 | 0.3397 | CD44 antigen                                          | Rattus norvegicus CD44 antigen (Cd44), mRNA [NM_012924]                                                                   | NM_012924    |
| 1.07  | 2.10 | Increase | 2.49  | 0.02177022 | 0.3399 | RGD1561069_predicted                                  | PREDICTED: Rattus norvegicus similar to F-box only protein 31 (predicted) (RGD1561069_predicted), mRNA [XM_574248]        | XM_574248    |
| -1.65 | 3.13 | Decrease | -2.49 | 0.0220242  | 0.3410 | abhydrolase domain containing 1                       | Rattus norvegicus abhydrolase domain containing 1 (Abhd1), mRNA [NM_001008520]                                            | NM_001008520 |
| 1.37  | 2.59 | Increase | 2.48  | 0.02231967 | 0.3427 | proline arginine-rich end leucine-rich repeat protein | Rattus norvegicus proline arginine-rich end leucine-rich repeat protein (Prelp), mRNA [NM_053385]                         | NM_053385    |
| 2.49  | 5.61 | Increase | 2.47  | 0.02269923 | 0.3454 | acetylcholinesterase                                  | R.norvegicus mRNA for glycolipid-anchored form of acetylcholinesterase (HAcHE). [X70140]                                  | X70140       |
| 1.57  | 2.96 | Increase | 2.47  | 0.0229602  | 0.3475 | nuclear factor, interleukin 3 regulated               | Rattus norvegicus nuclear factor, interleukin 3 regulated (Nfil3), mRNA [NM_053727]                                       | NM_053727    |
| 1.28  | 2.43 | Increase | 2.47  | 0.02305132 | 0.3484 | AW535083                                              | AW535083 UI-R-C4-als-a-07-0-UI.s1 UI-R-C4 Rattus norvegicus cDNA clone UI-R-C4-als-a-07-0-UI 3', mRNA sequence [AW535083] | AW535083     |
| 1.28  | 2.43 | Increase | 2.47  | 0.02310719 | 0.3485 | AF216218                                              | AF216218 Rattus norvegicus orphanin FQ receptor gene (OFQR), complete cds, alternatively spliced [AF216218]               | AF216218     |
| 1.11  | 2.15 | Increase | 2.46  | 0.0232104  | 0.3492 | lactamase, beta (predicted)                           | PREDICTED: Rattus norvegicus lactamase, beta (predicted) (Lactb_predicted), mRNA [XM_217181]                              | XM_217181    |
| -1.21 | 2.32 | Decrease | -2.46 | 0.02337605 | 0.3495 | 5-azacytidine induced gene 1 (predicted)              | PREDICTED: Rattus norvegicus 5-azacytidine induced gene 1                                                                 | XM_340945    |

|              |      |                 |       |            |        |                                                              |                                                                                                                                                   |              |
|--------------|------|-----------------|-------|------------|--------|--------------------------------------------------------------|---------------------------------------------------------------------------------------------------------------------------------------------------|--------------|
|              |      |                 |       |            |        |                                                              | (predicted) (Azi1_predicted), mRNA [XM_340945]                                                                                                    |              |
| <b>-1.10</b> | 2.14 | <b>Decrease</b> | -2.46 | 0.02358261 | 0.3511 | FAD-dependent oxidoreductase domain containing 1 (predicted) | Rattus norvegicus hypothetical LOC315547 (LOC315547), mRNA [XM_235988]                                                                            | XM_235988    |
| <b>1.79</b>  | 3.45 | <b>Increase</b> | 2.45  | 0.02374693 | 0.3522 | BF564703                                                     | UI-R-BU0-amv-g-06-0-UI.r1 UI-R-BU0 Rattus norvegicus cDNA clone UI-R-BU0-amv-g-06-0-UI 5', mRNA sequence [BF564703]                               | BF564703     |
| <b>-1.69</b> | 3.23 | <b>Decrease</b> | -2.45 | 0.02409551 | 0.3538 | XM_341060                                                    | Rattus norvegicus similar to Williams-Beuren syndrome critical region protein 27 (LOC360794), mRNA [XM_341060]                                    | XM_341060    |
| <b>1.32</b>  | 2.49 | <b>Increase</b> | 2.45  | 0.02410141 | 0.3538 | junction adhesion molecule 2                                 | Rattus norvegicus junction adhesion molecule 2 (Jam2), mRNA [NM_001034004]                                                                        | NM_001034004 |
| <b>-1.01</b> | 2.01 | <b>Decrease</b> | -2.44 | 0.02416909 | 0.3539 | AW917678                                                     | AW917678 EST348982 Rat gene index, normalized rat, norvegicus, Bento Soares Rattus norvegicus cDNA clone RGIEG73 5' end, mRNA sequence [AW917678] | AW917678     |
| <b>-1.48</b> | 2.78 | <b>Decrease</b> | -2.44 | 0.02419229 | 0.3539 | POU domain, class 2, transcription factor 1                  | PREDICTED: Rattus norvegicus POU domain, class 2, transcription factor 1 (Pou2f1), mRNA [XM_001075635]                                            | XM_001075635 |
| <b>1.26</b>  | 2.39 | <b>Increase</b> | 2.44  | 0.02420531 | 0.3539 | SRY-box containing gene 21 (predicted)                       | PREDICTED: Rattus norvegicus SRY-box containing gene 21 (predicted) (Sox21_predicted), mRNA [XM_224521]                                           | XM_224521    |
| <b>-2.06</b> | 4.16 | <b>Decrease</b> | -2.44 | 0.02447062 | 0.3560 | AW143180                                                     | AW143180 EST293476 Normalized rat brain, Bento Soares Rattus sp. cDNA clone RGIBF05 5' end, mRNA sequence [AW143180]                              | AW143180     |

|              |      |          |       |            |        |                                                           |                                                                                                                 |              |
|--------------|------|----------|-------|------------|--------|-----------------------------------------------------------|-----------------------------------------------------------------------------------------------------------------|--------------|
| <b>-1.73</b> | 3.32 | Decrease | -2.44 | 0.02449439 | 0.3561 | growth differentiation factor 11                          | PREDICTED: Rattus norvegicus growth differentiation factor 11 (Gdf11), mRNA [XM_001071574]                      | XM_001071574 |
| <b>1.13</b>  | 2.19 | Increase | 2.43  | 0.0248293  | 0.3587 | coronin, actin binding protein 6                          | Rattus norvegicus coronin, actin binding protein 6 (Coro6), mRNA [NM_139115]                                    | NM_139115    |
| <b>-1.15</b> | 2.21 | Decrease | -2.43 | 0.02486483 | 0.3587 | CUG triplet repeat, RNA binding protein 2                 | Rattus norvegicus CUG triplet repeat, RNA binding protein 2 (Cugbp2), mRNA [NM_017197]                          | NM_017197    |
| <b>-2.43</b> | 5.40 | Decrease | -2.43 | 0.02486515 | 0.3587 | epsin 3                                                   | Rattus norvegicus epsin 3 (Epn3), mRNA [NM_001024791]                                                           | NM_001024791 |
| <b>1.40</b>  | 2.63 | Increase | 2.43  | 0.02498064 | 0.3597 | procollagen, type V, alpha 1                              | Rattus norvegicus procollagen, type V, alpha 1 (Col5a1), mRNA [NM_134452]                                       | NM_134452    |
| <b>1.43</b>  | 2.69 | Increase | 2.42  | 0.02522654 | 0.3615 | transcriptional co-activator with PDZ-binding motif (TA)Z | Rattus norvegicus transcriptional co-activator with PDZ-binding motif (TA)Z (MGC116096), mRNA [NM_001024869]    | NM_001024869 |
| <b>-1.94</b> | 3.84 | Decrease | -2.42 | 0.02534621 | 0.3621 | laminin, beta 3                                           | PREDICTED: Rattus norvegicus laminin, beta 3 (Lamb3), mRNA [XM_001069930]                                       | XM_001069930 |
| <b>1.10</b>  | 2.14 | Increase | 2.42  | 0.02550939 | 0.3626 | leucine rich repeat containing 33                         | Rattus norvegicus leucine rich repeat containing 33 (Lrrc33), mRNA [NM_001024995]                               | NM_001024995 |
| <b>-1.21</b> | 2.31 | Decrease | -2.42 | 0.02550979 | 0.3626 | tetraspanin 1                                             | Rattus norvegicus tetraspanin 1 (Tspan1), mRNA [NM_001004236]                                                   | NM_001004236 |
| <b>-1.33</b> | 2.51 | Decrease | -2.42 | 0.02561668 | 0.3632 | similar to ornithine decarboxylase-like protein           | Rattus norvegicus similar to ornithine decarboxylase-like protein (LOC366473), mRNA [NM_001014261]              | NM_001014261 |
| <b>1.02</b>  | 2.03 | Increase | 2.42  | 0.025695   | 0.3636 | ELK3, member of ETS oncogene family (predicted)           | PREDICTED: Rattus norvegicus ELK3, member of ETS oncogene family (predicted) (Elk3_predicted), mRNA [XM_343198] | XM_343198    |

|              |      |                 |       |            |        |                                                |                                                                                                                        |              |
|--------------|------|-----------------|-------|------------|--------|------------------------------------------------|------------------------------------------------------------------------------------------------------------------------|--------------|
| <b>1.22</b>  | 2.33 | <b>Increase</b> | 2.42  | 0.02569629 | 0.3636 | AW915440                                       | AW915440 EST346744 Normalized rat embryo, Bento Soares Rattus sp. cDNA clone RGICV43 5' end, mRNA sequence [AW915440]  | AW915440     |
| <b>-1.39</b> | 2.61 | <b>Decrease</b> | -2.41 | 0.02581236 | 0.3639 | laminin, beta 3                                | PREDICTED: Rattus norvegicus laminin, beta 3 (Lamb3), mRNA [XM_223087]                                                 | XM_223087    |
| <b>1.05</b>  | 2.07 | <b>Increase</b> | 2.41  | 0.02584516 | 0.3639 | TC538123                                       | Q7Z5L9 (Q7Z5L9) Interferon regulatory factor-2 binding protein 2A, partial (64%) [TC538123]                            |              |
| <b>-1.30</b> | 2.47 | <b>Decrease</b> | -2.41 | 0.02602022 | 0.3639 | zinc fingers and homeoboxes 3                  | PREDICTED: Rattus norvegicus zinc fingers and homeoboxes 3, transcript variant 2 (Zhx3), mRNA [XM_230811]              | XM_230811    |
| <b>1.30</b>  | 2.47 | <b>Increase</b> | 2.41  | 0.02609978 | 0.3639 | AI231472                                       | AI231472 EST228160 Normalized rat embryo, Bento Soares Rattus sp. cDNA clone REMDK57 3' end, mRNA sequence [AI231472]  | AI231472     |
| <b>-1.23</b> | 2.34 | <b>Decrease</b> | -2.41 | 0.02620741 | 0.3646 | similar to ZFP36L3 (predicted)                 | PREDICTED: Rattus norvegicus similar to ZFP36L3 (predicted) (RGD1559581_predicted), mRNA [XM_228661]                   | XM_228661    |
| <b>-1.94</b> | 3.83 | <b>Decrease</b> | -2.40 | 0.02640348 | 0.3649 | Syncrip                                        | PREDICTED: Rattus norvegicus synaptotagmin binding, cytoplasmic RNA interacting protein (Syncrip), mRNA [XM_001065902] | XM_001065902 |
| <b>1.05</b>  | 2.07 | <b>Increase</b> | 2.40  | 0.02643124 | 0.3649 | XM_346356                                      | Rattus norvegicus similar to 60S RIBOSOMAL PROTEIN L7 (LOC367933), mRNA [XM_346356]                                    | XM_346356    |
| <b>-1.11</b> | 2.16 | <b>Decrease</b> | -2.40 | 0.02645783 | 0.3650 | similar to Myosin-18B (Myosin XVIIIb)          | Rattus norvegicus similar to myosin-like protein (LOC304551), mRNA [XM_239684]                                         | XM_239684    |
| <b>1.98</b>  | 3.94 | <b>Increase</b> | 2.40  | 0.02652971 | 0.3655 | arachidonate 5-lipoxygenase activating protein | Rattus norvegicus arachidonate 5-lipoxygenase activating protein (Alox5ap), mRNA [NM_017260]                           | NM_017260    |

|              |      |                 |       |            |        |                                            |                                                                                                                         |              |
|--------------|------|-----------------|-------|------------|--------|--------------------------------------------|-------------------------------------------------------------------------------------------------------------------------|--------------|
| <b>1.70</b>  | 3.24 | <b>Increase</b> | 2.40  | 0.02658955 | 0.3658 | myelin-associated glycoprotein             | Rattus norvegicus myelin-associated glycoprotein (Mag), mRNA [NM_017190]                                                | NM_017190    |
| <b>1.49</b>  | 2.81 | <b>Increase</b> | 2.40  | 0.02668094 | 0.3663 | similar to Slit-like 2                     | PREDICTED: Rattus norvegicus similar to Slit-like 2 (LOC679921), mRNA [XM_001055204]                                    | XM_001055204 |
| <b>1.30</b>  | 2.46 | <b>Increase</b> | 2.39  | 0.02681878 | 0.3668 | proline-rich proteoglycan 2                | Rattus norvegicus proline-rich proteoglycan 2 (Prpg2), mRNA [NM_172065]                                                 | NM_172065    |
| <b>-2.14</b> | 4.40 | <b>Decrease</b> | -2.39 | 0.0269002  | 0.3674 | CD6 antigen                                | Rattus norvegicus CD6 antigen (Cd6), mRNA [NM_175577]                                                                   | NM_175577    |
| <b>-1.68</b> | 3.20 | <b>Decrease</b> | -2.39 | 0.02700562 | 0.3676 | pellino homolog 3 (Drosophila) (predicted) | PREDICTED: Rattus norvegicus pellino homolog 3 (Drosophila) (predicted) (Peli3_predicted), mRNA [XM_219692]             | XM_219692    |
| <b>1.38</b>  | 2.60 | <b>Increase</b> | 2.38  | 0.02744446 | 0.3694 | AW144408                                   | AW144408 EST294704 Normalized rat ovary, Bento Soares Rattus sp. cDNA clone RGICR81 5' end, mRNA sequence [AW144408]    | AW144408     |
| <b>2.12</b>  | 4.35 | <b>Increase</b> | 2.38  | 0.02745857 | 0.3694 | retinol binding protein 1, cellular        | Rattus norvegicus retinol binding protein 1, cellular (Rbp1), mRNA [NM_012733]                                          | NM_012733    |
| <b>-1.10</b> | 2.15 | <b>Decrease</b> | -2.38 | 0.02748495 | 0.3694 | TC553545                                   | Q961E9 (Q961E9) GH28016p, partial (4%) [TC553545]                                                                       |              |
| <b>-1.15</b> | 2.22 | <b>Decrease</b> | -2.38 | 0.02758548 | 0.3696 | Vcl_predicted                              | PREDICTED: Rattus norvegicus vinculin (predicted) (Vcl_predicted), mRNA [XM_223781]                                     | XM_223781    |
| <b>1.31</b>  | 2.48 | <b>Increase</b> | 2.38  | 0.0279174  | 0.3714 | similar to RIKEN cDNA 1810012H11           | Rattus norvegicus similar to RIKEN cDNA 1810012H11 (LOC298606), mRNA [NM_001013936]                                     | NM_001013936 |
| <b>-1.34</b> | 2.53 | <b>Decrease</b> | -2.37 | 0.02798333 | 0.3719 | CA507012                                   | CA507012 UI-R-FS1-cqd-e-23-0-UI.s1 NCI_CGAP_FS1 Rattus norvegicus cDNA clone IMAGE:7361377 3', mRNA sequence [CA507012] | CA507012     |



|              |      |          |       |            |        |                                                                            |                                                                                                                                                   |              |
|--------------|------|----------|-------|------------|--------|----------------------------------------------------------------------------|---------------------------------------------------------------------------------------------------------------------------------------------------|--------------|
| <b>-1.14</b> | 2.20 | Decrease | -2.37 | 0.02808914 | 0.3719 | EGF-like-domain, multiple 4                                                | PREDICTED: Rattus norvegicus EGF-like-domain, multiple 4 (Egfl4), mRNA [XM_341803]                                                                | XM_341803    |
| <b>-1.75</b> | 3.35 | Decrease | -2.37 | 0.02846067 | 0.3735 | AW918794                                                                   | AW918794 EST350098 Rat gene index, normalized rat, norvegicus, Bento Soares Rattus norvegicus cDNA clone RGIEY31 5' end, mRNA sequence [AW918794] | AW918794     |
| <b>-1.18</b> | 2.27 | Decrease | -2.36 | 0.0285873  | 0.3743 | AI555010                                                                   | AI555010 UI-R-C2p-qu-h-04-0-UI.s1 UI-R-C2p Rattus norvegicus cDNA clone UI-R-C2p-qu-h-04-0-UI 3', mRNA sequence [AI555010]                        | AI555010     |
| <b>-1.12</b> | 2.17 | Decrease | -2.36 | 0.02866495 | 0.3745 | Rab6 interacting protein 1 (predicted)                                     | PREDICTED: Rattus norvegicus Rab6 interacting protein 1 (predicted) (Rab6ip1_predicted), mRNA [XM_219270]                                         | XM_219270    |
| <b>1.63</b>  | 3.10 | Increase | 2.36  | 0.0288298  | 0.3745 | WD repeat and SOCS box-containing 1                                        | Rattus norvegicus WD repeat and SOCS box-containing 1 (Wsb1), transcript variant 2, mRNA [NM_001025664]                                           | NM_001025664 |
| <b>-1.03</b> | 2.04 | Decrease | -2.36 | 0.02885336 | 0.3745 | U08214                                                                     | RSU08214 Rattus sp. DNA binding protein (URE-B1) mRNA, complete cds [U08214]                                                                      | U08214       |
| <b>1.46</b>  | 2.75 | Increase | 2.36  | 0.02897611 | 0.3748 | DV722215                                                                   | RVL13603 Wackym-Soares normalized rat vestibular cDNA library Rattus norvegicus cDNA 5', mRNA sequence [DV722215]                                 | DV722215     |
| <b>1.00</b>  | 2.00 | Increase | 2.35  | 0.02929268 | 0.3769 | similar to CD69 antigen (p60, early T-cell activation antigen) (predicted) | PREDICTED: Rattus norvegicus similar to CD69 antigen (p60, early T-cell activation antigen) (predicted) (RGD1565373_predicted), mRNA [XM_231622]  | XM_231622    |

|              |      |          |       |            |        |                              |                                                                                                                                                   |              |
|--------------|------|----------|-------|------------|--------|------------------------------|---------------------------------------------------------------------------------------------------------------------------------------------------|--------------|
| <b>-1.58</b> | 2.99 | Decrease | -2.35 | 0.02940474 | 0.3769 | valyl-tRNA synthetase 2      | PREDICTED: Rattus norvegicus valyl-tRNA synthetase 2 (Vars2), mRNA [XM_001076616]                                                                 | XM_001076616 |
| <b>-1.36</b> | 2.56 | Decrease | -2.35 | 0.02945723 | 0.3769 | interleukin 13               | Rattus norvegicus interleukin 13 (Il13), mRNA [NM_053828]                                                                                         | NM_053828    |
| <b>-2.06</b> | 4.16 | Decrease | -2.35 | 0.02949021 | 0.3769 | titin                        | RNU89530 Rattus norvegicus titin protein homolog mRNA, partial cds [U89530]                                                                       | U89530       |
| <b>-1.12</b> | 2.18 | Decrease | -2.35 | 0.02971844 | 0.3781 | AW144299                     | AW144299 EST294595 Normalized rat ovary, Bento Soares Rattus sp. cDNA clone RGICP57 5' end, mRNA sequence [AW144299]                              | AW144299     |
| <b>-1.39</b> | 2.62 | Decrease | -2.34 | 0.02987516 | 0.3785 | myosin, heavy polypeptide 14 | PREDICTED: Rattus norvegicus myosin, heavy polypeptide 14 (Myh14), mRNA [XM_218617]                                                               | XM_218617    |
| <b>2.34</b>  | 5.07 | Increase | 2.34  | 0.02988069 | 0.3785 | XM_345191                    | Rattus norvegicus similar to ribosomal protein L30 (LOC365749), mRNA [XM_345191]                                                                  | XM_345191    |
| <b>1.15</b>  | 2.23 | Increase | 2.34  | 0.02993471 | 0.3785 | F11 receptor                 | Rattus norvegicus F11 receptor (F11r), mRNA [NM_053796]                                                                                           | NM_053796    |
| <b>-1.13</b> | 2.18 | Decrease | -2.34 | 0.02999332 | 0.3790 | XM_346113                    | PREDICTED: Rattus norvegicus similar to Down syndrome cell adhesion molecule (LOC367375), mRNA [XM_346113]                                        | XM_346113    |
| <b>-1.58</b> | 2.98 | Decrease | -2.34 | 0.03023716 | 0.3802 | AW918794                     | AW918794 EST350098 Rat gene index, normalized rat, norvegicus, Bento Soares Rattus norvegicus cDNA clone RGIEY31 5' end, mRNA sequence [AW918794] | AW918794     |
| <b>-1.09</b> | 2.12 | Decrease | -2.34 | 0.03024991 | 0.3802 | Sbno1                        | PREDICTED: Rattus norvegicus sno, strawberry notch homolog 1 (Drosophila) (Sbno1), mRNA [XM_222152]                                               | XM_222152    |

|              |      |                 |       |            |        |                                                |                                                                                                                           |              |
|--------------|------|-----------------|-------|------------|--------|------------------------------------------------|---------------------------------------------------------------------------------------------------------------------------|--------------|
| <b>1.21</b>  | 2.32 | <b>Increase</b> | 2.33  | 0.0305071  | 0.3815 | neuroblastoma, suppression of tumorigenicity 1 | Rattus norvegicus neuroblastoma, suppression of tumorigenicity 1 (Nbl1), mRNA [NM_031609]                                 | NM_031609    |
| <b>1.26</b>  | 2.39 | <b>Increase</b> | 2.33  | 0.03051087 | 0.3815 | transmembrane protein 104 (predicted)          | PREDICTED: Rattus norvegicus transmembrane protein 104 (predicted) (Tmem104_predicted), mRNA [XM_221104]                  | XM_221104    |
| <b>-1.69</b> | 3.23 | <b>Decrease</b> | -2.33 | 0.03053483 | 0.3817 | homer homolog 2 (Drosophila)                   | Rattus norvegicus homer homolog 2 (Drosophila) (Homer2), mRNA [NM_053309]                                                 | NM_053309    |
| <b>1.18</b>  | 2.26 | <b>Increase</b> | 2.33  | 0.03078096 | 0.3835 | XM_217340                                      | Rattus norvegicus similar to hypothetical protein MGC19067 (LOC301239), mRNA [XM_217340]                                  | XM_217340    |
| <b>1.00</b>  | 2.00 | <b>Increase</b> | 2.33  | 0.03092873 | 0.3844 | gap junction membrane channel protein alpha 7  | PREDICTED: Rattus norvegicus gap junction membrane channel protein alpha 7 (Gja7), mRNA [XM_001081521]                    | XM_001081521 |
| <b>1.70</b>  | 3.24 | <b>Increase</b> | 2.33  | 0.03094604 | 0.3844 | paired related homeobox 2 (predicted)          | PREDICTED: Rattus norvegicus paired related homeobox 2 (predicted) (Prrx2_predicted), mRNA [XM_238327]                    | XM_238327    |
| <b>2.49</b>  | 5.64 | <b>Increase</b> | 2.33  | 0.03099063 | 0.3846 | AW533905                                       | AW533905 UI-R-C4-alr-b-02-0-UI.s1 UI-R-C4 Rattus norvegicus cDNA clone UI-R-C4-alr-b-02-0-UI 3', mRNA sequence [AW533905] | AW533905     |
| <b>1.12</b>  | 2.18 | <b>Increase</b> | 2.32  | 0.03123406 | 0.3854 | parathymsin                                    | Rattus norvegicus parathymsin (Ptms), mRNA [NM_031975]                                                                    | NM_031975    |
| <b>1.11</b>  | 2.16 | <b>Increase</b> | 2.32  | 0.03159451 | 0.3869 | BF555800                                       | BF555800 UI-R-A1-ej-d-01-0-UI.r1 UI-R-A1 Rattus norvegicus cDNA clone UI-R-A1-ej-d-01-0-UI 5', mRNA sequence [BF555800]   | BF555800     |
| <b>1.03</b>  | 2.04 | <b>Increase</b> | 2.31  | 0.03169803 | 0.3876 | RT1 class II, locus Da                         | Rattus norvegicus RT1 class II, locus Da (RT1-Da), mRNA [NM_001008847]                                                    | NM_001008847 |

|              |      |                 |       |            |        |                                                           |                                                                                                                                                   |           |
|--------------|------|-----------------|-------|------------|--------|-----------------------------------------------------------|---------------------------------------------------------------------------------------------------------------------------------------------------|-----------|
| <b>1.49</b>  | 2.82 | <b>Increase</b> | 2.30  | 0.03236966 | 0.3912 | mast cell protease 6                                      | Rattus norvegicus mast cell protease 6 (Mcpt6), mRNA [NM_019180]                                                                                  | NM_019180 |
| <b>1.25</b>  | 2.39 | <b>Increase</b> | 2.30  | 0.03262557 | 0.3923 | tissue factor pathway inhibitor                           | Rattus norvegicus tissue factor pathway inhibitor (Tfpi), mRNA [NM_017200]                                                                        | NM_017200 |
| <b>1.06</b>  | 2.08 | <b>Increase</b> | 2.30  | 0.03263429 | 0.3923 | lipocalin 7                                               | Rattus norvegicus lipocalin 7 (Lcn7), mRNA [NM_053582]                                                                                            | NM_053582 |
| <b>1.36</b>  | 2.56 | <b>Increase</b> | 2.30  | 0.03284202 | 0.3931 | BI285576                                                  | BI285576 UI-R-CW0s-ccb-g-06-0-UI.s1 UI-R-CW0s Rattus norvegicus cDNA clone UI-R-CW0s-ccb-g-06-0-UI 3', mRNA sequence [BI285576]                   | BI285576  |
| <b>1.13</b>  | 2.18 | <b>Increase</b> | 2.30  | 0.03293153 | 0.3934 | AW917911                                                  | AW917911 EST349215 Rat gene index, normalized rat, norvegicus, Bento Soares Rattus norvegicus cDNA clone RGIEK03 5' end, mRNA sequence [AW917911] | AW917911  |
| <b>-1.12</b> | 2.17 | <b>Decrease</b> | -2.29 | 0.03310292 | 0.3942 | CO398332                                                  | AGENCOURT_27827173 NIH_MGC_252 Rattus norvegicus cDNA clone IMAGE:7308022 5', mRNA sequence [CO398332]                                            | CO398332  |
| <b>-1.12</b> | 2.18 | <b>Decrease</b> | -2.29 | 0.03312584 | 0.3942 | similar to Retinoic acid induced 2 (predicted)            | PREDICTED: Rattus norvegicus similar to Retinoic acid induced 2 (predicted) (RGD1560139_predicted), mRNA [XM_576959]                              | XM_576959 |
| <b>-1.04</b> | 2.05 | <b>Decrease</b> | -2.29 | 0.03340342 | 0.3946 | protein phosphatase 1B, magnesium dependent, beta isoform | Rattus norvegicus protein phosphatase 1B, magnesium dependent, beta isoform (Ppm1b), mRNA [NM_033096]                                             | NM_033096 |
| <b>-1.13</b> | 2.19 | <b>Decrease</b> | -2.29 | 0.03347089 | 0.3949 | nuclear factor I/B                                        | PREDICTED: Rattus norvegicus nuclear factor I/B (Nfib), mRNA [XM_342854]                                                                          | XM_342854 |

|              |      |                 |       |            |        |                                              |                                                                                                                              |              |
|--------------|------|-----------------|-------|------------|--------|----------------------------------------------|------------------------------------------------------------------------------------------------------------------------------|--------------|
| <b>1.30</b>  | 2.46 | <b>Increase</b> | 2.29  | 0.03352783 | 0.3952 | glutamate receptor, metabotropic 2           | PREDICTED: Rattus norvegicus glutamate receptor, metabotropic 2 (Grm2), mRNA [XM_343470]                                     | XM_343470    |
| <b>1.00</b>  | 2.00 | <b>Increase</b> | 2.28  | 0.03369648 | 0.3959 | AI045508                                     | AI045508 UI-R-C1-kj-g-08-0-UI.s1 UI-R-C1 Rattus norvegicus cDNA clone UI-R-C1-kj-g-08-0-UI 3', mRNA sequence [AI045508]      | AI045508     |
| <b>1.01</b>  | 2.01 | <b>Increase</b> | 2.28  | 0.0337376  | 0.3959 | BF417776                                     | BF417776 UI-R-CN0-blx-a-09-0-UI.s1 UI-R-CN0 Rattus norvegicus cDNA clone UI-R-CN0-blx-a-09-0-UI 3', mRNA sequence [BF417776] | BF417776     |
| <b>-1.11</b> | 2.16 | <b>Decrease</b> | -2.28 | 0.0337597  | 0.3959 | ATPase, Ca++ transporting, plasma membrane 3 | PREDICTED: Rattus norvegicus ATPase, Ca++ transporting, plasma membrane 3 (Atp2b3), mRNA [XM_343839]                         | XM_343839    |
| <b>1.83</b>  | 3.57 | <b>Increase</b> | 2.28  | 0.03376864 | 0.3959 | Jun D proto-oncogene                         | Rattus norvegicus Jun D proto-oncogene (Jund), mRNA [NM_138875]                                                              | NM_138875    |
| <b>-1.31</b> | 2.47 | <b>Decrease</b> | -2.28 | 0.03387811 | 0.3964 | integrin alpha 7                             | Rattus norvegicus integrin alpha 7 (Itga7), mRNA [NM_030842]                                                                 | NM_030842    |
| <b>1.09</b>  | 2.14 | <b>Increase</b> | 2.28  | 0.03392    | 0.3967 | similar to nuclear localized factor 2        | PREDICTED: Rattus norvegicus similar to nuclear localized factor 2 (LOC501015), mRNA [XM_001056441]                          | XM_001056441 |
| <b>1.37</b>  | 2.59 | <b>Increase</b> | 2.28  | 0.03393656 | 0.3967 | lysyl oxidase-like 1                         | Rattus norvegicus lysyl oxidase-like 1 (Loxl1), mRNA [NM_001012125]                                                          | NM_001012125 |
| <b>1.51</b>  | 2.84 | <b>Increase</b> | 2.28  | 0.03395108 | 0.3967 | HtrA serine peptidase 3 (predicted)          | PREDICTED: Rattus norvegicus HtrA serine peptidase 3 (predicted) (Htra3_predicted), mRNA [XM_341237]                         | XM_341237    |
| <b>-1.58</b> | 2.99 | <b>Decrease</b> | -2.28 | 0.03415916 | 0.3982 | Ttn                                          | PREDICTED: Rattus norvegicus titin (Ttn), mRNA [XM_001065955]                                                                | XM_001065955 |
| <b>-1.02</b> | 2.02 | <b>Decrease</b> | -2.28 | 0.03418866 | 0.3983 | AI411407                                     | AI411407 EST239701 Normalized rat kidney, Bento Soares Rattus sp.                                                            | AI411407     |

|              |      |                 |       |            |        |                                                                                          |                                                                                                                                                                |              |
|--------------|------|-----------------|-------|------------|--------|------------------------------------------------------------------------------------------|----------------------------------------------------------------------------------------------------------------------------------------------------------------|--------------|
|              |      |                 |       |            |        |                                                                                          | cDNA clone RKIES92 3' end, mRNA sequence [AI411407]                                                                                                            |              |
| <b>1.39</b>  | 2.63 | <b>Increase</b> | 2.28  | 0.03431443 | 0.3988 | TC518066                                                                                 | Q9ERK2 (Q9ERK2) Neprilysin-like peptidase gamma, partial (3%) [TC518066]                                                                                       |              |
| <b>1.09</b>  | 2.13 | <b>Increase</b> | 2.28  | 0.03434051 | 0.3990 | quinolinate phosphoribosyltransferase                                                    | Rattus norvegicus quinolinate phosphoribosyltransferase (Qprt), mRNA [NM_001009646]                                                                            | NM_001009646 |
| <b>1.03</b>  | 2.04 | <b>Increase</b> | 2.27  | 0.03443671 | 0.3993 | hsp70-interacting protein                                                                | Rattus norvegicus hsp70-interacting protein (Hspbp1), mRNA [NM_139261]                                                                                         | NM_139261    |
| <b>1.21</b>  | 2.31 | <b>Increase</b> | 2.27  | 0.03451459 | 0.3993 | farnesyltransferase, CAAX box, beta                                                      | Rattus norvegicus farnesyltransferase, CAAX box, beta (Fntb), mRNA [NM_172034]                                                                                 | NM_172034    |
| <b>1.50</b>  | 2.83 | <b>Increase</b> | 2.27  | 0.03456926 | 0.3995 | A kinase (PRKA) anchor protein (gravin) 12                                               | Rattus norvegicus A kinase (PRKA) anchor protein (gravin) 12 (Akap12), transcript variant 1, mRNA [NM_057103]                                                  | NM_057103    |
| <b>-1.19</b> | 2.29 | <b>Decrease</b> | -2.27 | 0.03475208 | 0.3999 | similar to RIKEN cDNA B630019K06 (predicted)                                             | Rattus norvegicus similar to hypothetical protein MGC31104 (LOC363449), mRNA [XM_343770]                                                                       | XM_343770    |
| <b>1.33</b>  | 2.51 | <b>Increase</b> | 2.27  | 0.03479267 | 0.3999 | XM_227418                                                                                | Rattus norvegicus similar to hypothetical protein FLJ32934 (LOC295247), mRNA [XM_227418]                                                                       | XM_227418    |
| <b>1.54</b>  | 2.91 | <b>Increase</b> | 2.27  | 0.03480154 | 0.3999 | CO386194                                                                                 | AGENCOURT_26627340 NIH_MGC_253 Rattus norvegicus cDNA clone IMAGE:7302287 5', mRNA sequence [CO386194]                                                         | CO386194     |
| <b>-1.53</b> | 2.90 | <b>Decrease</b> | -2.26 | 0.03513186 | 0.4012 | similar to Glutathione S-transferase 8 (GST 8-8) (Chain 8) (GST class-alpha) (predicted) | PREDICTED: Rattus norvegicus similar to Glutathione S-transferase 8 (GST 8-8) (Chain 8) (GST class-alpha) (predicted) (RGD1564906_predicted), mRNA [XM_576039] | XM_576039    |

|              |      |                 |       |            |        |                                                                   |                                                                                                                              |              |
|--------------|------|-----------------|-------|------------|--------|-------------------------------------------------------------------|------------------------------------------------------------------------------------------------------------------------------|--------------|
| <b>1.04</b>  | 2.05 | <b>Increase</b> | 2.26  | 0.0353762  | 0.4020 | similar to Laminin alpha-4 chain precursor (predicted)            | PREDICTED: Rattus norvegicus similar to Laminin alpha-4 chain precursor (predicted) (RGD1560062_predicted), mRNA [XM_228209] | XM_228209    |
| <b>-1.30</b> | 2.46 | <b>Decrease</b> | -2.26 | 0.03553779 | 0.4026 | similar to hypothetical basic protein I-19 (predicted)            | PREDICTED: Rattus norvegicus similar to hypothetical basic protein I-19 (predicted) (RGD1305157_predicted), mRNA [XM_236724] | XM_236724    |
| <b>-1.73</b> | 3.32 | <b>Decrease</b> | -2.26 | 0.03575581 | 0.4034 | glycine-, glutamate-, thienylcyclohexylpiperidine-binding protein | PREDICTED: Rattus norvegicus glycine-, glutamate-, thienylcyclohexylpiperidine-binding protein (LOC246295), mRNA [XM_575968] | XM_575968    |
| <b>-2.22</b> | 4.66 | <b>Decrease</b> | -2.25 | 0.03601868 | 0.4047 | BC099186                                                          | Rattus norvegicus cDNA clone MGC:116357 IMAGE:7383333, complete cds. [BC099186]                                              | BC099186     |
| <b>1.32</b>  | 2.49 | <b>Increase</b> | 2.25  | 0.03619798 | 0.4051 | phosphatase, orphan 1 (predicted)                                 | PREDICTED: Rattus norvegicus phosphatase, orphan 1 (predicted) (Phospho1_predicted), mRNA [XM_220877]                        | XM_220877    |
| <b>1.93</b>  | 3.82 | <b>Increase</b> | 2.25  | 0.03638548 | 0.4059 | deoxyribonuclease II                                              | Rattus norvegicus deoxyribonuclease II (Dnase2), mRNA [NM_138539]                                                            | NM_138539    |
| <b>2.60</b>  | 6.08 | <b>Increase</b> | 2.25  | 0.03647912 | 0.4061 | complement component 1, q subcomponent, gamma polypeptide         | Rattus norvegicus complement component 1, q subcomponent, gamma polypeptide (C1qg), mRNA [NM_001008524]                      | NM_001008524 |
| <b>1.09</b>  | 2.13 | <b>Increase</b> | 2.25  | 0.0364859  | 0.4061 | AW142493                                                          | AW142493 EST292745 Normalized rat embryo, Bento Soares Rattus sp. cDNA clone RGIAN21 5' end, mRNA sequence [AW142493]        | AW142493     |

|              |      |                 |       |            |        |                                                             |                                                                                                                              |              |
|--------------|------|-----------------|-------|------------|--------|-------------------------------------------------------------|------------------------------------------------------------------------------------------------------------------------------|--------------|
| <b>1.21</b>  | 2.32 | <b>Increase</b> | 2.25  | 0.03652906 | 0.4061 | adipocyte-specific adhesion molecule                        | Rattus norvegicus adipocyte-specific adhesion molecule (Asam), mRNA [NM_173154]                                              | NM_173154    |
| <b>1.66</b>  | 3.15 | <b>Increase</b> | 2.24  | 0.03669018 | 0.4064 | protein C receptor, endothelial                             | Rattus norvegicus protein C receptor, endothelial (Procr), mRNA [NM_001025733]                                               | NM_001025733 |
| <b>-1.55</b> | 2.94 | <b>Decrease</b> | -2.24 | 0.03678111 | 0.4064 | XM_234810                                                   | Rattus norvegicus similar to GLUTATHIONE S-TRANSFERASE 8 (GST 8-8) (CHAIN 8) (GST CLASS-ALPHA) (LOC314570), mRNA [XM_234810] | XM_234810    |
| <b>-1.21</b> | 2.32 | <b>Decrease</b> | -2.24 | 0.03683957 | 0.4065 | N-myc downstream regulated gene 4                           | Rattus norvegicus N-myc downstream regulated gene 4 (Ndr4), mRNA [NM_031967]                                                 | NM_031967    |
| <b>-1.42</b> | 2.67 | <b>Decrease</b> | -2.24 | 0.03690091 | 0.4066 | similar to KIAA0368 (predicted)                             | Rattus norvegicus similar to KIAA0368 (LOC313196), mRNA [XM_232937]                                                          | XM_232937    |
| <b>1.70</b>  | 3.24 | <b>Increase</b> | 2.24  | 0.03719753 | 0.4088 | similar to RIKEN cDNA 1300017J02                            | PREDICTED: Rattus norvegicus similar to RIKEN cDNA 1300017J02 (RGD1310507), mRNA [XM_236574]                                 | XM_236574    |
| <b>1.04</b>  | 2.06 | <b>Increase</b> | 2.24  | 0.03721769 | 0.4088 | reticulon 4 receptor-like 2                                 | Rattus norvegicus reticulon 4 receptor-like 2 (Rtn4rl2), mRNA [NM_181380]                                                    | NM_181380    |
| <b>-1.17</b> | 2.25 | <b>Decrease</b> | -2.23 | 0.03764038 | 0.4102 | Mapk7                                                       | Rattus norvegicus mitogen-activated protein kinase 7 (Mapk7), mRNA [XM_340813]                                               | XM_340813    |
| <b>2.17</b>  | 4.50 | <b>Increase</b> | 2.23  | 0.03804436 | 0.4123 | LRRGT00154                                                  | PREDICTED: Rattus norvegicus LRRGT00154 (LOC499544), mRNA [XM_574867]                                                        | XM_574867    |
| <b>1.65</b>  | 3.15 | <b>Increase</b> | 2.22  | 0.03812488 | 0.4126 | chymase 1, mast cell                                        | Rattus norvegicus chymase 1, mast cell (Cma1), mRNA [NM_013092]                                                              | NM_013092    |
| <b>-1.38</b> | 2.61 | <b>Decrease</b> | -2.22 | 0.03837913 | 0.4131 | solute carrier family 27 (fatty acid transporter), member 1 | Rattus norvegicus solute carrier family 27 (fatty acid transporter),                                                         | NM_053580    |



|              |      |                 |       |            |        |                                                                                                        |                                                                                                                                                                                      |              |
|--------------|------|-----------------|-------|------------|--------|--------------------------------------------------------------------------------------------------------|--------------------------------------------------------------------------------------------------------------------------------------------------------------------------------------|--------------|
|              |      |                 |       |            |        |                                                                                                        | member 1 (Slc27a1), mRNA [NM_053580]                                                                                                                                                 |              |
| <b>-2.42</b> | 5.36 | <b>Decrease</b> | -2.22 | 0.03847613 | 0.4133 | cholinergic receptor, nicotinic, alpha polypeptide 7                                                   | Rattus norvegicus cholinergic receptor, nicotinic, alpha polypeptide 7 (Chrna7), mRNA [NM_012832]                                                                                    | NM_012832    |
| <b>-1.33</b> | 2.51 | <b>Decrease</b> | -2.22 | 0.0385194  | 0.4134 | kinesin family member 21A (predicted)                                                                  | PREDICTED: Rattus norvegicus kinesin family member 21A (predicted) (Kif21a_predicted), mRNA [XM_001056804]                                                                           | XM_001056804 |
| <b>1.26</b>  | 2.40 | <b>Increase</b> | 2.21  | 0.03920549 | 0.4170 | serine/threonine kinase 25 (STE20 homolog, yeast)                                                      | Rattus norvegicus serine/threonine kinase 25 (STE20 homolog, yeast) (Stk25), mRNA [NM_184049]                                                                                        | NM_184049    |
| <b>-1.10</b> | 2.15 | <b>Decrease</b> | -2.21 | 0.03945026 | 0.4175 | carbonic anhydrase 1 (predicted)                                                                       | PREDICTED: Rattus norvegicus carbonic anhydrase 1 (predicted) (Car1_predicted), mRNA [XM_226922]                                                                                     | XM_226922    |
| <b>-1.18</b> | 2.26 | <b>Decrease</b> | -2.21 | 0.03949196 | 0.4175 | similar to Guanine nucleotide-binding protein G(T) gamma-T1 subunit precursor (Transducin gamma chain) | AW533257 UI-R-BU0-ana-f-11-0-UI.s1 UI-R-BU0 Rattus norvegicus cDNA clone UI-R-BU0-ana-f-11-0-UI 3', mRNA sequence [AW533257]                                                         | AW533257     |
| <b>-2.38</b> | 5.19 | <b>Decrease</b> | -2.20 | 0.03974168 | 0.4189 | BF281791                                                                                               | BF281791 EST446382 Rat Gene Index, normalized rat, Rattus norvegicus cDNA Rattus norvegicus cDNA clone RGIBA05 similar to alpha cardiac myosin heavy chain, mRNA sequence [BF281791] | BF281791     |
| <b>-1.65</b> | 3.15 | <b>Decrease</b> | -2.20 | 0.03981819 | 0.4193 | cell division cycle 25 homolog A (S. cerevisiae)                                                       | Rattus norvegicus cell division cycle 25 homolog A (S. cerevisiae) (Cdc25a), mRNA [NM_133571]                                                                                        | NM_133571    |
| <b>1.15</b>  | 2.22 | <b>Increase</b> | 2.20  | 0.04002754 | 0.4203 | zinc finger, FYVE domain containing 1 (predicted)                                                      | PREDICTED: Rattus norvegicus zinc finger, FYVE domain containing 1 (predicted) (Zfyve1_predicted), mRNA [XM_216762]                                                                  | XM_216762    |

|              |      |                 |       |            |        |                                                     |                                                                                                                    |              |
|--------------|------|-----------------|-------|------------|--------|-----------------------------------------------------|--------------------------------------------------------------------------------------------------------------------|--------------|
| <b>1.29</b>  | 2.44 | <b>Increase</b> | 2.19  | 0.0405062  | 0.4222 | similar to hypothetical protein FLJ21827            | Rattus norvegicus similar to hypothetical protein FLJ21827 (RGD1307682), mRNA [NM_001024760]                       | NM_001024760 |
| <b>-1.01</b> | 2.01 | <b>Decrease</b> | -2.19 | 0.04092458 | 0.4247 | BG664520                                            | BG664520 DRABEH09 Rat DRG Library Rattus norvegicus cDNA clone DRABEH09 5', mRNA sequence [BG664520]               | BG664520     |
| <b>1.74</b>  | 3.33 | <b>Increase</b> | 2.19  | 0.04093541 | 0.4247 | XM_227913                                           | Rattus norvegicus similar to RIKEN cDNA 4930580F03 (LOC294168), mRNA [XM_227913]                                   | XM_227913    |
| <b>-1.92</b> | 3.79 | <b>Decrease</b> | -2.19 | 0.04105345 | 0.4248 | secreted phosphoprotein 1                           | Rattus norvegicus secreted phosphoprotein 1 (Spp1), mRNA [NM_012881]                                               | NM_012881    |
| <b>1.09</b>  | 2.12 | <b>Increase</b> | 2.19  | 0.04118983 | 0.4254 | similar to ribosomal protein L10                    | PREDICTED: Rattus norvegicus similar to ribosomal protein L10 (LOC689075), mRNA [XM_001069421]                     | XM_001069421 |
| <b>1.26</b>  | 2.39 | <b>Increase</b> | 2.18  | 0.04142679 | 0.4261 | procollagen, type XI, alpha 2 (mapped)              | Rattus norvegicus procollagen, type XI, alpha 2 (mapped) (Col11a2_mapped), mRNA [NM_212528]                        | NM_212528    |
| <b>1.15</b>  | 2.22 | <b>Increase</b> | 2.18  | 0.0415061  | 0.4261 | lysyl oxidase                                       | Rattus norvegicus lysyl oxidase (Lox), mRNA [NM_017061]                                                            | NM_017061    |
| <b>1.01</b>  | 2.02 | <b>Increase</b> | 2.18  | 0.04175704 | 0.4269 | XM_346101                                           | Rattus norvegicus similar to ribosomal protein L30 (LOC367349), mRNA [XM_346101]                                   | XM_346101    |
| <b>-1.06</b> | 2.08 | <b>Decrease</b> | -2.18 | 0.04198626 | 0.4271 | RGD1564173_predicted                                | PREDICTED: Rattus norvegicus similar to RIKEN cDNA 1700001F22 (predicted) (RGD1564173_predicted), mRNA [XM_579040] | XM_579040    |
| <b>-1.27</b> | 2.42 | <b>Decrease</b> | -2.17 | 0.04219395 | 0.4282 | leucine rich repeat protein 2, neuronal (predicted) | PREDICTED: Rattus norvegicus leucine rich repeat protein 2,                                                        | XM_222670    |

|              |      |                 |       |            |        |                                            |                                                                                                                                                                     |              |
|--------------|------|-----------------|-------|------------|--------|--------------------------------------------|---------------------------------------------------------------------------------------------------------------------------------------------------------------------|--------------|
|              |      |                 |       |            |        |                                            | neuronal (predicted) (Lrrn2_predicted), mRNA [XM_222670]                                                                                                            |              |
| <b>1.16</b>  | 2.24 | <b>Increase</b> | 2.17  | 0.04228922 | 0.4286 | similar to RIKEN cDNA 2810002D13 gene      | Rattus norvegicus similar to RIKEN cDNA 2810002D13 gene (RGD1307128), mRNA [NM_001012354]                                                                           | NM_001012354 |
| <b>-1.48</b> | 2.79 | <b>Decrease</b> | -2.17 | 0.04246787 | 0.4293 | AW142013                                   | AW142013 EST292128 Normalized rat ovary, Bento Soares Rattus sp. cDNA clone RGICT53 5' end similar to basic-leucine zipper nuclear factor, mRNA sequence [AW142013] | AW142013     |
| <b>-1.10</b> | 2.15 | <b>Decrease</b> | -2.17 | 0.04278324 | 0.4310 | AI412098                                   | AI412098 EST240392 Normalized rat kidney, Bento Soares Rattus sp. cDNA clone RKIEJ68 3' end, mRNA sequence [AI412098]                                               | AI412098     |
| <b>2.69</b>  | 6.45 | <b>Increase</b> | 2.17  | 0.04289125 | 0.4315 | mast cell protease 1                       | Rattus norvegicus mast cell protease 1 precursor (RMCP-1) mRNA, complete cds. [U67915]                                                                              | U67915       |
| <b>2.48</b>  | 5.57 | <b>Increase</b> | 2.17  | 0.04289192 | 0.4315 | secreted acidic cysteine rich glycoprotein | Rattus norvegicus secreted acidic cysteine rich glycoprotein (Sparc), mRNA [NM_012656]                                                                              | NM_012656    |
| <b>-1.33</b> | 2.51 | <b>Decrease</b> | -2.16 | 0.04316576 | 0.4317 | similar to SH3-domain binding protein 3    | PREDICTED: Rattus norvegicus similar to SH3-domain binding protein 3 (LOC688018), mRNA [XR_009418]                                                                  | XR_009418    |
| <b>1.29</b>  | 2.45 | <b>Increase</b> | 2.16  | 0.04339813 | 0.4329 | TC523917                                   | 1913423B exoK gene. {Sinorhizobium meliloti;}, partial (6%) [TC523917]                                                                                              |              |
| <b>-1.24</b> | 2.36 | <b>Decrease</b> | -2.16 | 0.04384894 | 0.4353 | M33313                                     | RATCYP2A21 Rat hepatic steroid hydroxylase IIA2 (CYP2A2) gene, exons 1 and 2 [M33313]                                                                               | M33313       |
| <b>1.03</b>  | 2.04 | <b>Increase</b> | 2.15  | 0.04393574 | 0.4354 | UDP-glucuronate decarboxylase 1            | Rattus norvegicus UDP-glucuronate decarboxylase 1 (Uxs1), mRNA [NM_139336]                                                                                          | NM_139336    |

|              |      |                 |       |            |        |                                                                        |                                                                                                                              |              |
|--------------|------|-----------------|-------|------------|--------|------------------------------------------------------------------------|------------------------------------------------------------------------------------------------------------------------------|--------------|
| <b>1.13</b>  | 2.18 | <b>Increase</b> | 2.15  | 0.04405789 | 0.4354 | two pore channel 1                                                     | Rattus norvegicus two pore channel 1 (Tpcn1), mRNA [NM_139332]                                                               | NM_139332    |
| <b>-2.06</b> | 4.17 | <b>Decrease</b> | -2.15 | 0.04412762 | 0.4354 | alpha thalassemia/mental retardation syndrome X-linked homolog (human) | PREDICTED: Rattus norvegicus alpha thalassemia/mental retardation syndrome X-linked homolog (human) (Atrx), mRNA [XM_217570] | XM_217570    |
| <b>1.96</b>  | 3.89 | <b>Increase</b> | 2.15  | 0.04437498 | 0.4360 | carboxypeptidase A3                                                    | PREDICTED: Rattus norvegicus carboxypeptidase A3 (Cpa3), mRNA [XM_342219]                                                    | XM_342219    |
| <b>1.24</b>  | 2.35 | <b>Increase</b> | 2.15  | 0.04441238 | 0.4361 | LOC691522                                                              | PREDICTED: Rattus norvegicus hypothetical protein LOC691522 (LOC691522), mRNA [XM_001078640]                                 | XM_001078640 |
| <b>1.37</b>  | 2.59 | <b>Increase</b> | 2.15  | 0.04456073 | 0.4364 | ARP3 actin-related protein 3 homolog (yeast)                           | Rattus norvegicus ARP3 actin-related protein 3 homolog (yeast) (Actr3), mRNA [NM_031068]                                     | NM_031068    |
| <b>-1.16</b> | 2.23 | <b>Decrease</b> | -2.15 | 0.04463685 | 0.4364 | AABR03006190                                                           | Rattus norvegicus chromosome 1, 7 clones, strain BN/SsNHsdMCW RNOR03210214, whole genome shotgun sequence [AABR03006190]     | AABR03006190 |
| <b>1.60</b>  | 3.04 | <b>Increase</b> | 2.15  | 0.04474353 | 0.4368 | AI233749                                                               | AI233749 EST230437 Normalized rat kidney, Bento Soares Rattus sp. cDNA clone RKIDJ59 3' end, mRNA sequence [AI233749]        | AI233749     |
| <b>-1.14</b> | 2.21 | <b>Decrease</b> | -2.15 | 0.04475269 | 0.4368 | CO396335                                                               | AGENCOURT_26737670 NIH_MGC_255 Rattus norvegicus cDNA clone IMAGE:7317613 5', mRNA sequence [CO396335]                       | CO396335     |
| <b>1.14</b>  | 2.20 | <b>Increase</b> | 2.14  | 0.04502713 | 0.4372 | cerebral endothelial cell adhesion molecule 1                          | Rattus norvegicus cerebral endothelial cell adhesion molecule 1 (Ceecam1), mRNA [NM_001011962]                               | NM_001011962 |
| <b>1.20</b>  | 2.30 | <b>Increase</b> | 2.14  | 0.04538006 | 0.4374 | AA925693                                                               | AA925693 UI-R-A1-ec-a-04-0-UI.s1 UI-R-A1 Rattus norvegicus cDNA                                                              | AA925693     |

|              |      |                 |       |            |        |                                                                |                                                                                                                                                                                                   |              |
|--------------|------|-----------------|-------|------------|--------|----------------------------------------------------------------|---------------------------------------------------------------------------------------------------------------------------------------------------------------------------------------------------|--------------|
|              |      |                 |       |            |        |                                                                | clone UI-R-A1-ec-a-04-0-UI 3' similar to gi [AA925693]                                                                                                                                            |              |
| <b>-1.82</b> | 3.54 | <b>Decrease</b> | -2.14 | 0.04565938 | 0.4379 | pyrroline-5-carboxylate reductase-like                         | Rattus norvegicus pyrroline-5-carboxylate reductase-like (Pyclr), mRNA [NM_001011993]                                                                                                             | NM_001011993 |
| <b>1.27</b>  | 2.41 | <b>Increase</b> | 2.13  | 0.04598545 | 0.4390 | AW914967                                                       | AW914967 EST346271 Normalized rat ovary, Bento Soares Rattus sp. cDNA clone RGIBM91 5' end, mRNA sequence [AW914967]                                                                              | AW914967     |
| <b>1.05</b>  | 2.07 | <b>Increase</b> | 2.12  | 0.04660006 | 0.4424 | cadherin EGF LAG seven-pass G-type receptor 1                  | PREDICTED: Rattus norvegicus cadherin EGF LAG seven-pass G-type receptor 1 (Celsr1), mRNA [XM_001070474]                                                                                          | XM_001070474 |
| <b>-1.58</b> | 2.99 | <b>Decrease</b> | -2.12 | 0.04677122 | 0.4429 | leprecan-like 1                                                | Rattus norvegicus leprecan-like 1 (Leprel1), mRNA [NM_001025627]                                                                                                                                  | NM_001025627 |
| <b>1.09</b>  | 2.13 | <b>Increase</b> | 2.12  | 0.04684448 | 0.4431 | similar to RIKEN cDNA 9230117N10                               | Rattus norvegicus similar to RIKEN cDNA 9230117N10 (RGD1311155), mRNA [NM_001014166]                                                                                                              | NM_001014166 |
| <b>1.01</b>  | 2.01 | <b>Increase</b> | 2.12  | 0.04690984 | 0.4432 | death-associated protein                                       | Rattus norvegicus death-associated protein (Dap), mRNA [NM_022526]                                                                                                                                | NM_022526    |
| <b>1.06</b>  | 2.09 | <b>Increase</b> | 2.12  | 0.04704079 | 0.4435 | LOC294446                                                      | PREDICTED: Rattus norvegicus similar to Myristoylated alanine-rich C-kinase substrate (MARCKS) (Protein kinase C substrate 80 kDa protein), transcript variant 2 (LOC294446), mRNA [XM_001061084] | XM_001061084 |
| <b>-1.16</b> | 2.23 | <b>Decrease</b> | -2.12 | 0.04733898 | 0.4435 | transmembrane BAX inhibitor motif containing 1                 | Rattus norvegicus transmembrane BAX inhibitor motif containing 1 (Tmbim1), mRNA [NM_001007713]                                                                                                    | NM_001007713 |
| <b>1.10</b>  | 2.14 | <b>Increase</b> | 2.12  | 0.0475309  | 0.4436 | doublesex and mab-3 related transcription factor 2 (predicted) | PREDICTED: Rattus norvegicus doublesex and mab-3 related transcription factor 2 (predicted)                                                                                                       | XM_219927    |

|              |      |                 |       |            |        |                                                     |                                                                                                                                     |              |
|--------------|------|-----------------|-------|------------|--------|-----------------------------------------------------|-------------------------------------------------------------------------------------------------------------------------------------|--------------|
|              |      |                 |       |            |        |                                                     | (Dmrt2_predicted), mRNA [XM_219927]                                                                                                 |              |
| <b>1.07</b>  | 2.10 | <b>Increase</b> | 2.11  | 0.04763449 | 0.4442 | olfactory receptor 1423 (predicted)                 | Rattus norvegicus olfactory receptor 1423 (predicted) (Olr1423_predicted), mRNA [NM_001000006]                                      | NM_001000006 |
| <b>-1.42</b> | 2.67 | <b>Decrease</b> | -2.11 | 0.04788666 | 0.4451 | filamin A interacting protein 1                     | Rattus norvegicus filamin A interacting protein 1 (Filip1), mRNA [NM_145682]                                                        | NM_145682    |
| <b>-1.01</b> | 2.01 | <b>Decrease</b> | -2.11 | 0.04803214 | 0.4454 | Trp53bp1_predicted                                  | PREDICTED: Rattus norvegicus transformation related protein 53 binding protein 1 (predicted) (Trp53bp1_predicted), mRNA [XM_215812] | XM_215812    |
| <b>1.59</b>  | 3.01 | <b>Increase</b> | 2.11  | 0.04811401 | 0.4457 | AI045333                                            | AI045333 UI-R-C1-kh-e-06-0-UI.s1 UI-R-C1 Rattus norvegicus cDNA clone UI-R-C1-kh-e-06-0-UI 3', mRNA sequence [AI045333]             | AI045333     |
| <b>1.09</b>  | 2.13 | <b>Increase</b> | 2.11  | 0.04834112 | 0.4461 | colony stimulating factor 1 (macrophage)            | Rattus norvegicus colony stimulating factor 1 (macrophage) (Csf1), mRNA [NM_023981]                                                 | NM_023981    |
| <b>-1.84</b> | 3.58 | <b>Decrease</b> | -2.11 | 0.04834792 | 0.4461 | AW914294                                            | AW914294 EST345598 Normalized rat brain, Bento Soares Rattus sp. cDNA clone RGIAD11 5' end, mRNA sequence [AW914294]                | AW914294     |
| <b>1.28</b>  | 2.43 | <b>Increase</b> | 2.11  | 0.04839854 | 0.4461 | similar to calmodulin-like 4                        | Rattus norvegicus similar to CLN6 protein (LOC315746), mRNA [XM_236325]                                                             | XM_236325    |
| <b>1.50</b>  | 2.82 | <b>Increase</b> | 2.11  | 0.0484262  | 0.4463 | aryl hydrocarbon receptor nuclear translocator-like | Rattus norvegicus aryl hydrocarbon receptor nuclear translocator-like (Arntl), mRNA [NM_024362]                                     | NM_024362    |
| <b>1.02</b>  | 2.03 | <b>Increase</b> | 2.10  | 0.04871161 | 0.4469 | ribonuclease, RNase A family 4                      | Rattus norvegicus ribonuclease, RNase A family 4 (Rnase4), mRNA [NM_020082]                                                         | NM_020082    |

|              |      |                 |       |            |        |                                                                        |                                                                                                                                        |           |
|--------------|------|-----------------|-------|------------|--------|------------------------------------------------------------------------|----------------------------------------------------------------------------------------------------------------------------------------|-----------|
| <b>1.18</b>  | 2.27 | <b>Increase</b> | 2.10  | 0.04917496 | 0.4481 | XM_345721                                                              | Rattus norvegicus similar to KIAA1912 protein (LOC366726), mRNA [XM_345721]                                                            | XM_345721 |
| <b>-1.16</b> | 2.23 | <b>Decrease</b> | -2.10 | 0.0493999  | 0.4485 | AA874941                                                               | AA874941 UI-R-E0-ci-d-06-0-UI.s1 UI-R-E0 Rattus norvegicus cDNA clone UI-R-E0-ci-d-06-0-UI 3' similar to gi [AA874941]                 | AA874941  |
| <b>1.20</b>  | 2.29 | <b>Increase</b> | 2.09  | 0.04969242 | 0.4488 | reversion-inducing-cysteine-rich protein with kazal motifs (predicted) | PREDICTED: Rattus norvegicus reversion-inducing-cysteine-rich protein with kazal motifs (predicted) (Reck_predicted), mRNA [XM_233371] | XM_233371 |

**Supplementary Material Table S4.** *STRING* (a database of known and predicted protein-protein interactions) analysis of differentially expressed genes from HF/SD and HF/RD animals at adolescence. 499 nodes were identified, with an average local clustering coefficient of 0.299 and a PPI enrichment p-value  $<1 \cdot 10^{-16}$ . Of these, eight main clusters were identified with the highest confidence for interaction score ( $\geq 0.9$ ).

|           |                                                                                                                                      |
|-----------|--------------------------------------------------------------------------------------------------------------------------------------|
| Cluster 1 | Mrps15, Rps25, Rpsa, Fau, Rps4x, Mrps2, Mrps5, Mrps10, Rps5, Rps15a, Rps15, Rps16, <i>RGD1566136</i> , Mrps9, Mrpl43, Rps11, Mrps15. |
| Cluster 2 | Actr2, Arpc4, Epn2, Baiap2, Nckap11, Actr3, Synj1, Ston2                                                                             |
| Cluster 3 | Pf4, Sparc, Procr, Grm2, Fpr1, C5ar1, Gpsm1, Ccl21, Gabbr1                                                                           |
| Cluster 4 | Slu7, Poldip3, Ranbp2, Dhx9, Srrm1, Bud31, Elavl1, Ddx46, Sf3b1                                                                      |
| Cluster 5 | Agtr1a, Cck, P2ry6, Tacr2, P2ry1                                                                                                     |
| Cluster 6 | RT1-Da, RT1-Bb, Ap1s1, RT1-Ba                                                                                                        |
| Cluster 7 | Cyba, Ncf1, Ncf4, Mmp2                                                                                                               |
| Cluster 8 | Coll1a1, Col6a2, Coll1a2                                                                                                             |



**Supplementary Material Table S5.** Top 10 KEGG pathways identified by STRING from the analysis of differentially expressed genes from HF/SD and HF/RD animals at adolescence.

| <b>Pathway Description</b>                   | <b>False discovery rate (FDR)</b> | <b>Matching proteins</b>                                                                             |
|----------------------------------------------|-----------------------------------|------------------------------------------------------------------------------------------------------|
| ECM-receptor interaction                     | 8.95E-07                          | Cd44,Chad,Col11a2,Col1a1,Col1a2,Col5a1,Col6a2,Comp,Gp9,Itga7,Lamb2,Lamb3,Spp1,Thbs2                  |
| Staphylococcus aureus infection              | 7.26E-05                          | C1qa,C1qc,C1s,C2,C5ar1,Fpr1,RT1-Ba,RT1-Bb,RT1-Da                                                     |
| Focal adhesion                               | 0.00375                           | Akt1,Chad,Col11a2,Col1a1,Col1a2,Col5a1,Col6a2,Comp,Itga7,Lamb2,Lamb3,Mylpf,Sos2,Spp1,Thbs2           |
| Renin-angiotensin system                     | 0.00386                           | Agtr1a,Anpep,Cma1,Cpa3,Mcpt8l3                                                                       |
| Phagosome                                    | 0.00408                           | Atp6v1g2,Comp,Ctss,Cyba,Mrc1,Ncf1,Ncf4,RT1-A2,RT1-Ba,RT1-Bb,RT1-Da,Tfrc,Thbs2                        |
| Intestinal immune network for IgA production | 0.011                             | Cd80,Cxcr4,RT1-Ba,RT1-Bb,RT1-Da,Tnfsf13                                                              |
| Systemic lupus erythematosus                 | 0.0159                            | C1qa,C1qc,C1s,Cd80,Mcpt8l3,RT1-Ba,RT1-Bb,RT1-Da                                                      |
| PI3K-Akt signaling pathway                   | 0.0289                            | Akt1,Chad,Col11a2,Col1a1,Col1a2,Col5a1,Col6a2,Comp,Csf1,Itga7,Lamb2,Lamb3,Osmr,Sos2,Spp1,Thbs2,Ywhab |
| Leukocyte transendothelial migration         | 0.0314                            | Cldn11,Cldn23,Cxcr4,Cyba,Jam2,Mmp2,Mylpf,Ncf1,Ncf4                                                   |
| Osteoclast differentiation                   | 0.0402                            | Akt1,Csf1r,Ctsk,Cyba,Fosb,Jund,Ncf1,Ncf4,Tnfrsf11b                                                   |
